# Supplementary material for: Theoretical study on the mechanism, chemo- and enantioselectivity of the Ag- vs. Rh-catalyzed intramolecular carbene transfer reaction of diazoacetamides
Source: Royal Society of Chemistry journal article supplement (doi:10.1039/d2ra01298g), 2022-01-01
Supplement: d2ra01298g1.pdf [file d2ra01298g1.pdf]

## Supporting Information

### Theoretical study on the mechanism, chemo- and enantioselectivity of the Ag- vs. Rh-catalyzed intramolecular carbene transfer reaction of diazoacetamides

Qingmin Song<sup>1</sup>, Jiayi Wu<sup>1</sup>, Nikolaos V. Tzouras<sup>2</sup>, Yong Wu\*<sup>1</sup> and Steven P. Nolan\*<sup>2</sup>

<sup>1</sup> Department of Chemistry Northeast Normal University, Changchun 130024, China.

<sup>2</sup> Department of Chemistry and Center for Sustainable Chemistry, Ghent University, Krijgslaan 281, S3, Ghent 9000, Belgium.

\* Corresponding author. E-mail: [wuy651@nenu.edu.cn](mailto:wuy651@nenu.edu.cn); [Steven.Nolan@UGent.be](mailto:Steven.Nolan@UGent.be)

### Table of Contents

|                                                                                                        |    |
|--------------------------------------------------------------------------------------------------------|----|
| <b><u>I. Intramolecular 1° / 3° C-H insertion reaction of Ag-carbene</u></b> .....                     | S2 |
| <b><u>II. Intramolecular 1° / 3° C-H insertion reaction of Rh-carbene</u></b> .....                    | S2 |
| <b><u>III. The Büchner reaction mechanism catalyzed by Rh<sub>2</sub>(OAc)<sub>4</sub></u></b> .....   | S3 |
| <b><u>IV. Electrophilic addition of R configuration catalyzed by chiral silver phosphate</u></b> ..... | S3 |
| <b><u>V. Electrophilic addition of S configuration catalyzed by chiral silver phosphate</u></b> .....  | S4 |
| <b><u>VI. Orbital interaction diagram of transition metal carbene</u></b> .....                        | S5 |
| <b><u>VII. The orbital weight Fukui function diagram of donor metal carbene</u></b> .....              | S6 |
| <b><u>VIII. Cartesian Coordinates of the Computed Structures</u></b> .....                             | S6 |

## I. Intramolecular 1° / 3° C-H insertion reaction of Ag-carbene

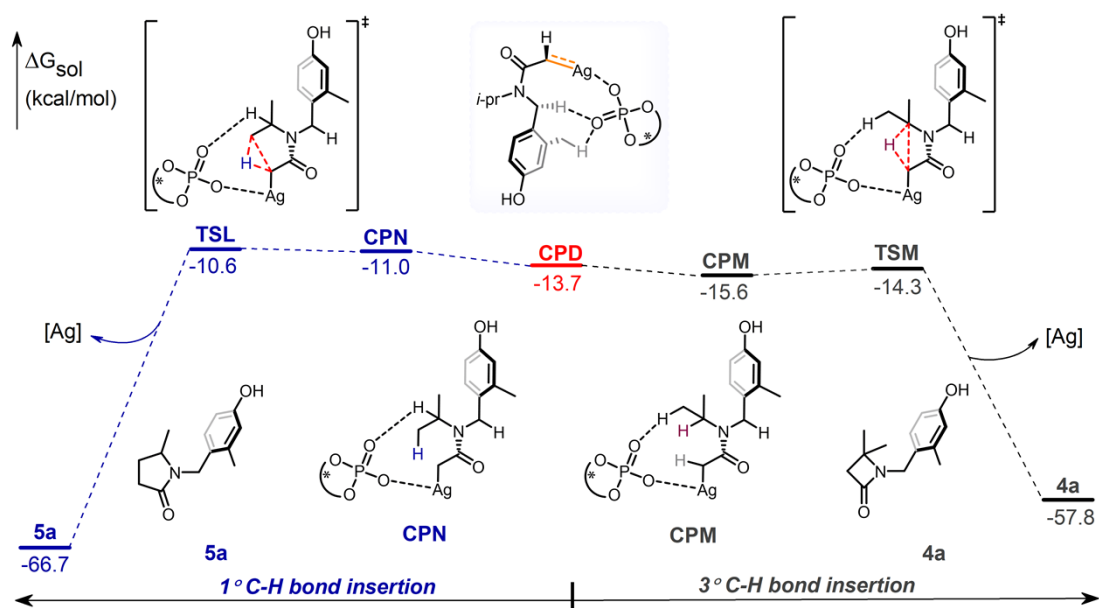

**Figure S1.** Gibbs free energy profile (in kcal/mol) for the pathways of intramolecular 1° / 3° C-H insertion reaction of Ag-carbene.

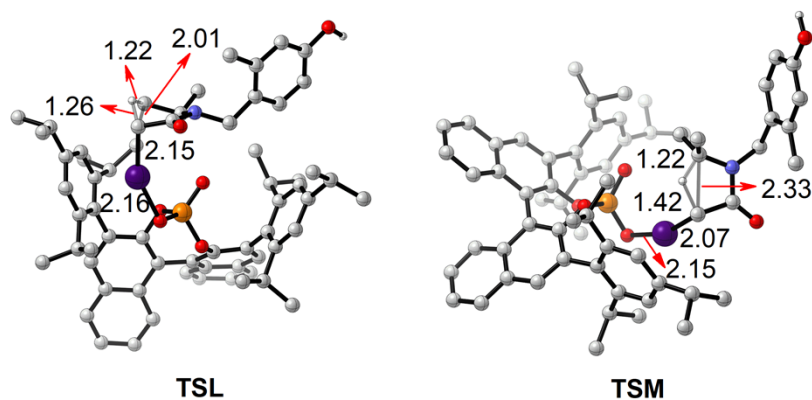

**Figure S2.** TSL and TSM transition state structures involved in silver catalyzed C-H insertion reaction.

## II. Intramolecular 1° / 3° C-H insertion reaction of Rh-carbene

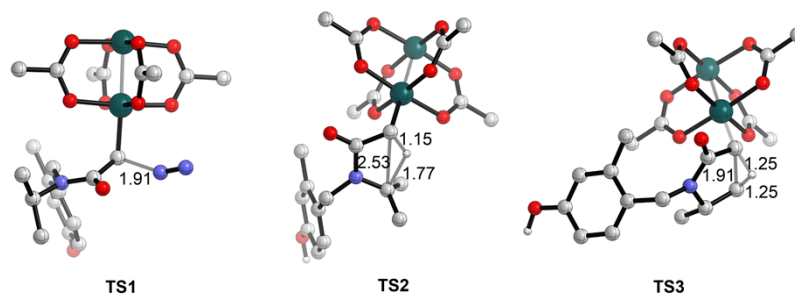

**Figure S3.** TS1, TS2 and TS3 transition state structures involved in rhodium catalyzed C-H

insertion reaction.

### III. The Büchner reaction mechanism catalyzed by $\text{Rh}_2(\text{OAc})_4$

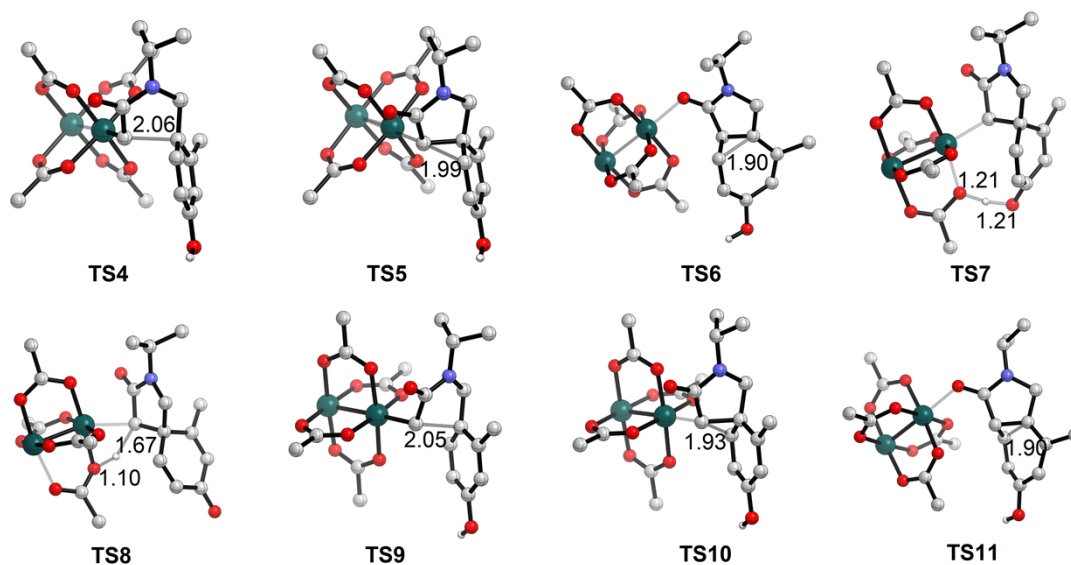

**Figure S4.** Key transition state structures involved in the Büchner reaction mechanism catalyzed by  $\text{Rh}_2(\text{OAc})_4$ .

### IV. Electrophilic addition of R configuration catalyzed by chiral silver phosphate

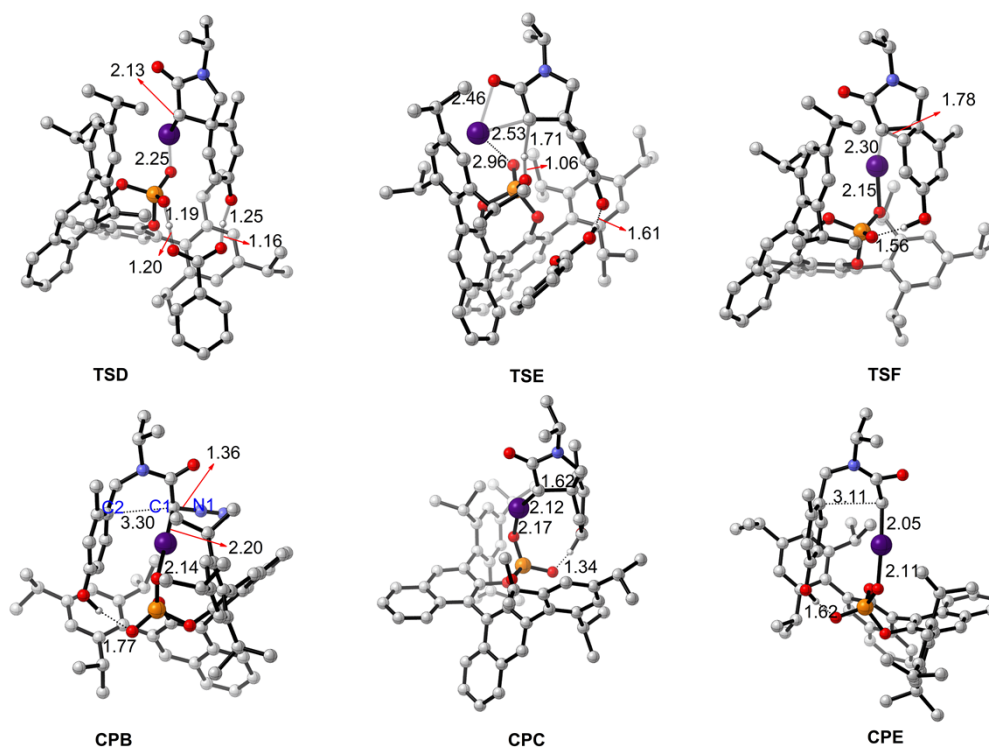

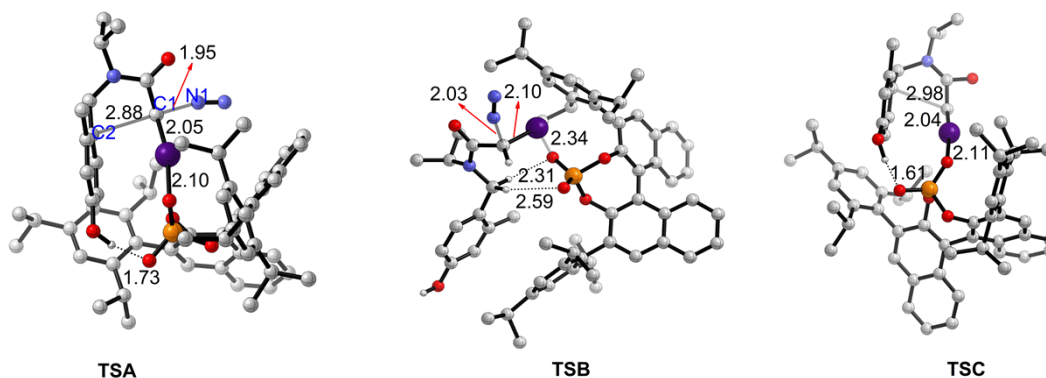

**Figure S5.** The 3D structures of key transition states and intermediates involved in the Ag-catalyzed asymmetric R-configuration de-aromatization reaction.

## V. Proto-demetalation process without Benzoic acid and Büchner reaction of R configuration

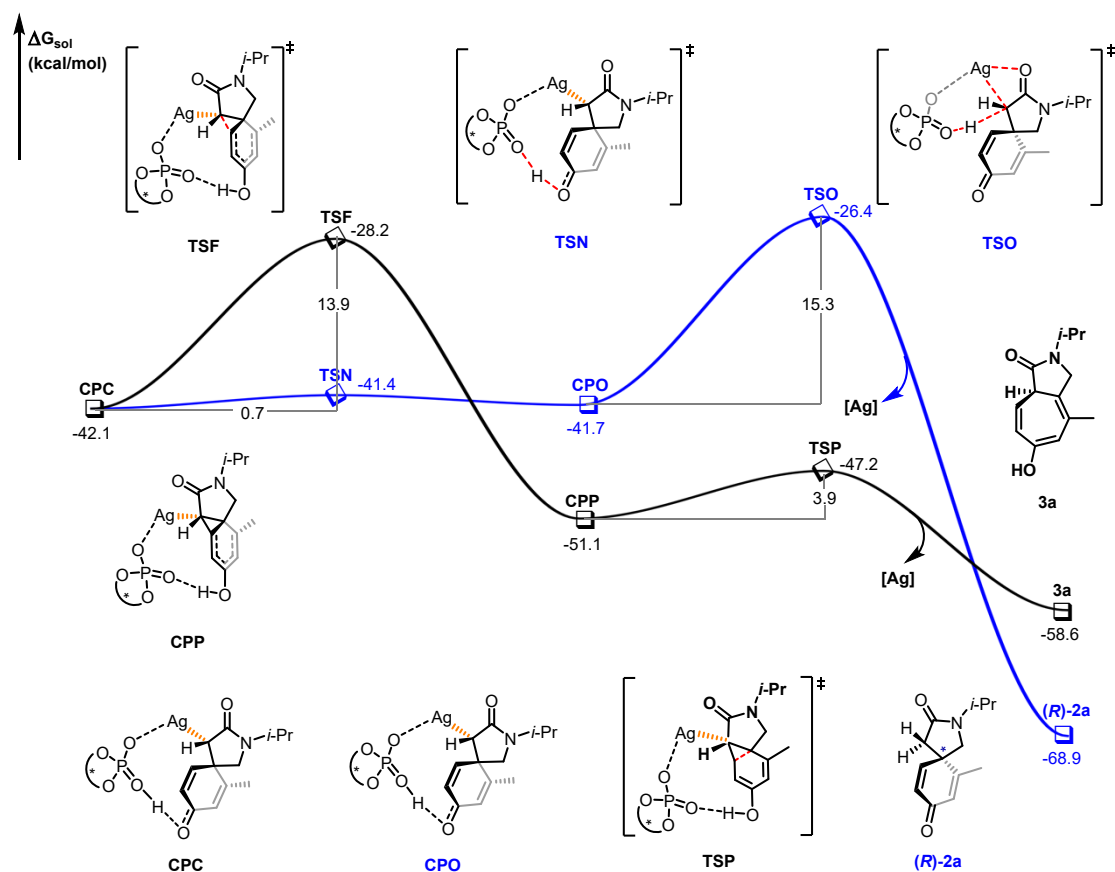

**Figure S6.** Gibbs free energy profile (in kcal/mol) for the proto-demetalation process without the assistance of benzoic acid and Büchner reaction mechanism of R configuration catalyzed by chiral silver phosphate.

## VI. Electrophilic addition of S configuration catalyzed by chiral silver phosphate

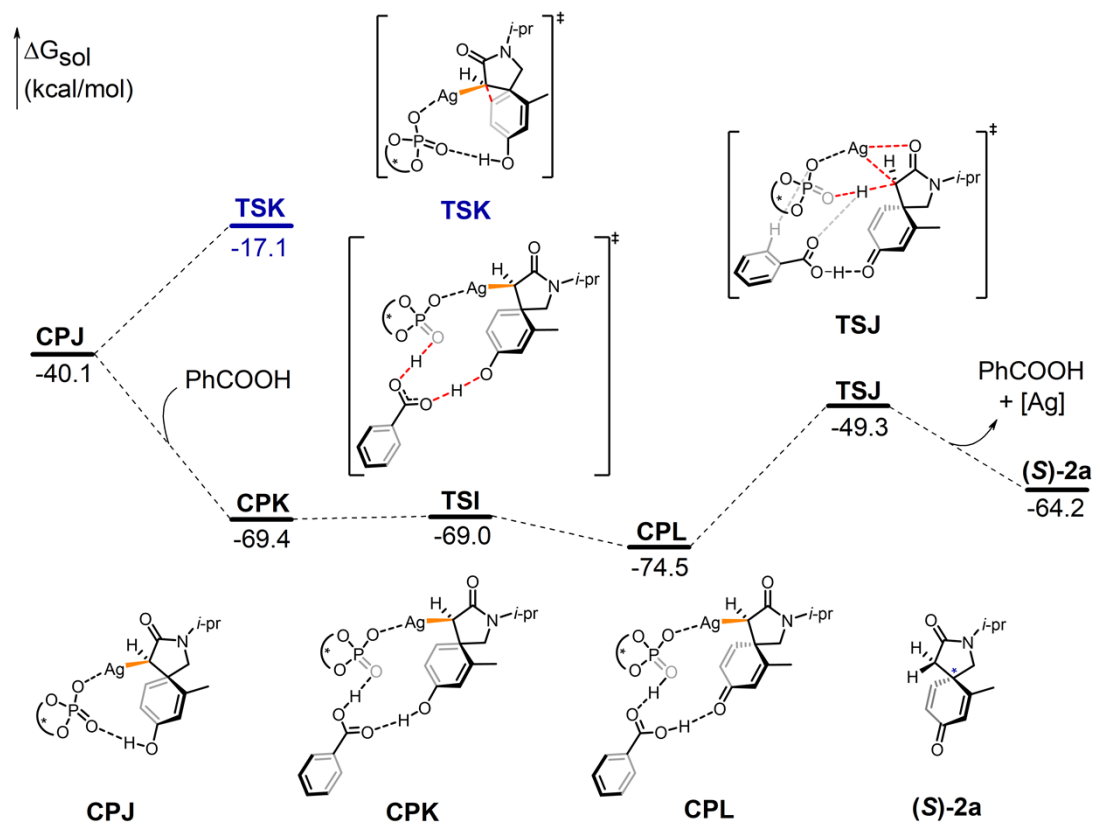

**Fig. S7.** Gibbs free energy profile (in kcal/mol) for the proto-demetalation process and Büchner reaction mechanism of S configuration catalyzed by chiral silver phosphate

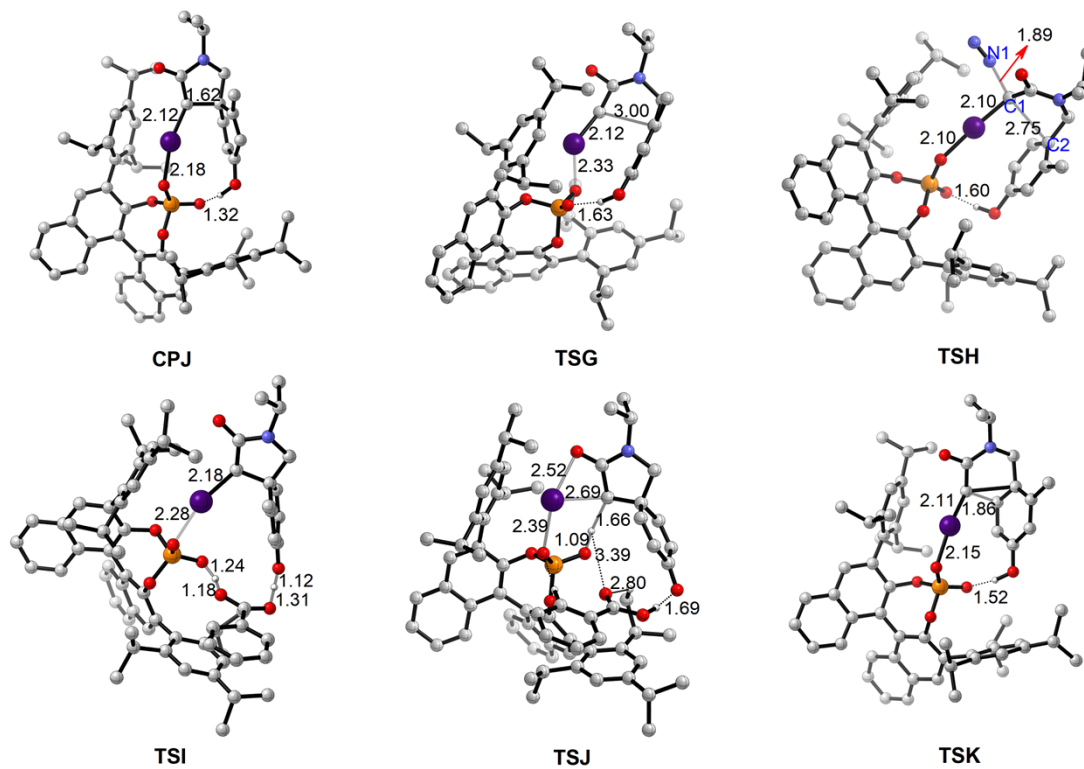

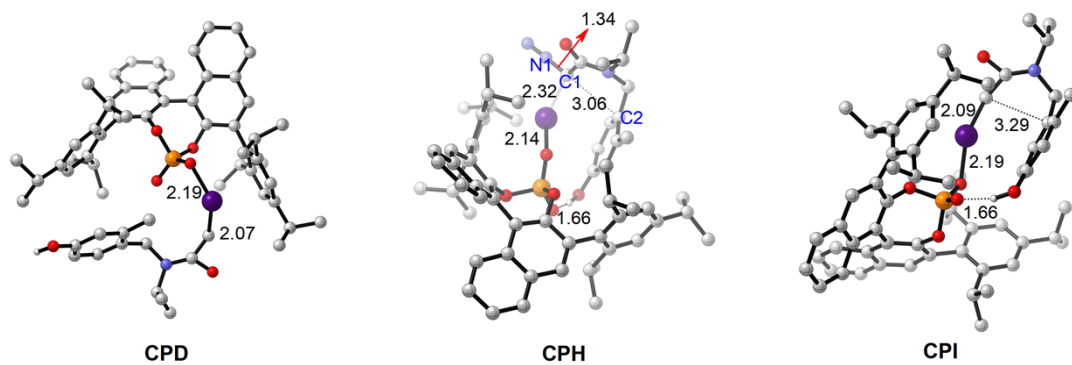

**Figure S8.** The 3D structures of key transition states and intermediates involved in the Ag-catalyzed asymmetric S-configuration de-aromatization reaction.

### VII. Orbital interaction diagram of transition metal carbene

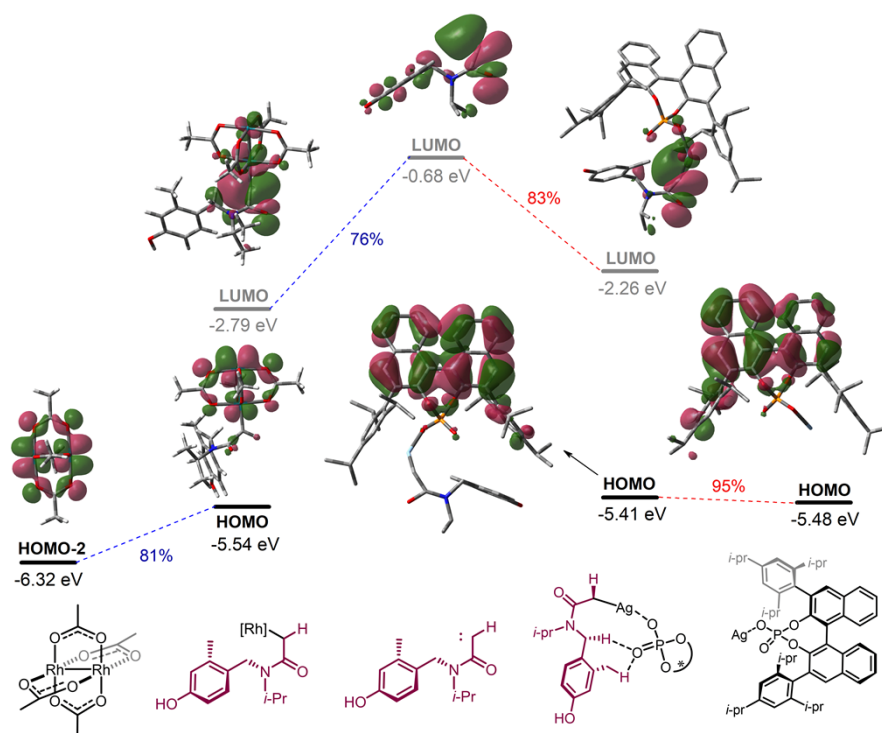

**Fig. S9.** Orbital interaction diagram of Ag-carbene and Rh-carbene

### VIII. The orbital weight Fukui function diagram of donor metal carbenoid

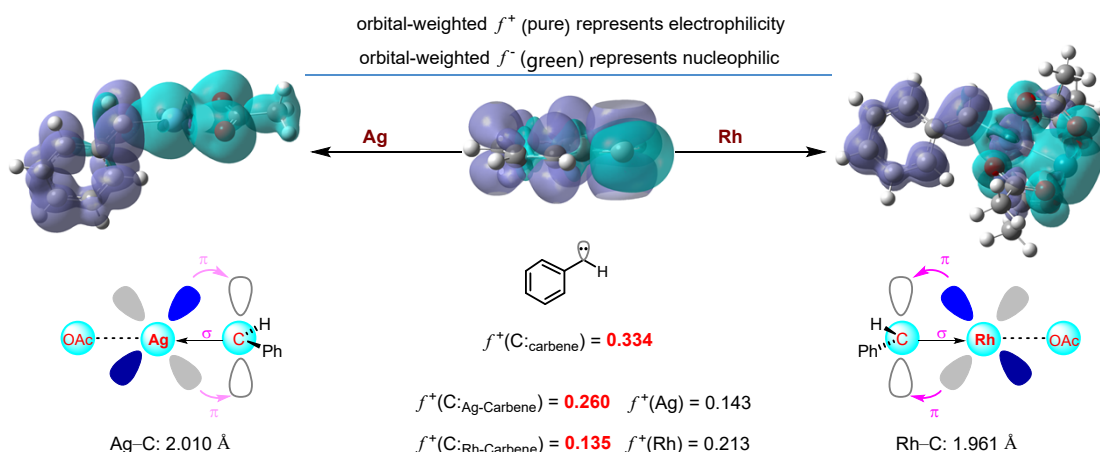

**Fig. S10.** The orbital weight Fukui function diagram of donor Ag-carbene and donor Rh-carbene.

## IX. Cartesian Coordinates of the Computed Structures

### Rh<sub>2</sub>(OAc)<sub>4</sub>

|                                              |                             |
|----------------------------------------------|-----------------------------|
| Zero-point correction=                       | 0.210282 (Hartree/Particle) |
| Thermal correction to Energy=                | 0.231500                    |
| Thermal correction to Enthalpy=              | 0.232444                    |
| Thermal correction to Gibbs Free Energy=     | 0.159203                    |
| Sum of electronic and zero-point Energies=   | -1135.037849                |
| Sum of electronic and thermal Energies=      | -1135.016631                |
| Sum of electronic and thermal Enthalpies=    | -1135.015687                |
| Sum of electronic and thermal Free Energies= | -1135.088928                |

|    |             |             |             |
|----|-------------|-------------|-------------|
| Rh | -0.00447900 | -0.00466700 | 1.19365300  |
| Rh | -0.00439100 | -0.00452600 | -1.19349000 |
| O  | 1.44405800  | 1.44879900  | 1.13435100  |
| O  | -1.45765200 | 1.44346700  | 1.13397700  |
| O  | 1.44850200  | -1.45296600 | 1.13403100  |
| O  | -1.45242800 | -1.45728900 | 1.13375900  |
| O  | -1.45163700 | -1.45785400 | -1.13401300 |
| O  | -1.45827200 | 1.44290700  | -1.13376600 |
| O  | 1.44928500  | -1.45218500 | -1.13370600 |
| O  | 1.44341100  | 1.44974300  | -1.13335300 |
| C  | 1.86406600  | -1.85874700 | 0.00017900  |
| C  | -1.86344200 | 1.85904400  | 0.00011800  |
| C  | -1.86747500 | -1.86348400 | -0.00016700 |
| C  | 1.85892100  | 1.85542900  | 0.00059200  |
| C  | 2.96083900  | 2.88412300  | -0.00039800 |
| H  | 3.92423100  | 2.36490800  | -0.04252900 |
| H  | 2.87912000  | 3.52309000  | -0.88076200 |

|   |             |             |             |
|---|-------------|-------------|-------------|
| H | 2.92741500  | 3.47583400  | 0.91504900  |
| C | 2.96563800  | -2.88774000 | -0.00022600 |
| H | 2.89811300  | -3.51247500 | -0.89179700 |
| H | 3.92970000  | -2.36831200 | -0.01669700 |
| H | 2.91699700  | -3.49406400 | 0.90501800  |
| C | -2.97020400 | -2.89108900 | -0.00042900 |
| H | -2.91608400 | -3.50368200 | 0.90032900  |
| H | -3.93353700 | -2.37007400 | -0.00590800 |
| H | -2.90970900 | -3.50971900 | -0.89669200 |
| C | -2.89103000 | 2.96187000  | -0.00004600 |
| H | -3.50259300 | 2.90892100  | 0.90148800  |
| H | -2.36985100 | 3.92509500  | -0.00718500 |
| H | -3.51064000 | 2.90072800  | -0.89561400 |

### CPI

|                                              |                             |
|----------------------------------------------|-----------------------------|
| Zero-point correction=                       | 0.501163 (Hartree/Particle) |
| Thermal correction to Energy=                | 0.540973                    |
| Thermal correction to Enthalpy=              | 0.541917                    |
| Thermal correction to Gibbs Free Energy=     | 0.429872                    |
| Sum of electronic and zero-point Energies=   | -1955.035867                |
| Sum of electronic and thermal Energies=      | -1954.996057                |
| Sum of electronic and thermal Enthalpies=    | -1954.995113                |
| Sum of electronic and thermal Free Energies= | -1955.107158                |

|    |             |             |             |
|----|-------------|-------------|-------------|
| Rh | 0.90343500  | -0.00409100 | 0.34096700  |
| Rh | 2.96053600  | -0.72118800 | -0.71758800 |
| O  | 0.47123900  | 1.01346000  | -1.40788300 |
| O  | 0.00454000  | -1.71219800 | -0.41789100 |
| O  | 1.92082300  | 1.62610700  | 1.05071700  |
| O  | 1.47751300  | -1.06871900 | 2.00742700  |
| O  | 3.43596100  | -1.68125100 | 1.04157900  |
| O  | 1.95703800  | -2.41043900 | -1.34209700 |
| O  | 3.82851400  | 1.00531300  | -0.01053000 |
| O  | 2.37107600  | 0.28235900  | -2.41188000 |
| C  | 3.14378200  | 1.78400200  | 0.72347600  |
| C  | 0.72777800  | -2.54593500 | -1.06304000 |
| C  | 2.60845700  | -1.66364300 | 2.00167600  |
| C  | 1.28428200  | 0.93597100  | -2.38837900 |
| C  | -3.99114800 | -1.50669400 | -0.95966600 |
| C  | -5.01434500 | -2.29845900 | -0.44292000 |
| C  | -5.76710200 | -1.87414600 | 0.65747800  |
| C  | -5.49246400 | -0.64158900 | 1.24921700  |
| C  | -4.46797400 | 0.15333600  | 0.73291100  |



|   |             |             |             |
|---|-------------|-------------|-------------|
| C | -3.71097300 | -0.25725700 | -0.36344800 |
| H | -5.24475800 | -3.26173700 | -0.88687600 |
| H | -6.07042700 | -0.30136800 | 2.10542800  |
| H | -4.25446100 | 1.11061900  | 1.19538900  |
| C | -3.19044800 | -1.98091100 | -2.14652500 |
| H | -3.48263700 | -2.99159800 | -2.44099200 |
| H | -3.33404500 | -1.32555900 | -3.01495100 |
| H | -2.12052600 | -1.98302500 | -1.91825200 |
| C | -2.57883800 | 0.58505000  | -0.92305200 |
| H | -2.76777200 | 0.81702500  | -1.97636600 |
| H | -1.65087900 | 0.01077700  | -0.92954600 |
| N | -2.35752500 | 1.85584600  | -0.23921400 |
| C | -1.55001300 | 1.95213000  | 0.85140400  |
| O | -1.24046300 | 3.00720200  | 1.40129600  |
| C | -1.03541300 | 0.63416800  | 1.39573100  |
| H | -1.64101700 | -0.26717800 | 1.32738300  |
| N | -0.57290500 | 0.79971500  | 2.65578400  |
| N | -0.10068600 | 0.96249400  | 3.66001500  |
| C | -2.88660900 | 3.09209500  | -0.86694100 |
| C | -1.75469500 | 3.92247400  | -1.48153900 |
| C | -3.76850000 | 3.90684000  | 0.08431100  |
| H | -3.52790900 | 2.72854700  | -1.67592100 |
| H | -1.15725600 | 3.30793200  | -2.15918300 |
| H | -2.16939800 | 4.76656200  | -2.04199700 |
| H | -1.10050500 | 4.30458400  | -0.69630200 |
| H | -4.59284700 | 3.29773800  | 0.46675600  |
| H | -3.18530700 | 4.28504400  | 0.92398000  |
| H | -4.19926900 | 4.75482800  | -0.45757500 |
| O | -6.75141100 | -2.71048300 | 1.10280700  |
| H | -7.19225800 | -2.30150700 | 1.85858300  |
| C | 0.91649800  | 1.71637000  | -3.62773700 |
| H | -0.14010400 | 1.56850300  | -3.86263500 |
| H | 1.06737800  | 2.78275300  | -3.43221400 |
| H | 1.54039600  | 1.41377100  | -4.46853000 |
| C | 3.83899300  | 2.99646700  | 1.29099000  |
| H | 3.13180900  | 3.82076000  | 1.39468000  |
| H | 4.22094600  | 2.74736700  | 2.28677600  |
| H | 4.68056900  | 3.28042900  | 0.65824600  |
| C | 2.96840000  | -2.42816500 | 3.25190100  |
| H | 2.74300100  | -1.82489700 | 4.13412300  |
| H | 2.35601700  | -3.33417600 | 3.30293600  |
| H | 4.02173400  | -2.70743000 | 3.23710700  |
| C | 0.04745500  | -3.79873400 | -1.56240300 |
| H | -0.82773200 | -4.02916400 | -0.95408500 |

|   |             |             |             |
|---|-------------|-------------|-------------|
| H | -0.27796200 | -3.63848100 | -2.59572500 |
| H | 0.75294600  | -4.63099500 | -1.55741600 |

## TS1

|                                              |  |  |                             |
|----------------------------------------------|--|--|-----------------------------|
| Zero-point correction=                       |  |  | 0.498329 (Hartree/Particle) |
| Thermal correction to Energy=                |  |  | 0.538355                    |
| Thermal correction to Enthalpy=              |  |  | 0.539299                    |
| Thermal correction to Gibbs Free Energy=     |  |  | 0.425765                    |
| Sum of electronic and zero-point Energies=   |  |  | -1955.008857                |
| Sum of electronic and thermal Energies=      |  |  | -1954.968832                |
| Sum of electronic and thermal Enthalpies=    |  |  | -1954.967888                |
| Sum of electronic and thermal Free Energies= |  |  | -1955.081421                |

|    |             |             |             |
|----|-------------|-------------|-------------|
| Rh | 0.90709000  | 0.02507100  | 0.34268300  |
| Rh | 2.93625700  | -0.83275100 | -0.73113900 |
| O  | 0.47825600  | 0.94800200  | -1.45972800 |
| O  | -0.04259000 | -1.70610600 | -0.29705200 |
| O  | 2.00846900  | 1.65432600  | 0.92260000  |
| O  | 1.49813000  | -0.95554900 | 2.05116800  |
| O  | 3.40443200  | -1.71049600 | 1.07577500  |
| O  | 1.85817200  | -2.51827100 | -1.23871000 |
| O  | 3.87216700  | 0.90451100  | -0.13634100 |
| O  | 2.33373300  | 0.10673700  | -2.46377500 |
| C  | 3.22758500  | 1.75309900  | 0.54789000  |
| C  | 0.63874200  | -2.59818600 | -0.91439700 |
| C  | 2.61026100  | -1.59078600 | 2.05280500  |
| C  | 1.27037600  | 0.79139700  | -2.45208900 |
| C  | -4.10607300 | -1.50721700 | -0.87915600 |
| C  | -5.15041600 | -2.24614800 | -0.32781900 |
| C  | -5.85036400 | -1.77937800 | 0.79014600  |
| C  | -5.49894300 | -0.55902800 | 1.36623700  |
| C  | -4.45296500 | 0.18299700  | 0.81528200  |
| C  | -3.75256900 | -0.26803600 | -0.30202800 |
| H  | -5.43794500 | -3.20089100 | -0.75663000 |
| H  | -6.03362300 | -0.18768600 | 2.23747400  |
| H  | -4.17871000 | 1.13039500  | 1.26579400  |
| C  | -3.35663000 | -2.03151500 | -2.07883100 |
| H  | -3.69706300 | -3.03369800 | -2.34932800 |
| H  | -3.49528200 | -1.38468300 | -2.95440300 |
| H  | -2.28134500 | -2.07594100 | -1.88003700 |
| C  | -2.59089300 | 0.50996800  | -0.88969300 |
| H  | -2.73921000 | 0.66684100  | -1.96381400 |
| H  | -1.67605600 | -0.08586600 | -0.83037800 |

|   |             |             |             |
|---|-------------|-------------|-------------|
| N | -2.36018300 | 1.82010900  | -0.28691700 |
| C | -1.47125800 | 1.97280000  | 0.73235000  |
| O | -1.17799700 | 3.05216100  | 1.24698300  |
| C | -0.81542700 | 0.68236400  | 1.17130600  |
| H | -1.49510900 | -0.08109500 | 1.56322500  |
| N | -0.26072400 | 1.26500000  | 2.90429300  |
| N | 0.50866300  | 1.49124600  | 3.66718800  |
| C | -2.96237800 | 3.00599300  | -0.94184700 |
| C | -1.89008400 | 3.82171800  | -1.67257100 |
| C | -3.79806800 | 3.85544800  | 0.02041400  |
| H | -3.64532100 | 2.58232700  | -1.68551500 |
| H | -1.32919700 | 3.18448200  | -2.36124000 |
| H | -2.35573400 | 4.63228300  | -2.24209500 |
| H | -1.19050700 | 4.25134400  | -0.95335000 |
| H | -4.58284100 | 3.25394700  | 0.48778800  |
| H | -3.16944900 | 4.28737800  | 0.79902300  |
| H | -4.28053600 | 4.66497400  | -0.53658300 |
| O | -6.86139500 | -2.56427600 | 1.26810700  |
| H | -7.25728700 | -2.13266900 | 2.03607300  |
| C | 0.88428800  | 1.51383500  | -3.72124500 |
| H | -0.15824100 | 1.29764300  | -3.96846400 |
| H | 0.96777500  | 2.59251800  | -3.55738500 |
| H | 1.53697500  | 1.21754900  | -4.54197900 |
| C | 3.93945800  | 3.01794300  | 0.96085500  |
| H | 3.50667200  | 3.86298200  | 0.41666100  |
| H | 3.78069900  | 3.19940300  | 2.02649200  |
| H | 5.00399500  | 2.94562000  | 0.73931400  |
| C | 2.99916500  | -2.23332500 | 3.36217900  |
| H | 3.85071000  | -2.89837800 | 3.22034500  |
| H | 3.26588300  | -1.44903100 | 4.07769600  |
| H | 2.14893500  | -2.78181500 | 3.77419900  |
| C | -0.10050300 | -3.85419100 | -1.31304000 |
| H | -0.98170000 | -3.99854000 | -0.68734600 |
| H | -0.42088700 | -3.76174500 | -2.35613900 |
| H | 0.56865600  | -4.71336800 | -1.24352500 |

## CP2

|                                            |                             |
|--------------------------------------------|-----------------------------|
| Zero-point correction=                     | 0.490023 (Hartree/Particle) |
| Thermal correction to Energy=              | 0.528143                    |
| Thermal correction to Enthalpy=            | 0.529088                    |
| Thermal correction to Gibbs Free Energy=   | 0.420872                    |
| Sum of electronic and zero-point Energies= | -1845.517646                |
| Sum of electronic and thermal Energies=    | -1845.479526                |

|                                              |              |
|----------------------------------------------|--------------|
| Sum of electronic and thermal Enthalpies=    | -1845.478582 |
| Sum of electronic and thermal Free Energies= | -1845.586797 |

|    |             |             |             |
|----|-------------|-------------|-------------|
| Rh | -1.08071500 | 0.56940100  | -0.38336600 |
| Rh | -2.41242900 | -1.28072600 | 0.54486400  |
| O  | -0.10196700 | 0.65311600  | 1.43160100  |
| O  | 0.20660800  | -0.90324600 | -1.05993900 |
| O  | -2.52764600 | 1.82639400  | 0.36229400  |
| O  | -2.15998000 | 0.38281500  | -2.12441100 |
| O  | -3.34548500 | -1.37277400 | -1.29670400 |
| O  | -0.96304300 | -2.59329100 | -0.10465900 |
| O  | -3.78981800 | 0.11669800  | 1.16205800  |
| O  | -1.36429200 | -1.02052300 | 2.30936500  |
| C  | -3.55763100 | 1.34186000  | 0.94497600  |
| C  | 0.01541800  | -2.13358400 | -0.75832900 |
| C  | -3.04553500 | -0.54021800 | -2.20061600 |
| C  | -0.46399900 | -0.13622000 | 2.37317700  |
| C  | 4.30635200  | -1.07003800 | -1.09629200 |
| C  | 4.78102800  | -2.13858500 | -0.33123900 |
| C  | 4.29043600  | -2.38112100 | 0.95468300  |
| C  | 3.30318600  | -1.54669200 | 1.48702100  |
| C  | 2.82930400  | -0.48083000 | 0.72759800  |
| C  | 3.31863100  | -0.22353500 | -0.55524100 |
| H  | 5.54263700  | -2.80302100 | -0.72624400 |
| H  | 2.90458200  | -1.73189300 | 2.48202400  |
| H  | 2.04478600  | 0.15285600  | 1.12128900  |
| C  | 4.85035200  | -0.86529800 | -2.49090300 |
| H  | 5.60522500  | -1.61849700 | -2.72741300 |
| H  | 4.06127700  | -0.93600300 | -3.24818900 |
| H  | 5.31801300  | 0.11961200  | -2.60515300 |
| C  | 2.72224000  | 0.90931000  | -1.36268000 |
| H  | 1.79357600  | 0.56237100  | -1.83174500 |
| H  | 3.40006000  | 1.21226100  | -2.16809500 |
| N  | 2.40585700  | 2.08952100  | -0.55649700 |
| C  | 1.17192700  | 2.61257100  | -0.58656300 |
| O  | 0.78444200  | 3.67724400  | -0.07187200 |
| C  | -0.00462000 | 1.97855600  | -1.18214600 |
| H  | -0.35525800 | 2.46148200  | -2.10111300 |
| C  | 3.52846800  | 2.81204200  | 0.08797000  |
| C  | 3.27422300  | 3.03856000  | 1.58062000  |
| C  | 3.84160000  | 4.10884800  | -0.66603000 |
| H  | 4.37883600  | 2.13042800  | -0.00998500 |
| H  | 3.09376900  | 2.08699300  | 2.08607000  |
| H  | 4.15312500  | 3.50858500  | 2.03260800  |

|   |             |             |             |
|---|-------------|-------------|-------------|
| H | 2.40996300  | 3.68631200  | 1.73330300  |
| H | 4.03528800  | 3.90782300  | -1.72462700 |
| H | 3.00402800  | 4.80575600  | -0.59069800 |
| H | 4.73078600  | 4.58449900  | -0.24144500 |
| O | 4.81120700  | -3.44275000 | 1.63556600  |
| H | 4.37457800  | -3.51116800 | 2.49452700  |
| C | -4.58980000 | 2.34814200  | 1.39233600  |
| H | -4.09843000 | 3.18684900  | 1.89027900  |
| H | -5.10619600 | 2.74258800  | 0.51151100  |
| H | -5.31487000 | 1.87714500  | 2.05591900  |
| C | 0.26219800  | 0.03984300  | 3.68610600  |
| H | 1.33687400  | 0.13584800  | 3.51266200  |
| H | -0.07655800 | 0.96865200  | 4.15578500  |
| H | 0.05395300  | -0.79782700 | 4.35152900  |
| C | 1.08048300  | -3.09360000 | -1.22421000 |
| H | 1.33331500  | -2.89044600 | -2.26736800 |
| H | 1.98402300  | -2.93534700 | -0.62903500 |
| H | 0.73881000  | -4.12200200 | -1.10836700 |
| C | -3.81200500 | -0.60809200 | -3.49997300 |
| H | -4.52268000 | 0.22391200  | -3.53532600 |
| H | -3.12853400 | -0.49704100 | -4.34448700 |
| H | -4.35825600 | -1.54872900 | -3.56812300 |

### CP3

|                                              |                             |
|----------------------------------------------|-----------------------------|
| Zero-point correction=                       | 0.490666 (Hartree/Particle) |
| Thermal correction to Energy=                | 0.528389                    |
| Thermal correction to Enthalpy=              | 0.529333                    |
| Thermal correction to Gibbs Free Energy=     | 0.422379                    |
| Sum of electronic and zero-point Energies=   | -1845.517203                |
| Sum of electronic and thermal Energies=      | -1845.479480                |
| Sum of electronic and thermal Enthalpies=    | -1845.478536                |
| Sum of electronic and thermal Free Energies= | -1845.585490                |

|    |             |             |             |
|----|-------------|-------------|-------------|
| Rh | 1.18139100  | 0.38525900  | -0.44666400 |
| Rh | 2.63879700  | -0.99920300 | 0.97564900  |
| O  | -0.41082400 | -0.69877500 | 0.28262300  |
| O  | 1.06582600  | 1.67010400  | 1.17512600  |
| O  | 1.45840400  | -1.04530000 | -1.89618700 |
| O  | 2.86518300  | 1.37691100  | -1.08881500 |
| O  | 4.22059900  | 0.07533500  | 0.19228600  |
| O  | 2.42663700  | 0.40146600  | 2.47294300  |
| O  | 2.77825800  | -2.33803900 | -0.57650700 |
| O  | 0.92080500  | -1.94718200 | 1.63468900  |

|   |             |             |             |
|---|-------------|-------------|-------------|
| C | 2.16869900  | -2.08032200 | -1.65563000 |
| C | 1.69974400  | 1.41045400  | 2.25771800  |
| C | 4.00604300  | 0.99901800  | -0.64560300 |
| C | -0.20016500 | -1.61521200 | 1.15384400  |
| C | -4.20865900 | -0.97424900 | -0.73366000 |
| C | -4.93722100 | -1.72893700 | 0.18644100  |
| C | -5.97210300 | -1.16205200 | 0.93794800  |
| C | -6.30362600 | 0.18202600  | 0.76056900  |
| C | -5.57860900 | 0.93890400  | -0.15799100 |
| C | -4.52901600 | 0.39244700  | -0.89902200 |
| H | -4.71648400 | -2.78189400 | 0.32912400  |
| H | -7.11614300 | 0.63036500  | 1.32714200  |
| H | -5.83434100 | 1.98649400  | -0.29600500 |
| C | -3.09261400 | -1.62718700 | -1.50853100 |
| H | -3.14865000 | -2.71494300 | -1.41625200 |
| H | -3.12499100 | -1.37327000 | -2.57128900 |
| H | -2.11631800 | -1.30318600 | -1.13748400 |
| C | -3.73696100 | 1.28503300  | -1.82428800 |
| H | -4.30691300 | 2.19823100  | -2.02991000 |
| H | -3.52816400 | 0.79921100  | -2.77828400 |
| N | -2.42960300 | 1.68660200  | -1.27023700 |
| C | -1.32637500 | 1.32756400  | -1.93724000 |
| O | -1.27565600 | 0.67965200  | -3.00448100 |
| C | 0.07099900  | 1.52743700  | -1.58154200 |
| H | 0.56758300  | 2.29843300  | -2.17971300 |
| C | -2.42158300 | 2.53706900  | -0.05663300 |
| C | -1.33229400 | 3.61253900  | -0.11684600 |
| C | -2.34269300 | 1.72258800  | 1.23932900  |
| H | -3.39242500 | 3.04510400  | -0.08596400 |
| H | -1.50001800 | 4.33429400  | 0.68826700  |
| H | -0.33614800 | 3.18954300  | 0.04911800  |
| H | -1.35346600 | 4.15162500  | -1.06847800 |
| H | -2.44823200 | 2.39896100  | 2.09462700  |
| H | -3.14058600 | 0.98063800  | 1.28642900  |
| H | -1.38205300 | 1.21461400  | 1.31007500  |
| O | -6.62353900 | -1.97686000 | 1.81769900  |
| H | -7.31608500 | -1.47164700 | 2.26270500  |
| C | 5.20324500  | 1.72660000  | -1.20951800 |
| H | 6.08812200  | 1.52507500  | -0.60596500 |
| H | 5.37866600  | 1.37805900  | -2.23242500 |
| H | 5.00295800  | 2.79924100  | -1.25416100 |
| C | 2.25910900  | -3.08511600 | -2.77827000 |
| H | 3.00729700  | -3.84363700 | -2.54888900 |
| H | 1.28234800  | -3.56088400 | -2.90941000 |

|   |             |             |             |
|---|-------------|-------------|-------------|
| H | 2.50305000  | -2.57422400 | -3.71251500 |
| C | -1.41862500 | -2.37683200 | 1.61723500  |
| H | -2.30622100 | -1.74380700 | 1.58146900  |
| H | -1.58006400 | -3.22204100 | 0.93978700  |
| H | -1.25621300 | -2.76821100 | 2.62206800  |
| C | 1.54061700  | 2.42534900  | 3.36415800  |
| H | 2.08451900  | 2.10700500  | 4.25298900  |
| H | 1.91599100  | 3.39485900  | 3.02436200  |
| H | 0.47875000  | 2.54605500  | 3.59609400  |

### TS3

|                                              |                             |
|----------------------------------------------|-----------------------------|
| Zero-point correction=                       | 0.489452 (Hartree/Particle) |
| Thermal correction to Energy=                | 0.526086                    |
| Thermal correction to Enthalpy=              | 0.527030                    |
| Thermal correction to Gibbs Free Energy=     | 0.422351                    |
| Sum of electronic and zero-point Energies=   | -1845.503210                |
| Sum of electronic and thermal Energies=      | -1845.466576                |
| Sum of electronic and thermal Enthalpies=    | -1845.465632                |
| Sum of electronic and thermal Free Energies= | -1845.570311                |

|    |             |             |             |
|----|-------------|-------------|-------------|
| Rh | 1.16782200  | 0.54440000  | -0.20204100 |
| Rh | 2.51040000  | -1.35932300 | 0.52546700  |
| O  | -0.39441800 | -0.26277300 | 0.88555400  |
| O  | 1.79826200  | 1.53705700  | 1.50958900  |
| O  | 0.63305800  | -0.58816100 | -1.82823600 |
| O  | 2.82453000  | 1.23514500  | -1.21327300 |
| O  | 4.07568900  | -0.53472800 | -0.53322500 |
| O  | 3.04127500  | -0.23885000 | 2.18083800  |
| O  | 1.89354000  | -2.35617900 | -1.16298700 |
| O  | 0.83827900  | -2.06045900 | 1.51638800  |
| C  | 1.09011400  | -1.77125000 | -1.95360500 |
| C  | 2.59465700  | 0.93576600  | 2.31313900  |
| C  | 3.90020500  | 0.54678700  | -1.17099400 |
| C  | -0.22940800 | -1.38295700 | 1.48378100  |
| C  | -3.95345600 | -0.70626200 | -0.74725600 |
| C  | -4.68602300 | -1.70614700 | -0.10430100 |
| C  | -5.86255000 | -1.41574600 | 0.59340900  |
| C  | -6.33217600 | -0.10264500 | 0.64377600  |
| C  | -5.60156200 | 0.89854600  | 0.00557600  |
| C  | -4.41504200 | 0.62750900  | -0.67845700 |
| H  | -4.35633900 | -2.73955300 | -0.14857100 |
| H  | -7.25322700 | 0.13555200  | 1.17048800  |
| H  | -5.96483500 | 1.92281400  | 0.04731900  |

|   |             |             |             |
|---|-------------|-------------|-------------|
| C | -2.68656400 | -1.07266700 | -1.47571300 |
| H | -2.65562700 | -2.14814300 | -1.67214300 |
| H | -2.57986700 | -0.54203800 | -2.42449800 |
| H | -1.80835200 | -0.80897700 | -0.88239500 |
| C | -3.66350200 | 1.76719500  | -1.33357100 |
| H | -4.25558400 | 2.68824500  | -1.24126700 |
| H | -3.50895700 | 1.57907400  | -2.39972800 |
| N | -2.32712200 | 2.01041800  | -0.79624300 |
| C | -1.23924300 | 1.94850200  | -1.63839500 |
| O | -1.28295200 | 1.60121900  | -2.81268800 |
| C | 0.03557200  | 2.25387800  | -0.93829400 |
| H | 0.81120400  | 2.77099300  | -1.51219900 |
| C | -2.16118900 | 2.71236700  | 0.47464600  |
| C | -0.66703200 | 3.04007600  | 0.65048900  |
| C | -2.65705000 | 1.93744100  | 1.69832500  |
| H | -2.71959100 | 3.65991500  | 0.40709300  |
| H | -0.50446500 | 4.09036900  | 0.93400800  |
| H | -0.10401900 | 2.41545700  | 1.33478800  |
| H | -0.18387400 | 3.37970100  | -0.45387100 |
| H | -2.42730600 | 2.50493700  | 2.60745900  |
| H | -3.73444100 | 1.77961000  | 1.65649800  |
| H | -2.15344600 | 0.97119900  | 1.73684700  |
| O | -6.50836100 | -2.45828600 | 1.19477300  |
| H | -7.30846400 | -2.12741300 | 1.62267200  |
| C | 5.05983700  | 1.06745500  | -1.98650600 |
| H | 5.99652200  | 0.63630300  | -1.63250200 |
| H | 4.91081600  | 0.77810100  | -3.03208100 |
| H | 5.09440000  | 2.15770400  | -1.94216900 |
| C | 0.59058500  | -2.55049400 | -3.14581800 |
| H | 1.27722900  | -3.36312200 | -3.38487900 |
| H | -0.38753200 | -2.97641600 | -2.89861100 |
| H | 0.45889000  | -1.88375500 | -3.99947400 |
| C | -1.43072500 | -1.91868900 | 2.22615600  |
| H | -2.33251000 | -1.79459100 | 1.62183200  |
| H | -1.28155100 | -2.96714700 | 2.48378300  |
| H | -1.56674200 | -1.34275500 | 3.14783600  |
| C | 3.05423900  | 1.72853700  | 3.51434700  |
| H | 3.50598900  | 1.06880400  | 4.25497300  |
| H | 3.79776900  | 2.46392400  | 3.18992700  |
| H | 2.21441900  | 2.27469700  | 3.95010200  |

### 5a+[Rh]

Zero-point correction=

0.493698 (Hartree/Particle)



|                                              |              |
|----------------------------------------------|--------------|
| Thermal correction to Energy=                | 0.530025     |
| Thermal correction to Enthalpy=              | 0.530970     |
| Thermal correction to Gibbs Free Energy=     | 0.425962     |
| Sum of electronic and zero-point Energies=   | -1845.607615 |
| Sum of electronic and thermal Energies=      | -1845.571288 |
| Sum of electronic and thermal Enthalpies=    | -1845.570344 |
| Sum of electronic and thermal Free Energies= | -1845.675351 |

|    |             |             |             |
|----|-------------|-------------|-------------|
| Rh | 1.30054500  | 0.58350200  | -0.19967600 |
| Rh | 2.45484800  | -1.39626000 | 0.48118600  |
| O  | -0.33362700 | -0.10195600 | 0.84612400  |
| O  | 1.97617700  | 1.49995300  | 1.51579300  |
| O  | 0.69356300  | -0.43278900 | -1.86635500 |
| O  | 3.00549800  | 1.16221400  | -1.18517000 |
| O  | 4.09896600  | -0.71677100 | -0.54019700 |
| O  | 3.07320800  | -0.37853200 | 2.15697700  |
| O  | 1.77670000  | -2.31635900 | -1.22072400 |
| O  | 0.75336800  | -1.99072300 | 1.46338900  |
| C  | 1.04237800  | -1.64636500 | -2.01961400 |
| C  | 2.71658900  | 0.83306600  | 2.31104200  |
| C  | 4.02230700  | 0.39486700  | -1.15623000 |
| C  | -0.26465300 | -1.22954100 | 1.44194500  |
| C  | -3.86619600 | -0.77896400 | -0.78758200 |
| C  | -4.45344000 | -1.90437200 | -0.20468900 |
| C  | -5.62684700 | -1.80656000 | 0.54938900  |
| C  | -6.23965900 | -0.56456300 | 0.71762200  |
| C  | -5.65533500 | 0.55958000  | 0.13607700  |
| C  | -4.47370300 | 0.48274700  | -0.60348100 |
| H  | -4.00946000 | -2.88585400 | -0.34044200 |
| H  | -7.15950900 | -0.47507200 | 1.29076600  |
| H  | -6.13360800 | 1.52742500  | 0.26608800  |
| C  | -2.59205400 | -0.93568600 | -1.57530000 |
| H  | -2.42525600 | -1.98564900 | -1.83222800 |
| H  | -2.59092800 | -0.34517000 | -2.49425300 |
| H  | -1.73566500 | -0.58460200 | -0.99669600 |
| C  | -3.89545900 | 1.74442900  | -1.21020000 |
| H  | -4.60522200 | 2.56908800  | -1.05912300 |
| H  | -3.74933900 | 1.62690400  | -2.28815100 |
| N  | -2.59564800 | 2.15297400  | -0.68884700 |
| C  | -1.52664400 | 2.30057100  | -1.53562400 |
| O  | -1.48729000 | 1.94148400  | -2.70439300 |
| C  | -0.42368900 | 3.03063800  | -0.77850600 |
| H  | 0.54169600  | 2.50320500  | -0.88201400 |
| C  | -2.45157800 | 2.86466100  | 0.58595400  |

|   |             |             |             |
|---|-------------|-------------|-------------|
| C | -0.93442400 | 3.17126300  | 0.65918000  |
| C | -2.93451400 | 2.07105600  | 1.79660400  |
| H | -3.02729600 | 3.80321400  | 0.52186000  |
| H | -0.75206400 | 4.16314900  | 1.07827400  |
| H | -0.45169500 | 2.44209600  | 1.31100500  |
| H | -0.25123000 | 3.99065000  | -1.27741100 |
| H | -2.69144800 | 2.62558900  | 2.70979000  |
| H | -4.01155700 | 1.89706100  | 1.77962600  |
| H | -2.42570900 | 1.10549200  | 1.82380000  |
| O | -6.12573000 | -2.95988800 | 1.08662400  |
| H | -6.94081700 | -2.75616700 | 1.56292400  |
| C | 5.22906200  | 0.82984100  | -1.94774300 |
| H | 6.13486100  | 0.38692600  | -1.53238000 |
| H | 5.11285400  | 0.48204500  | -2.97967200 |
| H | 5.29823100  | 1.91850500  | -1.96200900 |
| C | 0.52589800  | -2.35999700 | -3.24181100 |
| H | 1.34638600  | -2.88274000 | -3.73896500 |
| H | -0.20494100 | -3.11210500 | -2.92910100 |
| H | 0.05098700  | -1.65191400 | -3.92012000 |
| C | -1.49554700 | -1.68055500 | 2.18363500  |
| H | -2.37066800 | -1.59809800 | 1.53424900  |
| H | -1.37577000 | -2.70547100 | 2.53370400  |
| H | -1.65736900 | -1.01953900 | 3.04092000  |
| C | 3.24095800  | 1.55597100  | 3.52596600  |
| H | 3.43609800  | 0.84843300  | 4.33260800  |
| H | 4.18358200  | 2.04643300  | 3.26065700  |
| H | 2.53433100  | 2.32386100  | 3.84393300  |

#### CP4

|                                              |                             |
|----------------------------------------------|-----------------------------|
| Zero-point correction=                       | 0.490682 (Hartree/Particle) |
| Thermal correction to Energy=                | 0.527551                    |
| Thermal correction to Enthalpy=              | 0.528495                    |
| Thermal correction to Gibbs Free Energy=     | 0.424266                    |
| Sum of electronic and zero-point Energies=   | -1845.518461                |
| Sum of electronic and thermal Energies=      | -1845.481593                |
| Sum of electronic and thermal Enthalpies=    | -1845.480649                |
| Sum of electronic and thermal Free Energies= | -1845.584878                |

|    |             |             |             |
|----|-------------|-------------|-------------|
| Rh | -1.22149700 | 0.34035300  | 0.51390000  |
| Rh | -2.67489600 | -0.85235300 | -1.07666200 |
| O  | 0.33863700  | -0.80273700 | -0.19962200 |
| O  | -0.92351400 | 1.70663300  | -1.02098200 |
| O  | -1.67377000 | -1.14718600 | 1.85483800  |

|   |             |             |             |
|---|-------------|-------------|-------------|
| O | -2.87506400 | 1.39993900  | 1.12292900  |
| O | -4.22352200 | 0.29991000  | -0.34076200 |
| O | -2.25661400 | 0.59421900  | -2.48159700 |
| O | -3.01772200 | -2.24782700 | 0.39327700  |
| O | -0.99514600 | -1.90216500 | -1.67334700 |
| C | -2.46136900 | -2.09763400 | 1.51999000  |
| C | -1.47787100 | 1.53516000  | -2.16260600 |
| C | -4.00431800 | 1.14702000  | 0.57295200  |
| C | 0.11582000  | -1.67070700 | -1.11758400 |
| C | 4.17414500  | -1.03811400 | 0.74262600  |
| C | 4.92048800  | -1.82706500 | -0.13429700 |
| C | 5.97031800  | -1.28957000 | -0.88562800 |
| C | 6.30078700  | 0.05983000  | -0.74998900 |
| C | 5.55526200  | 0.85102200  | 0.12187900  |
| C | 4.48656900  | 0.33490600  | 0.85737100  |
| H | 4.70425800  | -2.88562900 | -0.23770300 |
| H | 7.12738400  | 0.48599700  | -1.31337200 |
| H | 5.80923300  | 1.90307800  | 0.22506600  |
| C | 3.05550300  | -1.66710500 | 1.53289500  |
| H | 3.13381300  | -2.75711700 | 1.50572800  |
| H | 3.05999000  | -1.34916900 | 2.57850900  |
| H | 2.08091400  | -1.38488500 | 1.12547200  |
| C | 3.69262500  | 1.26187700  | 1.74916700  |
| H | 4.22810900  | 2.21009500  | 1.85572400  |
| H | 3.56930600  | 0.84272100  | 2.75055200  |
| N | 2.32894600  | 1.54634000  | 1.27498600  |
| C | 1.29565400  | 1.19343700  | 2.05502800  |
| O | 1.33689600  | 0.59637500  | 3.14622700  |
| C | -0.11563600 | 1.38524100  | 1.72893000  |
| H | -0.61076700 | 2.14629900  | 2.34244600  |
| C | 2.06862000  | 2.34613700  | 0.05970700  |
| C | 2.38497100  | 1.59450600  | -1.23590800 |
| C | 2.76855100  | 3.70606200  | 0.13257600  |
| H | 0.98665700  | 2.52219900  | 0.06205800  |
| H | 1.89710000  | 0.62066200  | -1.22581700 |
| H | 1.99675900  | 2.17146500  | -2.08115400 |
| H | 3.45798400  | 1.45548800  | -1.37667700 |
| H | 2.43354900  | 4.33311400  | -0.69852100 |
| H | 2.53720000  | 4.22301700  | 1.06890700  |
| H | 3.85508600  | 3.60615500  | 0.04967000  |
| O | 6.63919700  | -2.13655500 | -1.72138900 |
| H | 7.34239700  | -1.64823400 | -2.16847900 |
| C | -5.17886400 | 1.93937000  | 1.09525700  |
| H | -5.39850900 | 1.61822700  | 2.11820000  |

|   |             |             |             |
|---|-------------|-------------|-------------|
| H | -4.92374100 | 3.00117100  | 1.13085100  |
| H | -6.05473400 | 1.77813000  | 0.46730400  |
| C | -2.75811800 | -3.11227100 | 2.59681600  |
| H | -1.84757600 | -3.34509700 | 3.15229100  |
| H | -3.47671600 | -2.67976700 | 3.30052100  |
| H | -3.18663400 | -4.01357400 | 2.15829200  |
| C | 1.30411000  | -2.49994800 | -1.54218500 |
| H | 1.41708400  | -3.33185600 | -0.83900200 |
| H | 1.14061600  | -2.90723700 | -2.54013700 |
| H | 2.22180700  | -1.91004000 | -1.50653300 |
| C | -1.12802800 | 2.55365500  | -3.22097600 |
| H | -0.13151200 | 2.32465100  | -3.61302900 |
| H | -1.84790800 | 2.51140600  | -4.03832700 |
| H | -1.09640900 | 3.55467300  | -2.78619200 |

## TS2

|                                              |                             |
|----------------------------------------------|-----------------------------|
| Zero-point correction=                       | 0.485721 (Hartree/Particle) |
| Thermal correction to Energy=                | 0.523220                    |
| Thermal correction to Enthalpy=              | 0.524164                    |
| Thermal correction to Gibbs Free Energy=     | 0.417354                    |
| Sum of electronic and zero-point Energies=   | -1845.506070                |
| Sum of electronic and thermal Energies=      | -1845.468571                |
| Sum of electronic and thermal Enthalpies=    | -1845.467627                |
| Sum of electronic and thermal Free Energies= | -1845.574437                |

|    |             |             |             |
|----|-------------|-------------|-------------|
| Rh | 1.17868000  | 0.51949100  | -0.15536500 |
| Rh | 2.80341000  | -1.20788300 | 0.49248100  |
| O  | -0.30766500 | -0.88697400 | 0.19832600  |
| O  | 1.11577600  | 1.08845300  | 1.83721000  |
| O  | 1.36905800  | -0.18550700 | -2.07591900 |
| O  | 2.77065300  | 1.78865000  | -0.45757100 |
| O  | 4.27754000  | 0.18090800  | 0.10264700  |
| O  | 2.64324900  | -0.48703000 | 2.42481600  |
| O  | 2.84722700  | -1.80500600 | -1.47723300 |
| O  | 1.19408800  | -2.46763600 | 0.83221100  |
| C  | 2.14208200  | -1.16969700 | -2.31995200 |
| C  | 1.86766600  | 0.48052400  | 2.67435500  |
| C  | 3.95566100  | 1.34446800  | -0.28288600 |
| C  | 0.02146300  | -2.05504400 | 0.61131200  |
| C  | -4.28962800 | -0.84205800 | -0.83730900 |
| C  | -5.05211500 | -1.75865400 | -0.11448900 |
| C  | -6.12973300 | -1.34618100 | 0.67806300  |
| C  | -6.46483300 | 0.00714000  | 0.74896700  |

|   |             |             |             |
|---|-------------|-------------|-------------|
| C | -5.70448200 | 0.92819300  | 0.02877800  |
| C | -4.62244700 | 0.53118000  | -0.75944800 |
| H | -4.82575600 | -2.81900600 | -0.16208800 |
| H | -7.30807700 | 0.33681900  | 1.35092700  |
| H | -5.96921300 | 1.98230100  | 0.07440300  |
| C | -3.12559200 | -1.32452100 | -1.66471700 |
| H | -3.17792900 | -2.40696600 | -1.80528600 |
| H | -3.09767800 | -0.85307000 | -2.65074900 |
| H | -2.17429100 | -1.08813200 | -1.17821300 |
| C | -3.78168200 | 1.56988300  | -1.45534400 |
| H | -4.29542200 | 2.53926400  | -1.46198100 |
| H | -3.55105300 | 1.31090600  | -2.49342200 |
| N | -2.45979700 | 1.68749600  | -0.82621400 |
| C | -1.27333200 | 1.66457000  | -1.60670900 |
| O | -1.29522600 | 1.38185900  | -2.78925800 |
| C | -0.11402500 | 2.04753700  | -0.78347300 |
| H | 0.49562100  | 2.83562800  | -1.23148600 |
| C | -2.31447500 | 2.23839100  | 0.44423100  |
| C | -2.10355800 | 1.31116800  | 1.58268700  |
| C | -2.88865000 | 3.59218800  | 0.70560000  |
| H | -0.57314100 | 2.42264400  | 0.19783600  |
| H | -1.42857600 | 0.49645400  | 1.31835300  |
| H | -1.78105900 | 1.81980600  | 2.49208700  |
| H | -3.09789900 | 0.85878100  | 1.75252900  |
| H | -2.38567100 | 4.07409000  | 1.54713400  |
| H | -2.84406000 | 4.22990800  | -0.17898000 |
| H | -3.94518100 | 3.47160800  | 0.99177000  |
| O | -6.81448500 | -2.31506200 | 1.35071400  |
| H | -7.54013100 | -1.90866200 | 1.84187600  |
| C | 5.07818700  | 2.30556500  | -0.59888400 |
| H | 5.23415600  | 2.31957000  | -1.68270800 |
| H | 4.80898100  | 3.31628700  | -0.28624300 |
| H | 6.00052700  | 1.98377500  | -0.11471600 |
| C | 2.24032300  | -1.59204300 | -3.76694800 |
| H | 1.29175500  | -1.41516700 | -4.27604200 |
| H | 3.00831400  | -0.98484600 | -4.25781000 |
| H | 2.53239000  | -2.64072500 | -3.83528100 |
| C | -1.11283500 | -3.03227600 | 0.82281600  |
| H | -1.27103400 | -3.59039900 | -0.10595700 |
| H | -0.85274300 | -3.74375300 | 1.60762200  |
| H | -2.03838700 | -2.50728300 | 1.06495900  |
| C | 1.82903900  | 0.99502400  | 4.09553500  |
| H | 0.79642500  | 1.18079400  | 4.40053000  |
| H | 2.30361200  | 0.28329600  | 4.77094400  |

|   |            |            |            |
|---|------------|------------|------------|
| H | 2.36615400 | 1.94787900 | 4.14263200 |
|---|------------|------------|------------|

#### 4a+[Rh]

|                                              |  |  |                             |
|----------------------------------------------|--|--|-----------------------------|
| Zero-point correction=                       |  |  | 0.491416 (Hartree/Particle) |
| Thermal correction to Energy=                |  |  | 0.528373                    |
| Thermal correction to Enthalpy=              |  |  | 0.529317                    |
| Thermal correction to Gibbs Free Energy=     |  |  | 0.423257                    |
| Sum of electronic and zero-point Energies=   |  |  | -1845.604588                |
| Sum of electronic and thermal Energies=      |  |  | -1845.567631                |
| Sum of electronic and thermal Enthalpies=    |  |  | -1845.566686                |
| Sum of electronic and thermal Free Energies= |  |  | -1845.672747                |

|    |             |             |             |
|----|-------------|-------------|-------------|
| Rh | 1.21775400  | 0.23458000  | -0.47787300 |
| Rh | 2.99553500  | -0.75951000 | 0.81271100  |
| O  | -0.01547400 | -0.01960600 | 1.17044000  |
| O  | 1.79732300  | 2.07124500  | 0.26296100  |
| O  | 0.73568600  | -1.65956300 | -1.12801100 |
| O  | 2.54704500  | 0.43064100  | -2.02931700 |
| O  | 4.22203900  | -0.50066900 | -0.81120900 |
| O  | 3.47472800  | 1.13246600  | 1.47033300  |
| O  | 2.41260900  | -2.59255400 | 0.08407300  |
| O  | 1.65485600  | -0.97236100 | 2.37139300  |
| C  | 1.41921500  | -2.64821300 | -0.70794000 |
| C  | 2.78653600  | 2.12029000  | 1.06592400  |
| C  | 3.74156900  | 0.02078600  | -1.86812700 |
| C  | 0.46118300  | -0.57774600 | 2.21607300  |
| C  | -3.99089600 | -1.18917000 | -0.43218500 |
| C  | -4.86469800 | -1.96805400 | 0.32689200  |
| C  | -6.21875500 | -1.63999900 | 0.44487800  |
| C  | -6.72281200 | -0.51765500 | -0.21509700 |
| C  | -5.85472000 | 0.26144600  | -0.97771200 |
| C  | -4.49867700 | -0.04882200 | -1.09439600 |
| H  | -4.50399700 | -2.85348900 | 0.84076900  |
| H  | -7.77615600 | -0.25868100 | -0.13931300 |
| H  | -6.24384700 | 1.13608900  | -1.49322900 |
| C  | -2.53373700 | -1.56915000 | -0.50407500 |
| H  | -2.39289200 | -2.61210400 | -0.20792900 |
| H  | -2.10959100 | -1.44539500 | -1.50325200 |
| H  | -1.91867800 | -0.95360200 | 0.15944300  |
| C  | -3.59994800 | 0.86980700  | -1.88926600 |
| H  | -4.21076300 | 1.56086400  | -2.48169400 |
| H  | -2.95879500 | 0.31893000  | -2.58413100 |
| N  | -2.69226300 | 1.63816500  | -1.05154800 |

|   |             |             |             |
|---|-------------|-------------|-------------|
| C | -1.34765900 | 1.66272200  | -0.99451400 |
| O | -0.51214500 | 1.03730500  | -1.65822400 |
| C | -1.33127400 | 2.67764700  | 0.14231100  |
| H | -0.85602000 | 2.31052800  | 1.05070500  |
| C | -2.89381500 | 2.58012000  | 0.09356100  |
| C | -3.50255500 | 1.91628500  | 1.32623100  |
| C | -3.62986200 | 3.84852500  | -0.31653300 |
| H | -0.91052700 | 3.64405000  | -0.14240800 |
| H | -2.96724600 | 0.99475500  | 1.56773400  |
| H | -3.42715300 | 2.59743900  | 2.18051700  |
| H | -4.55593500 | 1.67136800  | 1.17170900  |
| H | -3.61337900 | 4.57891400  | 0.49829900  |
| H | -3.16749800 | 4.30176700  | -1.19842400 |
| H | -4.67810100 | 3.63096900  | -0.54807900 |
| O | -6.99580600 | -2.45782000 | 1.21362200  |
| H | -7.90490000 | -2.13188800 | 1.20135300  |
| C | 4.66552300  | 0.13635600  | -3.05620400 |
| H | 4.58062100  | -0.77627800 | -3.65565800 |
| H | 4.37611900  | 0.98349200  | -3.67948200 |
| H | 5.69950600  | 0.23348600  | -2.72257400 |
| C | 0.98201100  | -4.01679300 | -1.17296800 |
| H | 0.14747800  | -4.35086200 | -0.54721100 |
| H | 0.63008000  | -3.96750600 | -2.20488800 |
| H | 1.79964500  | -4.73152200 | -1.07587000 |
| C | -0.50706100 | -0.79534100 | 3.35464200  |
| H | 0.01830900  | -1.13248300 | 4.24777900  |
| H | -1.05207200 | 0.12948300  | 3.56050500  |
| H | -1.24166700 | -1.55035000 | 3.05676700  |
| C | 3.14871300  | 3.48196000  | 1.61017400  |
| H | 2.98718400  | 4.24679500  | 0.84853100  |
| H | 2.49771300  | 3.70689800  | 2.46189100  |
| H | 4.18379700  | 3.49034900  | 1.95276300  |

## CP5

|                                              |                             |
|----------------------------------------------|-----------------------------|
| Zero-point correction=                       | 0.489870 (Hartree/Particle) |
| Thermal correction to Energy=                | 0.527132                    |
| Thermal correction to Enthalpy=              | 0.528077                    |
| Thermal correction to Gibbs Free Energy=     | 0.422395                    |
| Sum of electronic and zero-point Energies=   | -1845.517602                |
| Sum of electronic and thermal Energies=      | -1845.480339                |
| Sum of electronic and thermal Enthalpies=    | -1845.479395                |
| Sum of electronic and thermal Free Energies= | -1845.585077                |

|    |             |             |             |
|----|-------------|-------------|-------------|
| Rh | -0.50941500 | -0.02077000 | -0.35560600 |
| Rh | -2.79941700 | 0.14360200  | 0.54624500  |
| O  | -1.09239800 | -1.84748800 | -1.10695100 |
| O  | -3.21933400 | -1.66764800 | -0.33025100 |
| O  | -0.16867400 | 1.82861400  | 0.49448400  |
| O  | -2.25972600 | 1.95832900  | 1.36883000  |
| O  | -2.10448200 | -0.85376300 | 2.22399600  |
| O  | 0.00532000  | -1.00301500 | 1.39520400  |
| O  | -1.20547500 | 0.95378200  | -2.02808200 |
| O  | -3.31677500 | 1.10948500  | -1.19864700 |
| C  | -2.28670500 | -2.26760200 | -0.94266500 |
| C  | -2.43621200 | 1.29902000  | -2.08764800 |
| C  | -0.89642300 | -1.21294200 | 2.28267200  |
| C  | -1.09703700 | 2.40766300  | 1.15466100  |
| C  | -0.43064000 | -1.94475400 | 3.51985300  |
| H  | 0.25735300  | -1.30230100 | 4.07908000  |
| H  | -1.27923500 | -2.20372500 | 4.15236400  |
| H  | 0.11884200  | -2.84464200 | 3.23206900  |
| C  | -2.58598400 | -3.62897100 | -1.52310500 |
| H  | -2.09830200 | -3.73472800 | -2.49384300 |
| H  | -2.17461400 | -4.39466900 | -0.85716600 |
| H  | -3.66292500 | -3.77518000 | -1.60900700 |
| C  | -0.74052700 | 3.74448800  | 1.76210600  |
| H  | 0.02831300  | 4.23892900  | 1.16710700  |
| H  | -1.63118400 | 4.36891000  | 1.84301600  |
| H  | -0.34655000 | 3.57917900  | 2.77061500  |
| C  | -2.85904800 | 1.99106200  | -3.36164800 |
| H  | -3.88792200 | 2.34081100  | -3.28055800 |
| H  | -2.18742700 | 2.82877500  | -3.56588000 |
| H  | -2.77247200 | 1.28836700  | -4.19579400 |
| C  | 1.24692800  | -0.17710600 | -1.23470400 |
| C  | 1.95938000  | -1.46297400 | -1.34043000 |
| C  | 3.25802400  | -3.24671800 | -0.30777200 |
| O  | 1.61761400  | -2.14432200 | -2.31365000 |
| N  | 2.84291500  | -1.83897800 | -0.38155600 |
| C  | 3.10496600  | -0.92924700 | 0.73398800  |
| H  | 4.05394100  | -1.23220000 | 1.19046400  |
| H  | 2.32342900  | -1.03048900 | 1.48829800  |
| C  | 3.19803000  | 0.51137400  | 0.26690500  |
| C  | 2.78059800  | 1.57590100  | 1.10717600  |
| C  | 3.86948200  | 0.82279900  | -0.93013600 |
| C  | 2.97510000  | 2.88682200  | 0.68645600  |
| C  | 4.05418400  | 2.13495400  | -1.34635400 |
| H  | 4.23778600  | 0.01224900  | -1.55046900 |



|   |            |             |             |
|---|------------|-------------|-------------|
| C | 3.58900300 | 3.17542200  | -0.53655900 |
| H | 2.64595400 | 3.71476900  | 1.30481400  |
| H | 4.55611500 | 2.34843600  | -2.28667400 |
| H | 2.85099500 | -3.69420300 | -1.21780100 |
| C | 4.78177100 | -3.38553000 | -0.33240800 |
| H | 5.06043100 | -4.44299800 | -0.36771000 |
| H | 5.20132900 | -2.89011500 | -1.21243900 |
| H | 5.24731000 | -2.95497500 | 0.56083300  |
| C | 2.61847200 | -3.93160100 | 0.90597500  |
| H | 3.00518400 | -3.52338500 | 1.84622200  |
| H | 1.53383700 | -3.79265500 | 0.89009400  |
| H | 2.83572700 | -5.00399600 | 0.89462700  |
| O | 3.71539000 | 4.48713800  | -0.87541500 |
| H | 4.14601800 | 4.55368800  | -1.73775800 |
| C | 2.16950300 | 1.31243800  | 2.45830900  |
| H | 1.28884700 | 0.67476500  | 2.36571000  |
| H | 2.88201800 | 0.80910000  | 3.12314100  |
| H | 1.87297400 | 2.24864800  | 2.93546500  |
| H | 1.48240800 | 0.54317800  | -2.02088500 |

#### TS4

|                                              |                             |
|----------------------------------------------|-----------------------------|
| Zero-point correction=                       | 0.490433 (Hartree/Particle) |
| Thermal correction to Energy=                | 0.527553                    |
| Thermal correction to Enthalpy=              | 0.528498                    |
| Thermal correction to Gibbs Free Energy=     | 0.423213                    |
| Sum of electronic and zero-point Energies=   | -1845.521398                |
| Sum of electronic and thermal Energies=      | -1845.484278                |
| Sum of electronic and thermal Enthalpies=    | -1845.483334                |
| Sum of electronic and thermal Free Energies= | -1845.588619                |

|    |            |             |             |
|----|------------|-------------|-------------|
| Rh | 0.40418400 | -0.06576900 | -0.25211700 |
| Rh | 2.78205300 | -0.18000700 | 0.38478600  |
| O  | 0.85602100 | 1.78461200  | -1.04267200 |
| O  | 3.06997100 | 1.62348200  | -0.56112200 |
| O  | 0.17923400 | -1.91971100 | 0.62779000  |
| O  | 2.35000900 | -1.98857000 | 1.29126900  |
| O  | 2.27332000 | 0.84268500  | 2.11299400  |
| O  | 0.07529800 | 0.91959400  | 1.54710300  |
| O  | 0.93717100 | -1.02752800 | -1.99362900 |
| O  | 3.12496800 | -1.16146700 | -1.39154900 |
| C  | 2.05545200 | 2.21608300  | -1.03889600 |
| C  | 2.15682100 | -1.35569900 | -2.18532500 |
| C  | 1.07317600 | 1.18250800  | 2.30675300  |

|   |             |             |             |
|---|-------------|-------------|-------------|
| C | 1.18062100  | -2.46315800 | 1.20601200  |
| C | 0.75513200  | 1.98570400  | 3.54673800  |
| H | -0.06365100 | 1.51227800  | 4.09575100  |
| H | 1.63476700  | 2.07163800  | 4.18403400  |
| H | 0.41780200  | 2.98319100  | 3.24836500  |
| C | 2.26092500  | 3.58537400  | -1.64241800 |
| H | 1.61523300  | 3.70709000  | -2.51377700 |
| H | 1.97600600  | 4.34212400  | -0.90353700 |
| H | 3.30860700  | 3.73080000  | -1.90714700 |
| C | 0.91315700  | -3.78890500 | 1.88190700  |
| H | 0.50899200  | -3.60030400 | 2.88256500  |
| H | 0.17282400  | -4.35815100 | 1.31687600  |
| H | 1.83900000  | -4.35549700 | 1.98512300  |
| C | 2.46020300  | -2.02138000 | -3.50701500 |
| H | 3.45252500  | -2.47192000 | -3.48698000 |
| H | 1.70016300  | -2.77343000 | -3.72996800 |
| H | 2.42272100  | -1.26609700 | -4.29854500 |
| C | -1.49704800 | 0.02493600  | -1.05253500 |
| C | -2.00298800 | 1.38933400  | -1.36679900 |
| C | -2.89282000 | 3.38834000  | -0.26953000 |
| O | -1.66550800 | 1.97645100  | -2.39065000 |
| N | -2.79590300 | 1.92942700  | -0.38049500 |
| C | -3.03180400 | 1.05490800  | 0.76205200  |
| H | -3.99886200 | 1.30067000  | 1.21459900  |
| H | -2.25222800 | 1.16945800  | 1.51844300  |
| C | -3.04485400 | -0.38338500 | 0.24681400  |
| C | -2.68537800 | -1.47871000 | 1.11629100  |
| C | -3.89345500 | -0.69081200 | -0.86493200 |
| C | -2.96784300 | -2.77314000 | 0.72468500  |
| C | -4.17717100 | -1.98926300 | -1.23923400 |
| H | -4.28048900 | 0.13361700  | -1.45340400 |
| C | -3.67990400 | -3.04050900 | -0.45583800 |
| H | -2.65902300 | -3.61214200 | 1.33767700  |
| H | -4.77305600 | -2.19322700 | -2.12459800 |
| H | -2.76290600 | 3.74163500  | -1.29605100 |
| C | -4.26766600 | 3.82471400  | 0.23625900  |
| H | -4.35749400 | 4.91324200  | 0.17699900  |
| H | -5.06568100 | 3.38103400  | -0.36676100 |
| H | -4.42670000 | 3.54210200  | 1.28279300  |
| C | -1.74185300 | 3.94295700  | 0.58228700  |
| H | -1.81537100 | 3.59788700  | 1.61952500  |
| H | -0.78458200 | 3.60718600  | 0.17577100  |
| H | -1.76337800 | 5.03767100  | 0.58875800  |
| O | -3.88331700 | -4.33873500 | -0.76592200 |

|   |             |             |             |
|---|-------------|-------------|-------------|
| H | -4.38417000 | -4.40380700 | -1.59065800 |
| C | -2.07276500 | -1.22576400 | 2.46118200  |
| H | -2.79873000 | -0.72360600 | 3.11428300  |
| H | -1.78140700 | -2.16427800 | 2.93560400  |
| H | -1.19904700 | -0.57979000 | 2.37776100  |
| H | -1.62819700 | -0.70675400 | -1.84978400 |

## CP6

|                                              |                             |
|----------------------------------------------|-----------------------------|
| Zero-point correction=                       | 0.491156 (Hartree/Particle) |
| Thermal correction to Energy=                | 0.528681                    |
| Thermal correction to Enthalpy=              | 0.529625                    |
| Thermal correction to Gibbs Free Energy=     | 0.423369                    |
| Sum of electronic and zero-point Energies=   | -1845.536439                |
| Sum of electronic and thermal Energies=      | -1845.498914                |
| Sum of electronic and thermal Enthalpies=    | -1845.497969                |
| Sum of electronic and thermal Free Energies= | -1845.604226                |

|    |            |             |             |
|----|------------|-------------|-------------|
| Rh | 0.37830500 | -0.07421600 | -0.21133100 |
| Rh | 2.76839200 | -0.25769600 | 0.31298200  |
| O  | 0.83047200 | 1.78210200  | -0.98493800 |
| O  | 3.06034900 | 1.54913700  | -0.62178200 |
| O  | 0.13774800 | -1.94258100 | 0.63411300  |
| O  | 2.32937200 | -2.06909400 | 1.21449300  |
| O  | 2.37645200 | 0.74923600  | 2.07798800  |
| O  | 0.15484400 | 0.87417200  | 1.62673100  |
| O  | 0.80203700 | -0.99857800 | -2.00125500 |
| O  | 3.00575900 | -1.21544700 | -1.49208600 |
| C  | 2.03854000 | 2.17841200  | -1.04002900 |
| C  | 2.00006200 | -1.35576900 | -2.25333800 |
| C  | 1.19262100 | 1.10741300  | 2.33819100  |
| C  | 1.14601800 | -2.51613600 | 1.16815100  |
| C  | 0.95877200 | 1.90247700  | 3.60191000  |
| H  | 0.12426100 | 1.47394900  | 4.16341900  |
| H  | 1.85835000 | 1.92090200  | 4.21663500  |
| H  | 0.68144200 | 2.92582300  | 3.32959200  |
| C  | 2.25694000 | 3.54724900  | -1.63975400 |
| H  | 1.59079400 | 3.68538500  | -2.49330000 |
| H  | 2.00394700 | 4.30503900  | -0.89040800 |
| H  | 3.29967400 | 3.67482300  | -1.93160500 |
| C  | 0.87635000 | -3.84355900 | 1.84029300  |
| H  | 0.51777600 | -3.65750400 | 2.85873400  |
| H  | 0.10065800 | -4.38950900 | 1.30013900  |
| H  | 1.79191500 | -4.43270700 | 1.89976600  |

|   |             |             |             |
|---|-------------|-------------|-------------|
| C | 2.23897300  | -1.98118800 | -3.60741500 |
| H | 3.17473900  | -2.54071600 | -3.60840900 |
| H | 1.40107400  | -2.62674200 | -3.87766600 |
| H | 2.30198900  | -1.18311900 | -4.35446300 |
| C | -1.71725700 | -0.01036900 | -0.94386600 |
| C | -1.99940100 | 1.39174500  | -1.36223200 |
| C | -2.69884200 | 3.46826100  | -0.22336300 |
| O | -1.64225500 | 1.94050800  | -2.39545900 |
| N | -2.73408200 | 2.01240100  | -0.35662900 |
| C | -2.95809700 | 1.13304900  | 0.78043500  |
| H | -3.94411400 | 1.30483200  | 1.22531800  |
| H | -2.18750700 | 1.25654200  | 1.54649300  |
| C | -2.85754100 | -0.28610300 | 0.18118400  |
| C | -2.64557800 | -1.41575700 | 1.12599900  |
| C | -3.84287100 | -0.56813300 | -0.87695800 |
| C | -3.04680800 | -2.67230500 | 0.77480300  |
| C | -4.22163400 | -1.85279800 | -1.21743100 |
| H | -4.21435100 | 0.27716000  | -1.44341900 |
| C | -3.78220600 | -2.90992900 | -0.41603600 |
| H | -2.84645300 | -3.52010200 | 1.42010200  |
| H | -4.84708500 | -2.03842400 | -2.08617500 |
| H | -2.55521100 | 3.82249400  | -1.24830400 |
| C | -4.02620200 | 4.00552400  | 0.31299900  |
| H | -4.02480200 | 5.09945300  | 0.29787300  |
| H | -4.86441300 | 3.65317800  | -0.29574400 |
| H | -4.19824700 | 3.69377300  | 1.34967200  |
| C | -1.49547100 | 3.92092100  | 0.61676600  |
| H | -1.58481100 | 3.58126400  | 1.65471500  |
| H | -0.57557600 | 3.50693600  | 0.19777800  |
| H | -1.42717700 | 5.01389300  | 0.62633900  |
| O | -4.07328700 | -4.19231800 | -0.68233200 |
| H | -4.59134400 | -4.25324500 | -1.49795000 |
| C | -2.06225000 | -1.16332300 | 2.47726800  |
| H | -2.77731300 | -0.58790900 | 3.08143000  |
| H | -1.85618400 | -2.10226400 | 2.99398500  |
| H | -1.14920200 | -0.57224900 | 2.40572600  |
| H | -1.64226900 | -0.73690600 | -1.74744200 |

## TS5

|                                          |                             |
|------------------------------------------|-----------------------------|
| Zero-point correction=                   | 0.490671 (Hartree/Particle) |
| Thermal correction to Energy=            | 0.527666                    |
| Thermal correction to Enthalpy=          | 0.528610                    |
| Thermal correction to Gibbs Free Energy= | 0.423244                    |

|                                              |              |
|----------------------------------------------|--------------|
| Sum of electronic and zero-point Energies=   | -1845.535108 |
| Sum of electronic and thermal Energies=      | -1845.498113 |
| Sum of electronic and thermal Enthalpies=    | -1845.497169 |
| Sum of electronic and thermal Free Energies= | -1845.602535 |

|    |             |             |             |
|----|-------------|-------------|-------------|
| Rh | 0.37549700  | -0.07295700 | -0.21279200 |
| Rh | 2.74953200  | -0.22446900 | 0.31745600  |
| O  | 0.80064100  | 1.78167800  | -1.00048500 |
| O  | 3.03004400  | 1.57559800  | -0.62922100 |
| O  | 0.15403700  | -1.93627600 | 0.64475100  |
| O  | 2.34320100  | -2.02952800 | 1.23599900  |
| O  | 2.35325500  | 0.78627300  | 2.07455400  |
| O  | 0.13169600  | 0.87162200  | 1.62032400  |
| O  | 0.80600200  | -0.99826100 | -1.99870000 |
| O  | 3.00692100  | -1.19363300 | -1.47674400 |
| C  | 2.00310400  | 2.19252500  | -1.05654200 |
| C  | 2.00684600  | -1.34896900 | -2.24409700 |
| C  | 1.16155200  | 1.12378600  | 2.33434500  |
| C  | 1.16392500  | -2.49260100 | 1.19016400  |
| C  | 0.91389700  | 1.91437600  | 3.59728000  |
| H  | 0.07669700  | 1.48052100  | 4.15029300  |
| H  | 1.80838200  | 1.93623200  | 4.21926200  |
| H  | 0.63437700  | 2.93700900  | 3.32441100  |
| C  | 2.21049200  | 3.55827300  | -1.66497300 |
| H  | 1.97203800  | 4.31833500  | -0.91311800 |
| H  | 3.24798500  | 3.68499600  | -1.97540300 |
| H  | 1.52909200  | 3.69336400  | -2.50671100 |
| C  | 0.90815200  | -3.81431200 | 1.87659300  |
| H  | 0.54520400  | -3.61928400 | 2.89169300  |
| H  | 0.13854600  | -4.37344800 | 1.34157500  |
| H  | 1.82976200  | -4.39302200 | 1.94462500  |
| C  | 2.25931500  | -1.98240400 | -3.59094700 |
| H  | 3.19594000  | -2.54032400 | -3.57973200 |
| H  | 1.42481300  | -2.63081800 | -3.86448800 |
| H  | 2.32832200  | -1.18889300 | -4.34232600 |
| C  | -1.83740400 | -0.05981500 | -0.97517300 |
| C  | -2.04237900 | 1.35498900  | -1.37836300 |
| C  | -2.69838200 | 3.44365600  | -0.23321500 |
| O  | -1.68323400 | 1.89543700  | -2.41488300 |
| N  | -2.73664900 | 1.98737700  | -0.35275400 |
| C  | -2.95556400 | 1.11728200  | 0.79549600  |
| H  | -3.94404800 | 1.28563400  | 1.23643000  |
| H  | -2.18716900 | 1.26037800  | 1.56028900  |
| C  | -2.84538100 | -0.30597300 | 0.22084600  |

|   |             |             |             |
|---|-------------|-------------|-------------|
| C | -2.64903200 | -1.43861200 | 1.16893200  |
| C | -3.75238200 | -0.59058000 | -0.90317600 |
| C | -3.01107000 | -2.69062000 | 0.78990200  |
| C | -4.08488100 | -1.90647800 | -1.26831400 |
| H | -4.20869500 | 0.24633500  | -1.41559500 |
| C | -3.67472800 | -2.94239600 | -0.45405400 |
| H | -2.83864700 | -3.53984500 | 1.44195500  |
| H | -4.66002500 | -2.09454900 | -2.17038100 |
| H | -2.54949600 | 3.78811800  | -1.26068600 |
| C | -4.02719600 | 3.98828800  | 0.29283700  |
| H | -4.02273300 | 5.08213400  | 0.27123700  |
| H | -4.86297800 | 3.63427500  | -0.31808600 |
| H | -4.20532500 | 3.68274900  | 1.33031000  |
| C | -1.49897000 | 3.90340100  | 0.60856500  |
| H | -1.59415300 | 3.57475700  | 1.64952000  |
| H | -0.57743600 | 3.48493600  | 0.19825000  |
| H | -1.43047700 | 4.99637000  | 0.60750400  |
| O | -3.91734300 | -4.24217700 | -0.72183900 |
| H | -4.38361900 | -4.31944300 | -1.56618100 |
| C | -2.11235600 | -1.17394200 | 2.53988600  |
| H | -2.82649300 | -0.57148100 | 3.11692400  |
| H | -1.94573200 | -2.10983900 | 3.07694600  |
| H | -1.17959300 | -0.61093700 | 2.48735500  |
| H | -1.61140500 | -0.80679600 | -1.72247500 |

## CP7

|                                              |                             |
|----------------------------------------------|-----------------------------|
| Zero-point correction=                       | 0.492484 (Hartree/Particle) |
| Thermal correction to Energy=                | 0.529789                    |
| Thermal correction to Enthalpy=              | 0.530733                    |
| Thermal correction to Gibbs Free Energy=     | 0.423532                    |
| Sum of electronic and zero-point Energies=   | -1845.571759                |
| Sum of electronic and thermal Energies=      | -1845.534454                |
| Sum of electronic and thermal Enthalpies=    | -1845.533510                |
| Sum of electronic and thermal Free Energies= | -1845.640712                |

|    |             |             |             |
|----|-------------|-------------|-------------|
| Rh | -0.93510600 | 0.31915300  | -0.46087500 |
| Rh | -2.76285100 | -0.82039600 | 0.62815300  |
| O  | -1.94845600 | 2.08652800  | -0.16383200 |
| O  | -3.68411100 | 1.00665000  | 0.82485800  |
| O  | -0.04778700 | -1.53224400 | -0.69782100 |
| O  | -1.73744600 | -2.59162600 | 0.38112000  |
| O  | -3.62220200 | -1.05096600 | -1.22256200 |
| O  | -1.91604900 | 0.04574700  | -2.24471900 |

|   |             |             |             |
|---|-------------|-------------|-------------|
| O | -0.06641700 | 0.54337400  | 1.40646700  |
| O | -1.78796100 | -0.52616000 | 2.42498200  |
| C | -3.09290600 | 2.04691500  | 0.39236600  |
| C | -0.67193700 | 0.07507200  | 2.42718400  |
| C | -3.03245500 | -0.56620800 | -2.24089400 |
| C | -0.62527300 | -2.56679500 | -0.23218500 |
| C | -3.73723400 | -0.70002900 | -3.56937400 |
| H | -3.00897300 | -0.75717200 | -4.37962300 |
| H | -4.38645900 | -1.57650700 | -3.56673800 |
| H | -4.35683300 | 0.18898100  | -3.72823000 |
| C | -3.83195200 | 3.35754000  | 0.52127000  |
| H | -4.43595600 | 3.50880500  | -0.37971100 |
| H | -4.50093300 | 3.33167800  | 1.38251000  |
| H | -3.12560700 | 4.18498200  | 0.60179400  |
| C | 0.07602700  | -3.88619200 | -0.45675900 |
| H | -0.13399800 | -4.22796400 | -1.47567300 |
| H | 1.15614500  | -3.75644500 | -0.36354500 |
| H | -0.29126700 | -4.63658100 | 0.24439200  |
| C | 0.03096800  | 0.24104500  | 3.75471000  |
| H | 0.37648300  | 1.27187800  | 3.86486600  |
| H | -0.63220200 | -0.02703300 | 4.57682400  |
| H | 0.91307200  | -0.40765400 | 3.77623400  |
| C | 2.50565000  | -0.13339100 | -0.76835000 |
| C | 1.91262500  | 1.21221300  | -0.91812800 |
| C | 2.39307900  | 3.52338700  | -0.21026600 |
| O | 0.76645700  | 1.49020000  | -1.32541900 |
| N | 2.80264700  | 2.14395700  | -0.49921800 |
| C | 4.10591500  | 1.58884100  | -0.12683300 |
| H | 4.38336700  | 1.89954300  | 0.88699400  |
| H | 4.88050100  | 1.94932100  | -0.81239200 |
| C | 3.91409200  | 0.07508400  | -0.22275100 |
| C | 5.02055200  | -0.83265600 | -0.59543800 |
| C | 2.80788800  | -0.48778500 | 0.68038600  |
| C | 4.93264100  | -2.14723500 | -0.29015800 |
| C | 2.89982400  | -1.90236500 | 1.05759100  |
| H | 2.36160000  | 0.18138400  | 1.40963000  |
| C | 3.86131200  | -2.69007300 | 0.52528200  |
| H | 5.71032400  | -2.83997100 | -0.59578200 |
| H | 2.17068200  | -2.29506100 | 1.76125600  |
| H | 1.51473500  | 3.68823200  | -0.83921800 |
| C | 1.96764700  | 3.64795100  | 1.25825900  |
| H | 1.58916700  | 4.65493700  | 1.45976800  |
| H | 1.17818600  | 2.92492500  | 1.48073600  |
| H | 2.81331000  | 3.46671400  | 1.93178500  |

|   |            |             |             |
|---|------------|-------------|-------------|
| C | 3.48957500 | 4.51278300  | -0.60309100 |
| H | 4.38554700 | 4.39064800  | 0.01537700  |
| H | 3.77348800 | 4.39016000  | -1.65244000 |
| H | 3.13094400 | 5.53627200  | -0.46349000 |
| O | 3.97442900 | -4.03559400 | 0.75221300  |
| H | 3.25525900 | -4.31423200 | 1.33480500  |
| C | 6.21093900 | -0.26770700 | -1.31853100 |
| H | 6.76012300 | 0.44854400  | -0.69469400 |
| H | 6.90586400 | -1.06086300 | -1.60296000 |
| H | 5.91043800 | 0.26802500  | -2.22797000 |
| H | 2.22700900 | -0.92694300 | -1.44553600 |

## TS6

|                                              |                             |
|----------------------------------------------|-----------------------------|
| Zero-point correction=                       | 0.491080 (Hartree/Particle) |
| Thermal correction to Energy=                | 0.528203                    |
| Thermal correction to Enthalpy=              | 0.529148                    |
| Thermal correction to Gibbs Free Energy=     | 0.422596                    |
| Sum of electronic and zero-point Energies=   | -1845.559811                |
| Sum of electronic and thermal Energies=      | -1845.522688                |
| Sum of electronic and thermal Enthalpies=    | -1845.521743                |
| Sum of electronic and thermal Free Energies= | -1845.628295                |

|    |             |             |             |
|----|-------------|-------------|-------------|
| Rh | -0.90651900 | 0.42828800  | -0.29350100 |
| Rh | -2.88657600 | -0.80001500 | 0.33429600  |
| O  | -1.86027200 | 2.14853600  | 0.31162900  |
| O  | -3.73687700 | 0.99576600  | 0.86357600  |
| O  | -0.09371100 | -1.38256900 | -0.87569500 |
| O  | -1.92867700 | -2.53785300 | -0.21673800 |
| O  | -3.56187300 | -0.54758300 | -1.58934400 |
| O  | -1.71320000 | 0.63548000  | -2.17294300 |
| O  | -0.22100400 | 0.15755700  | 1.63895700  |
| O  | -2.08859400 | -0.98869800 | 2.22748700  |
| C  | -3.05180200 | 2.06167800  | 0.75173600  |
| C  | -0.95096200 | -0.48004600 | 2.46642300  |
| C  | -2.85065500 | 0.11488200  | -2.41046100 |
| C  | -0.75860600 | -2.45543500 | -0.70313100 |
| C  | -3.42245000 | 0.33369200  | -3.79066500 |
| H  | -2.61920900 | 0.42914700  | -4.52259900 |
| H  | -4.09485900 | -0.48347800 | -4.05511500 |
| H  | -3.99692100 | 1.26614300  | -3.78777700 |
| C  | -3.70025600 | 3.34455400  | 1.21524800  |
| H  | -4.78370600 | 3.28052600  | 1.10598900  |
| H  | -3.46968400 | 3.49211700  | 2.27577100  |



|   |             |             |             |
|---|-------------|-------------|-------------|
| H | -3.30290000 | 4.19292700  | 0.65632700  |
| C | -0.08662300 | -3.73750400 | -1.13441800 |
| H | 0.00742200  | -3.74066400 | -2.22484900 |
| H | 0.92399400  | -3.78856000 | -0.72209800 |
| H | -0.67365100 | -4.60087100 | -0.82102500 |
| C | -0.41345400 | -0.61651800 | 3.87231600  |
| H | -0.93480800 | -1.41207600 | 4.40492500  |
| H | 0.66109700  | -0.81138000 | 3.84696400  |
| H | -0.56881400 | 0.32740000  | 4.40506400  |
| C | 2.52449000  | -0.15183000 | -0.43412200 |
| C | 2.05612900  | 1.26838900  | -0.53745200 |
| C | 2.93869000  | 3.54410700  | -0.17144200 |
| O | 0.89784100  | 1.66413200  | -0.75544200 |
| N | 3.10674600  | 2.09511700  | -0.33110500 |
| C | 4.37284000  | 1.39495500  | -0.10043000 |
| H | 4.79176200  | 1.66036800  | 0.87848700  |
| H | 5.11331100  | 1.67857000  | -0.85944000 |
| C | 3.99726200  | -0.07026900 | -0.21775600 |
| C | 4.88167700  | -1.12172400 | -0.55025700 |
| C | 2.62590800  | -0.64571300 | 0.95986600  |
| C | 4.48631900  | -2.44540600 | -0.43160200 |
| C | 2.72505000  | -2.02375500 | 1.22883300  |
| H | 2.35396500  | 0.04195600  | 1.75281300  |
| C | 3.43318700  | -2.88351800 | 0.40433800  |
| H | 5.12829300  | -3.22774900 | -0.82574800 |
| H | 2.31521000  | -2.40167800 | 2.16319300  |
| H | 1.98670400  | 3.76770600  | -0.65952200 |
| C | 2.82197800  | 3.90570600  | 1.31384600  |
| H | 2.64324500  | 4.97890000  | 1.42990000  |
| H | 1.98735800  | 3.36690100  | 1.77075000  |
| H | 3.74050100  | 3.65807200  | 1.85732700  |
| C | 4.05922800  | 4.30556300  | -0.88010400 |
| H | 5.03048200  | 4.13339400  | -0.40379800 |
| H | 4.13102400  | 4.01205400  | -1.93139000 |
| H | 3.85816000  | 5.37951200  | -0.83825200 |
| O | 3.32134300  | -4.24940100 | 0.52146900  |
| H | 2.59700000  | -4.44702200 | 1.12890900  |
| C | 6.29245800  | -0.79080300 | -0.97738800 |
| H | 6.85544600  | -0.32914600 | -0.15633600 |
| H | 6.82983100  | -1.69448100 | -1.27286700 |
| H | 6.31937700  | -0.08846100 | -1.81954200 |
| H | 2.11017900  | -0.84720600 | -1.15801400 |

**3a+[Rh]**

|                                              |                             |
|----------------------------------------------|-----------------------------|
| Zero-point correction=                       | 0.492399 (Hartree/Particle) |
| Thermal correction to Energy=                | 0.530054                    |
| Thermal correction to Enthalpy=              | 0.530998                    |
| Thermal correction to Gibbs Free Energy=     | 0.423940                    |
| Sum of electronic and zero-point Energies=   | -1845.576028                |
| Sum of electronic and thermal Energies=      | -1845.538373                |
| Sum of electronic and thermal Enthalpies=    | -1845.537429                |
| Sum of electronic and thermal Free Energies= | -1845.644487                |

|    |             |             |             |
|----|-------------|-------------|-------------|
| Rh | 0.87881600  | 0.42953100  | 0.00365600  |
| Rh | 2.98047400  | -0.75154000 | 0.12942000  |
| O  | 1.90225400  | 2.03156100  | -0.78205100 |
| O  | 3.88344600  | 0.93375400  | -0.62481400 |
| O  | 0.00250100  | -1.25313200 | 0.82777600  |
| O  | 1.96570700  | -2.38451000 | 0.87072000  |
| O  | 3.19422600  | -0.00957700 | 2.03536200  |
| O  | 1.23267300  | 1.12699700  | 1.90610300  |
| O  | 0.65909300  | -0.33882700 | -1.90501300 |
| O  | 2.64566000  | -1.42905700 | -1.78688600 |
| C  | 3.16393900  | 1.93913000  | -0.92453700 |
| C  | 1.57894800  | -1.08147100 | -2.38092600 |
| C  | 2.29985700  | 0.76568800  | 2.50024900  |
| C  | 0.71640300  | -2.28018600 | 1.06966400  |
| C  | 2.53849000  | 1.34037600  | 3.87614000  |
| H  | 1.58843300  | 1.53706100  | 4.37500300  |
| H  | 3.15494600  | 0.66194400  | 4.46734600  |
| H  | 3.07402500  | 2.28990300  | 3.77085700  |
| C  | 3.86663800  | 3.12648600  | -1.53861800 |
| H  | 4.90505900  | 3.16412100  | -1.20695900 |
| H  | 3.85583500  | 3.01621700  | -2.62823900 |
| H  | 3.34327400  | 4.04906300  | -1.28341200 |
| C  | 0.00185300  | -3.46811600 | 1.66970500  |
| H  | -0.20814400 | -3.25863500 | 2.72366400  |
| H  | -0.95769800 | -3.62749200 | 1.17311600  |
| H  | 0.62482500  | -4.36043700 | 1.60447600  |
| C  | 1.38793100  | -1.56706300 | -3.79879600 |
| H  | 2.01231200  | -2.44010800 | -3.99019700 |
| H  | 0.33601700  | -1.79718900 | -3.98020700 |
| H  | 1.67934600  | -0.76748400 | -4.48786100 |
| C  | -2.64930900 | -0.17318800 | 0.06465600  |
| C  | -2.16158700 | 1.25760800  | -0.02391900 |
| C  | -3.06265600 | 3.55247600  | -0.13177800 |
| O  | -0.98354600 | 1.64197100  | -0.13054600 |

|   |             |             |             |
|---|-------------|-------------|-------------|
| N | -3.21621600 | 2.10008000  | 0.00672900  |
| C | -4.51563800 | 1.42641000  | 0.04927000  |
| H | -5.09487300 | 1.65279900  | -0.85708500 |
| H | -5.10296900 | 1.78152300  | 0.90536600  |
| C | -4.14573400 | -0.03383400 | 0.17778900  |
| C | -4.96699100 | -1.07570900 | 0.42877300  |
| C | -2.29616700 | -0.98513000 | -1.15286300 |
| C | -4.48475800 | -2.44397100 | 0.47709300  |
| C | -2.64970500 | -2.27945300 | -1.23074500 |
| H | -1.71909400 | -0.52231700 | -1.94602300 |
| C | -3.45815700 | -2.97466700 | -0.24532300 |
| H | -5.06410300 | -3.15390300 | 1.06331400  |
| H | -2.32637300 | -2.86693700 | -2.09002000 |
| H | -1.99946300 | 3.73337200  | 0.04485100  |
| C | -3.40611200 | 3.99875800  | -1.55730000 |
| H | -3.22682900 | 5.07218200  | -1.66941800 |
| H | -2.78488600 | 3.46941700  | -2.28485100 |
| H | -4.45895700 | 3.80983000  | -1.79331800 |
| C | -3.88042000 | 4.29253900  | 0.92857900  |
| H | -4.95720900 | 4.17228600  | 0.76820000  |
| H | -3.63603600 | 3.93371600  | 1.93251300  |
| H | -3.65880400 | 5.36247400  | 0.88403600  |
| O | -3.24397900 | -4.32785000 | -0.11485600 |
| H | -2.45057600 | -4.56522000 | -0.61122200 |
| C | -6.44710300 | -0.88408800 | 0.67041800  |
| H | -7.03489900 | -1.23035400 | -0.18793500 |
| H | -6.77245000 | -1.47221500 | 1.53571300  |
| H | -6.70984700 | 0.16022600  | 0.85684900  |
| H | -2.20802800 | -0.66024600 | 0.94435700  |

## TS7

|                                              |             |             |                             |
|----------------------------------------------|-------------|-------------|-----------------------------|
| Zero-point correction=                       |             |             | 0.487099 (Hartree/Particle) |
| Thermal correction to Energy=                |             |             | 0.523720                    |
| Thermal correction to Enthalpy=              |             |             | 0.524664                    |
| Thermal correction to Gibbs Free Energy=     |             |             | 0.420640                    |
| Sum of electronic and zero-point Energies=   |             |             | -1845.518626                |
| Sum of electronic and thermal Energies=      |             |             | -1845.482005                |
| Sum of electronic and thermal Enthalpies=    |             |             | -1845.481061                |
| Sum of electronic and thermal Free Energies= |             |             | -1845.585085                |
| Rh                                           | 0.37069100  | 0.00658900  | -0.09558400                 |
| Rh                                           | 2.70017400  | -0.83838800 | 0.11017000                  |
| O                                            | -0.21556000 | -1.92528800 | -0.05106800                 |

|   |             |             |             |
|---|-------------|-------------|-------------|
| O | 1.90939800  | -2.72458100 | -0.01464300 |
| O | 1.35124400  | 2.01080800  | -0.06288500 |
| O | 3.39970100  | 1.11568100  | 0.20917300  |
| O | 2.79305400  | -0.77292700 | -1.95000200 |
| O | 0.66270500  | 0.00224000  | -2.12827000 |
| O | 0.29785400  | -0.05443400 | 1.98619500  |
| O | 2.42047000  | -0.85315600 | 2.15926100  |
| C | 0.65138600  | -2.86262600 | -0.05622500 |
| C | 1.30651300  | -0.48905800 | 2.63877600  |
| C | 1.77485200  | -0.39718700 | -2.60873400 |
| C | 2.65166900  | 2.09915600  | 0.09137200  |
| C | 1.86325200  | -0.44081600 | -4.11557100 |
| H | 2.90088400  | -0.53562400 | -4.43604900 |
| H | 1.29412400  | -1.30553300 | -4.47149500 |
| H | 1.40511500  | 0.45337500  | -4.54348600 |
| C | 0.08655800  | -4.26112400 | -0.10544600 |
| H | -0.66675400 | -4.31664600 | -0.89464800 |
| H | 0.88167700  | -4.98647900 | -0.27707900 |
| H | -0.40878600 | -4.48263700 | 0.84522000  |
| C | 3.23369000  | 3.48850300  | 0.10118400  |
| H | 2.64634000  | 4.14860300  | 0.74427500  |
| H | 4.26958300  | 3.44995200  | 0.43437400  |
| H | 3.19377700  | 3.90050700  | -0.91267400 |
| C | 1.13159700  | -0.59638300 | 4.13742900  |
| H | 0.56076700  | -1.50379500 | 4.36112900  |
| H | 2.10132400  | -0.66089300 | 4.63128900  |
| H | 0.56411700  | 0.25677700  | 4.51587300  |
| C | -1.68999900 | 0.54811800  | -0.56832300 |
| C | -2.53511900 | -0.60926500 | -0.98045900 |
| C | -4.42137300 | -1.94074100 | -0.10529300 |
| O | -2.33615500 | -1.36178000 | -1.92792400 |
| N | -3.63357400 | -0.71266300 | -0.14210700 |
| C | -3.64913300 | 0.26554800  | 0.92321600  |
| H | -3.35199000 | -0.17510400 | 1.88502700  |
| H | -4.64968800 | 0.69244500  | 1.05804800  |
| C | -2.61357000 | 1.33574200  | 0.51318900  |
| C | -3.09059000 | 2.47362900  | -0.35084200 |
| C | -1.77781800 | 1.79533600  | 1.64918300  |
| C | -2.27594000 | 3.56230400  | -0.49484600 |
| C | -0.99526800 | 2.87712400  | 1.50515800  |
| H | -1.67703400 | 1.14443200  | 2.50792500  |
| C | -1.04027000 | 3.56059100  | 0.22809400  |
| H | -2.41657900 | 4.28169500  | -1.29475500 |
| H | -0.22138600 | 3.14515300  | 2.21511600  |

|   |             |             |             |
|---|-------------|-------------|-------------|
| H | -4.25892800 | -2.38629000 | -1.09102900 |
| C | -3.87858100 | -2.90722200 | 0.95712800  |
| H | -4.40202700 | -3.86766300 | 0.90943200  |
| H | -2.81178600 | -3.07803200 | 0.79023600  |
| H | -4.01169300 | -2.50650100 | 1.96861300  |
| C | -5.91103700 | -1.64432400 | 0.07505900  |
| H | -6.12253400 | -1.21489600 | 1.06101600  |
| H | -6.26418300 | -0.94432000 | -0.68821500 |
| H | -6.49242900 | -2.56711900 | -0.01030200 |
| O | 0.04640600  | 4.02600300  | -0.27862200 |
| H | 0.79299600  | 3.08538400  | -0.14475800 |
| C | -4.30271700 | 2.28362600  | -1.20934800 |
| H | -5.19992000 | 2.20020600  | -0.58379200 |
| H | -4.43659500 | 3.12190200  | -1.89567300 |
| H | -4.23716100 | 1.35603500  | -1.78537100 |
| H | -1.47665100 | 1.16857200  | -1.43779200 |

## CP8

|                                              |                             |
|----------------------------------------------|-----------------------------|
| Zero-point correction=                       | 0.491899 (Hartree/Particle) |
| Thermal correction to Energy=                | 0.529042                    |
| Thermal correction to Enthalpy=              | 0.529986                    |
| Thermal correction to Gibbs Free Energy=     | 0.424432                    |
| Sum of electronic and zero-point Energies=   | -1845.528921                |
| Sum of electronic and thermal Energies=      | -1845.491778                |
| Sum of electronic and thermal Enthalpies=    | -1845.490834                |
| Sum of electronic and thermal Free Energies= | -1845.596389                |

|    |             |             |             |
|----|-------------|-------------|-------------|
| Rh | -0.42419500 | -0.03178100 | 0.21319500  |
| Rh | -2.87288600 | 0.00041200  | -0.26372200 |
| O  | -0.56884100 | -2.03366600 | 0.39867500  |
| O  | -2.81975300 | -2.01051000 | 0.06468900  |
| O  | -0.53984200 | 2.11161700  | -0.04902600 |
| O  | -2.70824000 | 2.09932300  | -0.58435200 |
| O  | -3.15025500 | 0.30437400  | 1.75697700  |
| O  | -0.91591100 | 0.26319200  | 2.18585000  |
| O  | -0.14309700 | -0.32863200 | -1.83098600 |
| O  | -2.37835800 | -0.33129700 | -2.25140300 |
| C  | -1.71621800 | -2.58687500 | 0.31322200  |
| C  | -1.16573000 | -0.45622000 | -2.59146500 |
| C  | -2.14268000 | 0.34306800  | 2.52973900  |
| C  | -1.66051300 | 2.72419200  | -0.50155600 |
| C  | -2.40676600 | 0.47456200  | 4.01022200  |
| H  | -2.31382500 | -0.51596700 | 4.46740900  |

|   |             |             |             |
|---|-------------|-------------|-------------|
| H | -1.65879500 | 1.12268300  | 4.47070400  |
| H | -3.41346200 | 0.85393700  | 4.18684000  |
| C | -1.75105300 | -4.07796200 | 0.53832500  |
| H | -2.35512000 | -4.28697800 | 1.42586500  |
| H | -2.23393900 | -4.56537500 | -0.31261500 |
| H | -0.74338000 | -4.46601100 | 0.68242700  |
| C | -1.51956300 | 4.17295000  | -0.85019300 |
| H | -0.78147600 | 4.29650800  | -1.64976000 |
| H | -2.48280300 | 4.56126500  | -1.17649500 |
| H | -1.16103200 | 4.73423100  | 0.01824700  |
| C | -0.87935100 | -0.81259800 | -4.03165700 |
| H | -0.69591000 | -1.89054300 | -4.09274400 |
| H | -1.73284400 | -0.56642800 | -4.66359600 |
| H | 0.02081200  | -0.30214700 | -4.38038900 |
| C | 1.64057300  | 0.08589700  | 0.83005600  |
| C | 2.11259800  | -1.29772400 | 1.11782100  |
| C | 3.24210100  | -3.09917900 | -0.14791300 |
| O | 1.82689800  | -2.00256000 | 2.07956600  |
| N | 2.95143200  | -1.69027500 | 0.08771400  |
| C | 3.14455800  | -0.65685700 | -0.90800400 |
| H | 2.51841300  | -0.82106800 | -1.79407700 |
| H | 4.18932000  | -0.59818200 | -1.23311700 |
| C | 2.69499900  | 0.65249400  | -0.19012200 |
| C | 3.78878200  | 1.31934000  | 0.62825200  |
| C | 2.06459700  | 1.59142600  | -1.16979700 |
| C | 3.89982300  | 2.66653100  | 0.67595900  |
| C | 2.18857700  | 2.93255700  | -1.11385500 |
| H | 1.43384500  | 1.12367400  | -1.91870900 |
| C | 3.07509800  | 3.58134500  | -0.11836800 |
| H | 4.62941300  | 3.14067600  | 1.32635600  |
| H | 1.71981500  | 3.58834200  | -1.84576700 |
| H | 3.01628100  | -3.57556200 | 0.81085700  |
| C | 2.30467500  | -3.68137700 | -1.21594500 |
| H | 2.45207000  | -4.76229900 | -1.30995900 |
| H | 1.26458100  | -3.48642400 | -0.94185400 |
| H | 2.49322800  | -3.23364900 | -2.19851100 |
| C | 4.71892700  | -3.32005800 | -0.48222500 |
| H | 4.99053100  | -2.85672000 | -1.43758300 |
| H | 5.36108300  | -2.90170200 | 0.29846600  |
| H | 4.93288800  | -4.38993500 | -0.56525500 |
| O | 3.11704400  | 4.80554700  | -0.00330700 |
| H | 0.31997000  | 2.55574200  | -0.27118500 |
| C | 4.68184100  | 0.45793000  | 1.47844700  |
| H | 5.20059600  | -0.29424800 | 0.87600200  |

|   |            |             |            |
|---|------------|-------------|------------|
| H | 5.42710000 | 1.07044200  | 1.99045600 |
| H | 4.10786400 | -0.09196500 | 2.23116200 |
| H | 1.55460500 | 0.70148800  | 1.72745500 |

## TS8

|                                              |  |  |                             |
|----------------------------------------------|--|--|-----------------------------|
| Zero-point correction=                       |  |  | 0.486606 (Hartree/Particle) |
| Thermal correction to Energy=                |  |  | 0.523467                    |
| Thermal correction to Enthalpy=              |  |  | 0.524411                    |
| Thermal correction to Gibbs Free Energy=     |  |  | 0.419916                    |
| Sum of electronic and zero-point Energies=   |  |  | -1845.491083                |
| Sum of electronic and thermal Energies=      |  |  | -1845.454221                |
| Sum of electronic and thermal Enthalpies=    |  |  | -1845.453277                |
| Sum of electronic and thermal Free Energies= |  |  | -1845.557772                |

|    |             |             |             |
|----|-------------|-------------|-------------|
| Rh | -0.60558800 | 0.05237900  | -0.28394100 |
| Rh | -2.80860500 | -0.73010900 | 0.35498100  |
| O  | -1.25069500 | 1.93725300  | 0.13177300  |
| O  | -3.39672800 | 1.21664300  | 0.37029900  |
| O  | -0.09566700 | -1.91006500 | -0.77078300 |
| O  | -1.84307900 | -2.67349500 | 0.38383000  |
| O  | -3.23994700 | -0.82877600 | -1.64895200 |
| O  | -1.28379300 | 0.18243900  | -2.21146100 |
| O  | -0.10818400 | -0.14393800 | 1.72700900  |
| O  | -2.25103400 | -0.56334200 | 2.33408400  |
| C  | -2.50372100 | 2.12202900  | 0.28747000  |
| C  | -1.03406300 | -0.32131300 | 2.59161400  |
| C  | -2.42477400 | -0.31450100 | -2.48300800 |
| C  | -0.69071800 | -2.85195700 | -0.02289900 |
| C  | -2.86068900 | -0.25812600 | -3.92514000 |
| H  | -3.44620700 | 0.65512800  | -4.07484000 |
| H  | -1.99197500 | -0.22316400 | -4.58297200 |
| H  | -3.49756200 | -1.11245300 | -4.15968200 |
| C  | -2.96089700 | 3.55568600  | 0.35735800  |
| H  | -2.94729700 | 3.97424300  | -0.65404000 |
| H  | -3.97111200 | 3.61723000  | 0.76150400  |
| H  | -2.26425100 | 4.13726900  | 0.96465900  |
| C  | 0.07282200  | -4.11591300 | 0.19206600  |
| H  | 1.06531200  | -3.88038100 | 0.58494700  |
| H  | -0.47086500 | -4.77451900 | 0.86752100  |
| H  | 0.21856700  | -4.61047300 | -0.77404400 |
| C  | -0.62949000 | -0.21117900 | 4.04022500  |
| H  | -0.52151100 | 0.84870100  | 4.29327800  |
| H  | -1.38771200 | -0.65535500 | 4.68488400  |

|   |            |             |             |
|---|------------|-------------|-------------|
| H | 0.33950000 | -0.68965800 | 4.19857700  |
| C | 1.70344600 | 0.04827600  | -0.95883600 |
| C | 1.63269300 | 1.54476000  | -1.12527600 |
| C | 2.16731500 | 3.54448200  | 0.24175400  |
| O | 1.13883000 | 2.17502600  | -2.05409400 |
| N | 2.28030600 | 2.11999500  | -0.05027200 |
| C | 2.82326700 | 1.15254600  | 0.87917600  |
| H | 2.17274700 | 1.01784400  | 1.75094200  |
| H | 3.81866300 | 1.44354500  | 1.23199200  |
| C | 2.88046000 | -0.17483500 | 0.05683600  |
| C | 4.17505200 | -0.31166600 | -0.73144400 |
| C | 2.62653900 | -1.34446700 | 0.96473000  |
| C | 4.87910000 | -1.46317500 | -0.72350500 |
| C | 3.35840700 | -2.46794600 | 0.97663200  |
| H | 1.77290000 | -1.22937800 | 1.62522200  |
| C | 4.52563000 | -2.63579200 | 0.08788400  |
| H | 5.77647000 | -1.56858800 | -1.32710800 |
| H | 3.13829700 | -3.29604800 | 1.64561700  |
| H | 1.63236400 | 3.94727400  | -0.62304300 |
| C | 1.32629400 | 3.78421000  | 1.50224700  |
| H | 1.16389400 | 4.85667900  | 1.65127600  |
| H | 0.35793800 | 3.28825900  | 1.40210300  |
| H | 1.82921800 | 3.39955600  | 2.39718600  |
| C | 3.54512100 | 4.20901700  | 0.32699900  |
| H | 4.13587800 | 3.80634500  | 1.15770000  |
| H | 4.10543400 | 4.05906600  | -0.60001000 |
| H | 3.43869900 | 5.28563700  | 0.49241600  |
| O | 5.16411300 | -3.68636800 | 0.04829000  |
| H | 0.86327700 | -1.37557600 | -0.73117500 |
| C | 4.63991100 | 0.84889900  | -1.57010400 |
| H | 4.82833700 | 1.73252400  | -0.95234500 |
| H | 5.56276700 | 0.59197300  | -2.09473700 |
| H | 3.89091700 | 1.14470600  | -2.31127200 |
| H | 1.88311800 | -0.40972400 | -1.93809800 |

**(S) -TRIPAg**

|                                            |                             |
|--------------------------------------------|-----------------------------|
| Zero-point correction=                     | 0.943436 (Hartree/Particle) |
| Thermal correction to Energy=              | 0.999109                    |
| Thermal correction to Enthalpy=            | 1.000053                    |
| Thermal correction to Gibbs Free Energy=   | 0.851110                    |
| Sum of electronic and zero-point Energies= | -2727.908289                |
| Sum of electronic and thermal Energies=    | -2727.852616                |
| Sum of electronic and thermal Enthalpies=  | -2727.851672                |



Sum of electronic and thermal Free Energies= -2728.000614

|   |             |             |             |
|---|-------------|-------------|-------------|
| C | -0.41318000 | 2.53201200  | -0.11458700 |
| C | -0.91955800 | 3.75946200  | -0.65987400 |
| C | -3.18579300 | 2.76783400  | -0.68555200 |
| C | -2.68862600 | 1.55351000  | -0.27087400 |
| C | 0.99410000  | 2.33521700  | 0.33320500  |
| C | 1.58748200  | 3.22569700  | 1.29653500  |
| C | 2.95350200  | 3.03255200  | 1.68113800  |
| C | 3.66719900  | 1.91774800  | 1.17610900  |
| C | 3.07171800  | 0.99427000  | 0.34813000  |
| H | -4.24547400 | 2.87952300  | -0.89252500 |
| H | 4.69926700  | 1.77083200  | 1.47942300  |
| C | -3.46359700 | 0.27875600  | -0.17140800 |
| C | -3.91819200 | -0.37032500 | -1.34452500 |
| C | -3.55402300 | -0.37931300 | 1.07639000  |
| C | -4.42805100 | -1.67262200 | -1.24902900 |
| C | -4.01020700 | -1.71873100 | 1.12112300  |
| C | -4.46290300 | -2.38009200 | -0.04828100 |
| H | -4.77150900 | -2.16945400 | -2.14986700 |
| H | -4.16840500 | -2.18618300 | 2.08919400  |
| C | 3.78250500  | -0.24591000 | -0.08575500 |
| C | 3.80146600  | -1.36662200 | 0.77333700  |
| C | 4.40967200  | -0.29953000 | -1.34272900 |
| C | 4.48750600  | -2.51095300 | 0.36411100  |
| C | 5.07724300  | -1.47188200 | -1.71251600 |
| C | 5.13160000  | -2.58408700 | -0.87457500 |
| H | 4.50889700  | -3.37398200 | 1.02159100  |
| H | 5.56176600  | -1.52341500 | -2.68423500 |
| C | -2.32700400 | 3.87795200  | -0.91043700 |
| C | -0.60644300 | 6.01980800  | -1.50596800 |
| C | -1.99945000 | 6.15215000  | -1.71106900 |
| C | -2.83725500 | 5.09977500  | -1.42294800 |
| C | -0.08059200 | 4.85496300  | -0.99376600 |
| H | 0.05493900  | 6.84252900  | -1.75984900 |
| H | -2.40184600 | 7.07837800  | -2.10948900 |
| H | -3.90648100 | 5.18058700  | -1.59917200 |
| H | 0.98790800  | 4.75921000  | -0.84432000 |
| C | 2.83670600  | 4.95910000  | 3.16189800  |
| C | 1.47179700  | 5.11920100  | 2.82947400  |
| C | 0.86443500  | 4.27661400  | 1.92558100  |
| C | 3.55587600  | 3.92944000  | 2.60232100  |
| H | 3.30585100  | 5.63541800  | 3.86983500  |
| H | 0.89336400  | 5.91066300  | 3.29655700  |

|    |             |             |             |
|----|-------------|-------------|-------------|
| H  | -0.18427200 | 4.40899700  | 1.69433500  |
| H  | 4.59738700  | 3.77178600  | 2.86890800  |
| C  | -1.29546200 | 1.47745500  | 0.01575600  |
| C  | 1.73588400  | 1.23183300  | -0.07753400 |
| O  | 1.23849100  | 0.32815600  | -1.00051100 |
| O  | -0.80465600 | 0.26854600  | 0.45471300  |
| P  | -0.04438500 | -0.65352100 | -0.71691900 |
| O  | 0.31874200  | -1.91115900 | 0.08368500  |
| O  | -0.85065500 | -0.76655100 | -1.96155700 |
| Ag | -1.75635200 | -2.46545900 | 0.63381800  |
| C  | 4.35526400  | 0.87121600  | -2.31339500 |
| C  | 3.53136900  | 0.51228700  | -3.56197800 |
| C  | 5.76143900  | 1.36604000  | -2.68879100 |
| H  | 3.84499800  | 1.69880600  | -1.81217500 |
| H  | 2.52198600  | 0.20258500  | -3.28088300 |
| H  | 3.45592600  | 1.37449900  | -4.23392700 |
| H  | 3.99858000  | -0.30692300 | -4.11943500 |
| H  | 6.33216200  | 1.64470600  | -1.79720400 |
| H  | 6.32899100  | 0.59482700  | -3.22026000 |
| H  | 5.69864400  | 2.24189000  | -3.34361500 |
| C  | 5.85528300  | -3.84811600 | -1.30553700 |
| C  | 4.88308300  | -5.03276200 | -1.43668300 |
| C  | 7.01648700  | -4.18842000 | -0.35676900 |
| H  | 6.28184100  | -3.65537600 | -2.29850000 |
| H  | 4.07083600  | -4.79778500 | -2.13082300 |
| H  | 5.40304000  | -5.92580000 | -1.80073000 |
| H  | 4.43236600  | -5.27812800 | -0.46912900 |
| H  | 7.72197800  | -3.35517900 | -0.28378900 |
| H  | 6.64896200  | -4.40309600 | 0.65242000  |
| H  | 7.56112400  | -5.07156800 | -0.70823800 |
| C  | 3.11091500  | -1.33440900 | 2.13214200  |
| C  | 4.11054900  | -0.95844400 | 3.24046400  |
| C  | 2.39309500  | -2.64877000 | 2.47445200  |
| H  | 2.34439800  | -0.55434200 | 2.09364900  |
| H  | 4.56709500  | 0.01727600  | 3.05429100  |
| H  | 3.61319000  | -0.92016700 | 4.21610100  |
| H  | 4.91556900  | -1.69962300 | 3.29809800  |
| H  | 1.71759900  | -2.93152600 | 1.66547500  |
| H  | 3.09989900  | -3.46615700 | 2.65466500  |
| H  | 1.80840800  | -2.52098900 | 3.39280700  |
| C  | -3.22358300 | 0.33107200  | 2.38114100  |
| C  | -2.28016000 | -0.46413900 | 3.29649700  |
| C  | -4.53265900 | 0.69341100  | 3.10949100  |
| H  | -2.72109400 | 1.26755900  | 2.13061500  |

|   |             |             |             |
|---|-------------|-------------|-------------|
| H | -1.34144600 | -0.68706900 | 2.78109900  |
| H | -2.04223500 | 0.12105700  | 4.19035800  |
| H | -2.73355200 | -1.40241700 | 3.63553000  |
| H | -5.18300200 | 1.29920600  | 2.47148100  |
| H | -5.08658300 | -0.20713600 | 3.39715600  |
| H | -4.31847900 | 1.26254900  | 4.01954600  |
| C | -3.86576500 | 0.29957500  | -2.70859500 |
| C | -5.23899000 | 0.91599800  | -3.03769100 |
| C | -3.40182200 | -0.64028700 | -3.83118800 |
| H | -3.13310700 | 1.10598900  | -2.64770000 |
| H | -5.56539900 | 1.62194900  | -2.26785700 |
| H | -5.19866600 | 1.44750700  | -3.99389200 |
| H | -6.00503200 | 0.13626200  | -3.11728800 |
| H | -2.44425900 | -1.09072500 | -3.56736300 |
| H | -4.13399600 | -1.42801800 | -4.04163900 |
| H | -3.27599600 | -0.06562100 | -4.75448900 |
| C | -5.03981400 | -3.78302300 | 0.01678700  |
| C | -6.41983500 | -3.76869600 | 0.70059800  |
| C | -4.09686800 | -4.78178600 | 0.70736900  |
| H | -5.18002600 | -4.11859400 | -1.01778000 |
| H | -7.10219700 | -3.08075900 | 0.19341500  |
| H | -6.86734200 | -4.76745600 | 0.68955300  |
| H | -6.33456500 | -3.44931900 | 1.74497900  |
| H | -3.12033800 | -4.81247500 | 0.20639200  |
| H | -3.93711700 | -4.52061900 | 1.75923600  |
| H | -4.51366600 | -5.79343600 | 0.68120700  |

## CPA

|                                              |                             |
|----------------------------------------------|-----------------------------|
| Zero-point correction=                       | 1.231684 (Hartree/Particle) |
| Thermal correction to Energy=                | 1.294409                    |
| Thermal correction to Enthalpy=              | 1.295274                    |
| Thermal correction to Gibbs Free Energy=     | 1.139764                    |
| Sum of electronic and zero-point Energies=   | -3547.504285                |
| Sum of electronic and thermal Energies=      | -3547.441560                |
| Sum of electronic and thermal Enthalpies=    | -3547.440695                |
| Sum of electronic and thermal Free Energies= | -3547.596205                |

|   |             |            |             |
|---|-------------|------------|-------------|
| C | -2.41904500 | 2.80579500 | 0.10181300  |
| C | -3.47131000 | 3.58468900 | -0.48723400 |
| C | -4.86645500 | 1.55772200 | -0.56270400 |
| C | -3.82122200 | 0.78109900 | -0.11107600 |
| C | -1.12727700 | 3.41067400 | 0.52385100  |
| C | -1.07108000 | 4.51630100 | 1.43776900  |

|   |             |             |             |
|---|-------------|-------------|-------------|
| C | 0.19883200  | 5.11204400  | 1.72592300  |
| C | 1.37314000  | 4.55820200  | 1.15959800  |
| C | 1.34142900  | 3.42692000  | 0.37094100  |
| H | -5.81407200 | 1.08691200  | -0.80470700 |
| H | 2.33123200  | 5.01496200  | 1.38806000  |
| C | -3.92917800 | -0.70792700 | -0.04663000 |
| C | -3.98048600 | -1.45302700 | -1.25226600 |
| C | -3.97076600 | -1.37853100 | 1.19354900  |
| C | -4.10022800 | -2.84814400 | -1.17892800 |
| C | -4.11562400 | -2.77159500 | 1.21245500  |
| C | -4.18525400 | -3.52755800 | 0.04357900  |
| H | -4.15334000 | -3.41527000 | -2.10228300 |
| H | -4.16540000 | -3.28480800 | 2.16925400  |
| C | 2.60880400  | 2.79672500  | -0.10385100 |
| C | 3.49788100  | 2.23809500  | 0.83733300  |
| C | 2.95429100  | 2.80303900  | -1.47318000 |
| C | 4.75048700  | 1.78689400  | 0.40505900  |
| C | 4.20226600  | 2.31110900  | -1.85709800 |
| C | 5.13855500  | 1.83492000  | -0.93269300 |
| H | 5.43146400  | 1.38660900  | 1.14631100  |
| H | 4.46159100  | 2.32403200  | -2.91162500 |
| C | -4.72225700 | 2.95100500  | -0.77917400 |
| C | -4.36093100 | 5.67108400  | -1.37361100 |
| C | -5.61122600 | 5.05474700  | -1.61510600 |
| C | -5.78185300 | 3.72078200  | -1.32836400 |
| C | -3.31958600 | 4.95656500  | -0.82588500 |
| H | -4.21907400 | 6.71692700  | -1.62862000 |
| H | -6.42596900 | 5.63217100  | -2.04114800 |
| H | -6.72768900 | 3.22661800  | -1.53339600 |
| H | -2.36520400 | 5.43778100  | -0.65357100 |
| C | -0.87187100 | 6.71503900  | 3.20962200  |
| C | -2.12101400 | 6.09806400  | 2.96364800  |
| C | -2.21825300 | 5.02826700  | 2.10274900  |
| C | 0.26230100  | 6.22494300  | 2.60616700  |
| H | -0.81051100 | 7.56248400  | 3.88557200  |
| H | -3.01117300 | 6.46792100  | 3.46357000  |
| H | -3.17906700 | 4.55967500  | 1.93075500  |
| H | 1.23280900  | 6.67157400  | 2.80459700  |
| C | -2.61151000 | 1.44012800  | 0.24107000  |
| C | 0.06818800  | 2.87848500  | 0.06174600  |
| O | 0.03815500  | 1.78430200  | -0.78693900 |
| O | -1.60003500 | 0.67145200  | 0.78325400  |
| P | -0.29271600 | 0.30284700  | -0.16321000 |
| O | 0.75601400  | -0.24290600 | 0.74822700  |

|    |             |             |             |
|----|-------------|-------------|-------------|
| O  | -0.76042000 | -0.50226900 | -1.37660200 |
| Ag | -1.17181800 | -2.48608300 | -0.54610600 |
| C  | 2.03035100  | 3.36875900  | -2.54376400 |
| C  | 1.62275100  | 2.29053300  | -3.56159900 |
| C  | 2.66452400  | 4.58662300  | -3.23762700 |
| H  | 1.11711600  | 3.71901600  | -2.05812300 |
| H  | 1.13204100  | 1.45345000  | -3.06040300 |
| H  | 0.92598800  | 2.70543200  | -4.29824900 |
| H  | 2.49386700  | 1.90919200  | -4.10591600 |
| H  | 2.92492400  | 5.36136700  | -2.50947900 |
| H  | 3.57977100  | 4.31094100  | -3.77228500 |
| H  | 1.97006200  | 5.01966800  | -3.96582000 |
| C  | 6.52493100  | 1.41013500  | -1.40723300 |
| C  | 7.46138700  | 0.98459800  | -0.27078900 |
| C  | 7.19660700  | 2.53092000  | -2.22367800 |
| H  | 6.39957900  | 0.54294700  | -2.06897100 |
| H  | 7.03890400  | 0.17200400  | 0.32485100  |
| H  | 8.42190100  | 0.65438100  | -0.68149500 |
| H  | 7.66539800  | 1.82177600  | 0.40598400  |
| H  | 6.59742000  | 2.82567100  | -3.08844300 |
| H  | 7.34257800  | 3.42103100  | -1.60187200 |
| H  | 8.17650900  | 2.20639300  | -2.59048500 |
| C  | 3.14541300  | 2.08449200  | 2.31267100  |
| C  | 4.01702100  | 2.98877600  | 3.19954500  |
| C  | 3.23555000  | 0.61330200  | 2.75336100  |
| H  | 2.10530300  | 2.38950500  | 2.44610200  |
| H  | 3.91400200  | 4.04203700  | 2.92013700  |
| H  | 3.73318900  | 2.88715200  | 4.25278100  |
| H  | 5.07695400  | 2.72578500  | 3.11116200  |
| H  | 2.57020900  | 0.00824000  | 2.13627900  |
| H  | 4.25515000  | 0.22388700  | 2.66119700  |
| H  | 2.93283800  | 0.51543700  | 3.80254200  |
| C  | -3.86112300 | -0.63774300 | 2.51795600  |
| C  | -2.61269100 | -1.08430600 | 3.29909900  |
| C  | -5.13992100 | -0.79964200 | 3.35673900  |
| H  | -3.74677900 | 0.42693600  | 2.30316100  |
| H  | -1.71136800 | -0.92731000 | 2.70205800  |
| H  | -2.51427700 | -0.50673700 | 4.22430800  |
| H  | -2.67816900 | -2.14312100 | 3.57682000  |
| H  | -6.01809900 | -0.44982300 | 2.80516700  |
| H  | -5.31107000 | -1.84665700 | 3.62905000  |
| H  | -5.06562600 | -0.22189700 | 4.28399500  |
| C  | -3.93941500 | -0.79124400 | -2.62574400 |
| C  | -5.34814800 | -0.76674400 | -3.24770200 |

|   |             |             |             |
|---|-------------|-------------|-------------|
| C | -2.94115600 | -1.45530500 | -3.58812000 |
| H | -3.60987300 | 0.24053100  | -2.48961800 |
| H | -6.06817300 | -0.26155400 | -2.59806900 |
| H | -5.33420200 | -0.24517200 | -4.21035100 |
| H | -5.71444500 | -1.78506700 | -3.41993700 |
| H | -1.92960700 | -1.41307000 | -3.17974500 |
| H | -3.20305300 | -2.49746600 | -3.80080200 |
| H | -2.93919500 | -0.92033900 | -4.54359400 |
| C | -4.37827700 | -5.03277700 | 0.09642600  |
| C | -3.34790300 | -5.79576600 | -0.75121000 |
| C | -5.81458300 | -5.40268000 | -0.31611700 |
| H | -4.24166800 | -5.33896500 | 1.14190200  |
| H | -2.32671000 | -5.56332500 | -0.44011400 |
| H | -3.49907000 | -6.87570300 | -0.65128300 |
| H | -3.44685000 | -5.54827400 | -1.81365900 |
| H | -6.55008400 | -4.88714900 | 0.30882300  |
| H | -6.00240200 | -5.11840300 | -1.35732000 |
| H | -5.98031300 | -6.48149900 | -0.22613300 |
| C | 3.53870500  | -2.40812200 | -0.73843600 |
| C | 4.71737400  | -2.19143800 | -1.44960100 |
| C | 5.95645300  | -2.14989000 | -0.80523600 |
| C | 6.02740300  | -2.30933800 | 0.57960200  |
| C | 4.85021800  | -2.52499100 | 1.29367900  |
| C | 3.60655100  | -2.58983100 | 0.66155000  |
| H | 4.68936100  | -2.04050400 | -2.52357900 |
| H | 6.98509400  | -2.27151300 | 1.09191800  |
| H | 4.90174600  | -2.64506500 | 2.37271000  |
| C | 2.22242800  | -2.41525600 | -1.46811100 |
| H | 2.36334400  | -2.24067900 | -2.53684000 |
| H | 1.69785800  | -3.37028900 | -1.35096400 |
| H | 1.57114900  | -1.63068700 | -1.07850200 |
| C | 2.37694700  | -2.87844600 | 1.48569000  |
| H | 1.56634200  | -2.18456400 | 1.24267800  |
| H | 2.61199000  | -2.76068600 | 2.54853000  |
| N | 1.88156500  | -4.26917800 | 1.27711800  |
| C | 0.59932900  | -4.47925600 | 1.10620900  |
| O | -0.05966200 | -5.54490600 | 0.86939600  |
| C | -0.61221800 | -3.74002600 | 1.00307400  |
| H | -1.17763600 | -3.74943400 | 1.93742100  |
| C | 2.84055800  | -5.40874800 | 1.28933300  |
| C | 2.96450900  | -6.02501600 | -0.10588500 |
| C | 2.47123600  | -6.42560200 | 2.37201000  |
| H | 3.79744200  | -4.95176500 | 1.54788200  |
| H | 3.29447000  | -5.27388800 | -0.82725900 |

|   |            |             |             |
|---|------------|-------------|-------------|
| H | 3.70301500 | -6.83194100 | -0.08808100 |
| H | 2.00852500 | -6.44060300 | -0.43440900 |
| H | 3.25234800 | -7.18868000 | 2.43490400  |
| H | 2.38820600 | -5.94064600 | 3.34934700  |
| H | 1.52414500 | -6.92078000 | 2.14716200  |
| O | 7.05795100 | -1.94606300 | -1.58571700 |
| H | 7.82615900 | -1.80170100 | -1.01843400 |

## TSB

|                                              |                             |
|----------------------------------------------|-----------------------------|
| Zero-point correction=                       | 1.228488 (Hartree/Particle) |
| Thermal correction to Energy=                | 1.291587                    |
| Thermal correction to Enthalpy=              | 1.292452                    |
| Thermal correction to Gibbs Free Energy=     | 1.134674                    |
| Sum of electronic and zero-point Energies=   | -3547.464377                |
| Sum of electronic and thermal Energies=      | -3547.401278                |
| Sum of electronic and thermal Enthalpies=    | -3547.400413                |
| Sum of electronic and thermal Free Energies= | -3547.558191                |

|   |             |             |             |
|---|-------------|-------------|-------------|
| C | -0.86867000 | 3.58075600  | -0.23474800 |
| C | -1.29879500 | 4.59064600  | -1.15916800 |
| C | -3.47078700 | 3.43841000  | -1.32951700 |
| C | -3.02324000 | 2.40893700  | -0.53005700 |
| C | 0.48479500  | 3.57961200  | 0.37979600  |
| C | 0.96568700  | 4.70317900  | 1.13123100  |
| C | 2.31734100  | 4.69913700  | 1.59979700  |
| C | 3.13885100  | 3.57873500  | 1.32666500  |
| C | 2.65947900  | 2.45654100  | 0.68394100  |
| H | -4.46398400 | 3.38348700  | -1.76507900 |
| H | 4.17971400  | 3.60197500  | 1.63485600  |
| C | -3.77691800 | 1.13378500  | -0.36392000 |
| C | -3.96171300 | 0.28879300  | -1.48681100 |
| C | -4.19569800 | 0.70553800  | 0.91493200  |
| C | -4.59783400 | -0.94595900 | -1.31280900 |
| C | -4.79390500 | -0.56146300 | 1.04862500  |
| C | -5.02080200 | -1.40039300 | -0.05797500 |
| H | -4.74706200 | -1.58276500 | -2.17806300 |
| H | -5.14628600 | -0.88188600 | 2.02505700  |
| C | 3.59433900  | 1.32956800  | 0.37737100  |
| C | 3.87705600  | 0.34838100  | 1.34545400  |
| C | 4.27618900  | 1.32464700  | -0.86056700 |
| C | 4.88017600  | -0.59144700 | 1.08050300  |
| C | 5.24444500  | 0.34511200  | -1.08936400 |
| C | 5.59039400  | -0.60162000 | -0.11825600 |

|    |             |             |             |
|----|-------------|-------------|-------------|
| H  | 5.11208900  | -1.32473100 | 1.84228300  |
| H  | 5.77116900  | 0.33553400  | -2.03976500 |
| C  | -2.63855100 | 4.53649800  | -1.66575200 |
| C  | -0.91077000 | 6.59040800  | -2.49248500 |
| C  | -2.24777400 | 6.56241600  | -2.95367200 |
| C  | -3.08844600 | 5.55098800  | -2.55181600 |
| C  | -0.44785100 | 5.63044400  | -1.62093000 |
| H  | -0.24092900 | 7.37379700  | -2.83382900 |
| H  | -2.60100200 | 7.32959800  | -3.63581100 |
| H  | -4.10980900 | 5.50112200  | -2.91945600 |
| H  | 0.57944700  | 5.65885800  | -1.28040300 |
| C  | 1.98812900  | 6.88104500  | 2.62100600  |
| C  | 0.63916800  | 6.86976200  | 2.19400200  |
| C  | 0.14113000  | 5.81099000  | 1.46908300  |
| C  | 2.80537800  | 5.81366300  | 2.33197000  |
| H  | 2.36930800  | 7.72560200  | 3.18685500  |
| H  | -0.01136200 | 7.70180600  | 2.44611400  |
| H  | -0.89601500 | 5.80941500  | 1.15750800  |
| H  | 3.83787300  | 5.79815800  | 2.67012500  |
| C  | -1.72859300 | 2.53592900  | 0.04658900  |
| C  | 1.30597800  | 2.46469100  | 0.24978500  |
| O  | 0.82244900  | 1.32166000  | -0.37858500 |
| O  | -1.31857500 | 1.57839600  | 0.95055900  |
| P  | -0.28474900 | 0.39226500  | 0.43325700  |
| O  | 0.24910900  | -0.27976200 | 1.65502500  |
| O  | -0.99775400 | -0.43010700 | -0.63452900 |
| Ag | -2.37191700 | -1.68661600 | 0.78158800  |
| C  | 3.98405700  | 2.37326400  | -1.92909400 |
| C  | 3.07771600  | 1.81225800  | -3.03815600 |
| C  | 5.26447200  | 2.98414400  | -2.51929200 |
| H  | 3.43612400  | 3.18811300  | -1.44816600 |
| H  | 2.13852700  | 1.43734700  | -2.62490200 |
| H  | 2.84516500  | 2.58990900  | -3.77417600 |
| H  | 3.57372100  | 0.98930800  | -3.56484500 |
| H  | 5.91755100  | 3.37187800  | -1.73140600 |
| H  | 5.83671300  | 2.25182700  | -3.09831900 |
| H  | 5.01377400  | 3.80907400  | -3.19457800 |
| C  | 6.75173100  | -1.55304600 | -0.37573200 |
| C  | 6.90344000  | -2.65226900 | 0.68039400  |
| C  | 8.06847500  | -0.76166500 | -0.50031200 |
| H  | 6.57026200  | -2.04725200 | -1.33787700 |
| H  | 5.97350300  | -3.20825600 | 0.82182400  |
| H  | 7.68226800  | -3.35740400 | 0.37407800  |
| H  | 7.19921200  | -2.23302500 | 1.64861900  |



|   |             |             |             |
|---|-------------|-------------|-------------|
| H | 8.01100400  | -0.00336100 | -1.28602400 |
| H | 8.29522700  | -0.24838700 | 0.44072700  |
| H | 8.90346600  | -1.43136000 | -0.73379600 |
| C | 3.16528100  | 0.32646200  | 2.69110600  |
| C | 3.99737600  | 1.05647300  | 3.76040300  |
| C | 2.82507200  | -1.09859400 | 3.15313800  |
| H | 2.21495100  | 0.85088200  | 2.57395400  |
| H | 4.16693100  | 2.10215600  | 3.48968200  |
| H | 3.48436500  | 1.03704100  | 4.72835700  |
| H | 4.97570300  | 0.57816400  | 3.88465600  |
| H | 2.31448100  | -1.64577900 | 2.35925700  |
| H | 3.71880700  | -1.65905200 | 3.44980900  |
| H | 2.15797700  | -1.05625700 | 4.01982900  |
| C | -4.07343800 | 1.58518600  | 2.15056600  |
| C | -3.34502200 | 0.87946300  | 3.30574900  |
| C | -5.46562600 | 2.08081600  | 2.58376500  |
| H | -3.48525000 | 2.46413200  | 1.88161600  |
| H | -2.34962800 | 0.55315100  | 2.99536000  |
| H | -3.22801200 | 1.56557600  | 4.15078900  |
| H | -3.90732000 | 0.01062300  | 3.66638000  |
| H | -5.96386800 | 2.61568900  | 1.76926000  |
| H | -6.10965900 | 1.24588100  | 2.88117300  |
| H | -5.38081100 | 2.76021900  | 3.43808300  |
| C | -3.45289000 | 0.63887200  | -2.87962100 |
| C | -4.62208600 | 0.99504400  | -3.81417400 |
| C | -2.58495700 | -0.48324500 | -3.47561700 |
| H | -2.81409100 | 1.51891800  | -2.79310500 |
| H | -5.21247100 | 1.82827500  | -3.42034100 |
| H | -4.24968100 | 1.27892200  | -4.80387900 |
| H | -5.29755800 | 0.14159900  | -3.94137600 |
| H | -1.76683700 | -0.72309700 | -2.79375700 |
| H | -3.16549600 | -1.39224700 | -3.66894100 |
| H | -2.16433900 | -0.15629300 | -4.43248200 |
| C | -5.76275400 | -2.71683000 | 0.10719100  |
| C | -4.98637800 | -3.91751500 | -0.45428200 |
| C | -7.16230700 | -2.61755600 | -0.52695200 |
| H | -5.89492800 | -2.87864400 | 1.18516400  |
| H | -4.03089800 | -4.06283600 | 0.05693200  |
| H | -5.56752600 | -4.83724500 | -0.33249200 |
| H | -4.78220600 | -3.79481500 | -1.52292300 |
| H | -7.72714600 | -1.77747400 | -0.11170300 |
| H | -7.08753900 | -2.46909700 | -1.60946300 |
| H | -7.73115000 | -3.53620400 | -0.35132400 |
| C | 2.78056800  | -2.75999900 | -1.42487900 |

|   |             |             |             |
|---|-------------|-------------|-------------|
| C | 4.04278500  | -3.18558900 | -1.84077900 |
| C | 4.65744600  | -4.29864800 | -1.26702200 |
| C | 4.01517000  | -5.00100200 | -0.24330800 |
| C | 2.75065800  | -4.58836500 | 0.16605300  |
| C | 2.11424700  | -3.48931400 | -0.41832400 |
| H | 4.56913900  | -2.64698500 | -2.62089900 |
| H | 4.49281700  | -5.86198900 | 0.21817800  |
| H | 2.23203400  | -5.14602600 | 0.94085300  |
| C | 2.17924700  | -1.52740700 | -2.04980400 |
| H | 2.79311800  | -1.18449400 | -2.88358800 |
| H | 1.16430700  | -1.69709700 | -2.42229100 |
| H | 2.12276200  | -0.70865200 | -1.32751300 |
| C | 0.70520400  | -3.14412400 | -0.00645100 |
| H | 0.29768000  | -2.33704900 | -0.61655800 |
| H | 0.68718700  | -2.75429700 | 1.01898900  |
| N | -0.17820000 | -4.32505400 | -0.08703700 |
| C | -1.20191200 | -4.48401300 | 0.79677800  |
| O | -2.01877800 | -5.41060800 | 0.77328400  |
| C | -1.39963100 | -3.30973400 | 1.70215800  |
| H | -0.68310300 | -3.13385100 | 2.50601300  |
| N | -2.68996400 | -4.18953700 | 2.99799700  |
| N | -3.66618600 | -4.38091600 | 3.48219100  |
| C | -0.24776700 | -5.00447200 | -1.40891000 |
| C | -1.51708500 | -4.59469500 | -2.16414200 |
| C | -0.07445700 | -6.51879000 | -1.28760800 |
| H | 0.61529700  | -4.61254100 | -1.95193300 |
| H | -1.59884400 | -3.50407200 | -2.22204200 |
| H | -1.48380200 | -4.98719600 | -3.18513200 |
| H | -2.40652700 | -4.98997500 | -1.67027000 |
| H | -0.03208600 | -6.96305700 | -2.28740200 |
| H | 0.86047200  | -6.75144000 | -0.77052200 |
| H | -0.90476700 | -6.96051300 | -0.73609200 |
| O | 5.89286000  | -4.64508900 | -1.73908300 |
| H | 6.23619900  | -5.37875300 | -1.21327900 |

## CPD

|                                            |                             |
|--------------------------------------------|-----------------------------|
| Zero-point correction=                     | 1.220720 (Hartree/Particle) |
| Thermal correction to Energy=              | 1.282174                    |
| Thermal correction to Enthalpy=            | 1.283039                    |
| Thermal correction to Gibbs Free Energy=   | 1.129071                    |
| Sum of electronic and zero-point Energies= | -3437.980207                |
| Sum of electronic and thermal Energies=    | -3437.918753                |
| Sum of electronic and thermal Enthalpies=  | -3437.917888                |

Sum of electronic and thermal Free Energies= -3438.071857

|   |             |             |             |
|---|-------------|-------------|-------------|
| C | -2.41904500 | 2.80579500  | 0.10181300  |
| C | -3.47131000 | 3.58468900  | -0.48723400 |
| C | -4.86645500 | 1.55772200  | -0.56270400 |
| C | -3.82122200 | 0.78109900  | -0.11107600 |
| C | -1.12727700 | 3.41067400  | 0.52385100  |
| C | -1.07108000 | 4.51630100  | 1.43776900  |
| C | 0.19883200  | 5.11204400  | 1.72592300  |
| C | 1.37314000  | 4.55820200  | 1.15959800  |
| C | 1.34142900  | 3.42692000  | 0.37094100  |
| H | -5.81407200 | 1.08691200  | -0.80470700 |
| H | 2.33123200  | 5.01496200  | 1.38806000  |
| C | -3.92917800 | -0.70792700 | -0.04663000 |
| C | -3.98048600 | -1.45302700 | -1.25226600 |
| C | -3.97076600 | -1.37853100 | 1.19354900  |
| C | -4.10022800 | -2.84814400 | -1.17892800 |
| C | -4.11562400 | -2.77159500 | 1.21245500  |
| C | -4.18525400 | -3.52755800 | 0.04357900  |
| H | -4.15334000 | -3.41527000 | -2.10228300 |
| H | -4.16540000 | -3.28480800 | 2.16925400  |
| C | 2.60880400  | 2.79672500  | -0.10385100 |
| C | 3.49788100  | 2.23809500  | 0.83733300  |
| C | 2.95429100  | 2.80303900  | -1.47318000 |
| C | 4.75048700  | 1.78689400  | 0.40505900  |
| C | 4.20226600  | 2.31110900  | -1.85709800 |
| C | 5.13855500  | 1.83492000  | -0.93269300 |
| H | 5.43146400  | 1.38660900  | 1.14631100  |
| H | 4.46159100  | 2.32403200  | -2.91162500 |
| C | -4.72225700 | 2.95100500  | -0.77917400 |
| C | -4.36093100 | 5.67108400  | -1.37361100 |
| C | -5.61122600 | 5.05474700  | -1.61510600 |
| C | -5.78185300 | 3.72078200  | -1.32836400 |
| C | -3.31958600 | 4.95656500  | -0.82588500 |
| H | -4.21907400 | 6.71692700  | -1.62862000 |
| H | -6.42596900 | 5.63217100  | -2.04114800 |
| H | -6.72768900 | 3.22661800  | -1.53339600 |
| H | -2.36520400 | 5.43778100  | -0.65357100 |
| C | -0.87187100 | 6.71503900  | 3.20962200  |
| C | -2.12101400 | 6.09806400  | 2.96364800  |
| C | -2.21825300 | 5.02826700  | 2.10274900  |
| C | 0.26230100  | 6.22494300  | 2.60616700  |
| H | -0.81051100 | 7.56248400  | 3.88557200  |
| H | -3.01117300 | 6.46792100  | 3.46357000  |

|    |             |             |             |
|----|-------------|-------------|-------------|
| H  | -3.17906700 | 4.55967500  | 1.93075500  |
| H  | 1.23280900  | 6.67157400  | 2.80459700  |
| C  | -2.61151000 | 1.44012800  | 0.24107000  |
| C  | 0.06818800  | 2.87848500  | 0.06174600  |
| O  | 0.03815500  | 1.78430200  | -0.78693900 |
| O  | -1.60003500 | 0.67145200  | 0.78325400  |
| P  | -0.29271600 | 0.30284700  | -0.16321000 |
| O  | 0.75601400  | -0.24290600 | 0.74822700  |
| O  | -0.76042000 | -0.50226900 | -1.37660200 |
| Ag | -1.17181800 | -2.48608300 | -0.54610600 |
| C  | 2.03035100  | 3.36875900  | -2.54376400 |
| C  | 1.62275100  | 2.29053300  | -3.56159900 |
| C  | 2.66452400  | 4.58662300  | -3.23762700 |
| H  | 1.11711600  | 3.71901600  | -2.05812300 |
| H  | 1.13204100  | 1.45345000  | -3.06040300 |
| H  | 0.92598800  | 2.70543200  | -4.29824900 |
| H  | 2.49386700  | 1.90919200  | -4.10591600 |
| H  | 2.92492400  | 5.36136700  | -2.50947900 |
| H  | 3.57977100  | 4.31094100  | -3.77228500 |
| H  | 1.97006200  | 5.01966800  | -3.96582000 |
| C  | 6.52493100  | 1.41013500  | -1.40723300 |
| C  | 7.46138700  | 0.98459800  | -0.27078900 |
| C  | 7.19660700  | 2.53092000  | -2.22367800 |
| H  | 6.39957900  | 0.54294700  | -2.06897100 |
| H  | 7.03890400  | 0.17200400  | 0.32485100  |
| H  | 8.42190100  | 0.65438100  | -0.68149500 |
| H  | 7.66539800  | 1.82177600  | 0.40598400  |
| H  | 6.59742000  | 2.82567100  | -3.08844300 |
| H  | 7.34257800  | 3.42103100  | -1.60187200 |
| H  | 8.17650900  | 2.20639300  | -2.59048500 |
| C  | 3.14541300  | 2.08449200  | 2.31267100  |
| C  | 4.01702100  | 2.98877600  | 3.19954500  |
| C  | 3.23555000  | 0.61330200  | 2.75336100  |
| H  | 2.10530300  | 2.38950500  | 2.44610200  |
| H  | 3.91400200  | 4.04203700  | 2.92013700  |
| H  | 3.73318900  | 2.88715200  | 4.25278100  |
| H  | 5.07695400  | 2.72578500  | 3.11116200  |
| H  | 2.57020900  | 0.00824000  | 2.13627900  |
| H  | 4.25515000  | 0.22388700  | 2.66119700  |
| H  | 2.93283800  | 0.51543700  | 3.80254200  |
| C  | -3.86112300 | -0.63774300 | 2.51795600  |
| C  | -2.61269100 | -1.08430600 | 3.29909900  |
| C  | -5.13992100 | -0.79964200 | 3.35673900  |
| H  | -3.74677900 | 0.42693600  | 2.30316100  |

|   |             |             |             |
|---|-------------|-------------|-------------|
| H | -1.71136800 | -0.92731000 | 2.70205800  |
| H | -2.51427700 | -0.50673700 | 4.22430800  |
| H | -2.67816900 | -2.14312100 | 3.57682000  |
| H | -6.01809900 | -0.44982300 | 2.80516700  |
| H | -5.31107000 | -1.84665700 | 3.62905000  |
| H | -5.06562600 | -0.22189700 | 4.28399500  |
| C | -3.93941500 | -0.79124400 | -2.62574400 |
| C | -5.34814800 | -0.76674400 | -3.24770200 |
| C | -2.94115600 | -1.45530500 | -3.58812000 |
| H | -3.60987300 | 0.24053100  | -2.48961800 |
| H | -6.06817300 | -0.26155400 | -2.59806900 |
| H | -5.33420200 | -0.24517200 | -4.21035100 |
| H | -5.71444500 | -1.78506700 | -3.41993700 |
| H | -1.92960700 | -1.41307000 | -3.17974500 |
| H | -3.20305300 | -2.49746600 | -3.80080200 |
| H | -2.93919500 | -0.92033900 | -4.54359400 |
| C | -4.37827700 | -5.03277700 | 0.09642600  |
| C | -3.34790300 | -5.79576600 | -0.75121000 |
| C | -5.81458300 | -5.40268000 | -0.31611700 |
| H | -4.24166800 | -5.33896500 | 1.14190200  |
| H | -2.32671000 | -5.56332500 | -0.44011400 |
| H | -3.49907000 | -6.87570300 | -0.65128300 |
| H | -3.44685000 | -5.54827400 | -1.81365900 |
| H | -6.55008400 | -4.88714900 | 0.30882300  |
| H | -6.00240200 | -5.11840300 | -1.35732000 |
| H | -5.98031300 | -6.48149900 | -0.22613300 |
| C | 3.53870500  | -2.40812200 | -0.73843600 |
| C | 4.71737400  | -2.19143800 | -1.44960100 |
| C | 5.95645300  | -2.14989000 | -0.80523600 |
| C | 6.02740300  | -2.30933800 | 0.57960200  |
| C | 4.85021800  | -2.52499100 | 1.29367900  |
| C | 3.60655100  | -2.58983100 | 0.66155000  |
| H | 4.68936100  | -2.04050400 | -2.52357900 |
| H | 6.98509400  | -2.27151300 | 1.09191800  |
| H | 4.90174600  | -2.64506500 | 2.37271000  |
| C | 2.22242800  | -2.41525600 | -1.46811100 |
| H | 2.36334400  | -2.24067900 | -2.53684000 |
| H | 1.69785800  | -3.37028900 | -1.35096400 |
| H | 1.57114900  | -1.63068700 | -1.07850200 |
| C | 2.37694700  | -2.87844600 | 1.48569000  |
| H | 1.56634200  | -2.18456400 | 1.24267800  |
| H | 2.61199000  | -2.76068600 | 2.54853000  |
| N | 1.88156500  | -4.26917800 | 1.27711800  |
| C | 0.59932900  | -4.47925600 | 1.10620900  |

|   |             |             |             |
|---|-------------|-------------|-------------|
| O | -0.05966200 | -5.54490600 | 0.86939600  |
| C | -0.61221800 | -3.74002600 | 1.00307400  |
| H | -1.17763600 | -3.74943400 | 1.93742100  |
| C | 2.84055800  | -5.40874800 | 1.28933300  |
| C | 2.96450900  | -6.02501600 | -0.10588500 |
| C | 2.47123600  | -6.42560200 | 2.37201000  |
| H | 3.79744200  | -4.95176500 | 1.54788200  |
| H | 3.29447000  | -5.27388800 | -0.82725900 |
| H | 3.70301500  | -6.83194100 | -0.08808100 |
| H | 2.00852500  | -6.44060300 | -0.43440900 |
| H | 3.25234800  | -7.18868000 | 2.43490400  |
| H | 2.38820600  | -5.94064600 | 3.34934700  |
| H | 1.52414500  | -6.92078000 | 2.14716200  |
| O | 7.05795100  | -1.94606300 | -1.58571700 |
| H | 7.82615900  | -1.80170100 | -1.01843400 |

### CPE

|                                              |                             |
|----------------------------------------------|-----------------------------|
| Zero-point correction=                       | 1.220669 (Hartree/Particle) |
| Thermal correction to Energy=                | 1.281758                    |
| Thermal correction to Enthalpy=              | 1.282623                    |
| Thermal correction to Gibbs Free Energy=     | 1.129455                    |
| Sum of electronic and zero-point Energies=   | -3437.996670                |
| Sum of electronic and thermal Energies=      | -3437.935581                |
| Sum of electronic and thermal Enthalpies=    | -3437.934716                |
| Sum of electronic and thermal Free Energies= | -3438.087885                |

|   |             |             |             |
|---|-------------|-------------|-------------|
| C | 1.98947500  | 2.64577100  | 0.75329400  |
| C | 2.55885400  | 3.96228500  | 0.78054400  |
| C | 0.41140700  | 4.85244600  | -0.02213600 |
| C | -0.11121400 | 3.58264800  | -0.14280700 |
| C | 2.74735600  | 1.45788600  | 1.22773600  |
| C | 3.27802000  | 1.37475400  | 2.55819200  |
| C | 4.07605200  | 0.23959400  | 2.91255400  |
| C | 4.28968900  | -0.78943900 | 1.96042600  |
| C | 3.70196600  | -0.76461300 | 0.71394900  |
| H | -0.21235500 | 5.70638600  | -0.26752800 |
| H | 4.92228000  | -1.62877400 | 2.23053600  |
| C | -1.52530900 | 3.37115800  | -0.58104200 |
| C | -1.85876500 | 3.35126300  | -1.95414300 |
| C | -2.52930500 | 3.22060000  | 0.39574000  |
| C | -3.19918000 | 3.19160200  | -2.31433900 |
| C | -3.85574300 | 3.05077500  | -0.01705400 |
| C | -4.21181000 | 3.03230300  | -1.36470000 |

|   |             |             |             |
|---|-------------|-------------|-------------|
| H | -3.45750000 | 3.17012900  | -3.36725100 |
| H | -4.63526900 | 2.93104500  | 0.73165900  |
| C | 3.89489600  | -1.87107800 | -0.27047400 |
| C | 3.26024600  | -3.11863800 | -0.07489600 |
| C | 4.72269200  | -1.66638500 | -1.39229500 |
| C | 3.49719100  | -4.14333900 | -0.99316500 |
| C | 4.91816900  | -2.72098800 | -2.28946500 |
| C | 4.32000800  | -3.96603500 | -2.10805900 |
| H | 3.01319000  | -5.10312900 | -0.84331400 |
| H | 5.55436500  | -2.56711900 | -3.15719100 |
| C | 1.74423200  | 5.07759000  | 0.40390800  |
| C | 4.41775700  | 5.48773600  | 1.15861600  |
| C | 3.59921000  | 6.59229800  | 0.82442900  |
| C | 2.29180700  | 6.38683500  | 0.45086500  |
| C | 3.91239000  | 4.20757600  | 1.13779300  |
| H | 5.45676500  | 5.65097000  | 1.42824700  |
| H | 4.00983400  | 7.59699200  | 0.85039200  |
| H | 1.65739200  | 7.22342600  | 0.17102200  |
| H | 4.55081500  | 3.36913900  | 1.38685400  |
| C | 4.37365100  | 1.13520300  | 5.15455600  |
| C | 3.55270300  | 2.23708400  | 4.81817900  |
| C | 3.01942800  | 2.35470300  | 3.55421100  |
| C | 4.62394600  | 0.15757500  | 4.22000300  |
| H | 4.79340400  | 1.05844900  | 6.15289000  |
| H | 3.33833600  | 2.99562700  | 5.56498100  |
| H | 2.38904100  | 3.20039000  | 3.30849100  |
| H | 5.23635700  | -0.70427500 | 4.47064600  |
| C | 0.71092600  | 2.48852800  | 0.24124000  |
| C | 2.92773500  | 0.37904100  | 0.38008400  |
| O | 2.35765600  | 0.42693100  | -0.88574000 |
| O | 0.17181900  | 1.21330200  | 0.15746900  |
| P | 0.74741300  | 0.16126400  | -0.99054300 |
| O | 0.41916800  | -1.21715400 | -0.43488100 |
| O | 0.30790100  | 0.54857600  | -2.36783000 |
| C | 5.42224000  | -0.33926700 | -1.65414900 |
| C | 4.95703200  | 0.28963600  | -2.97800500 |
| C | 6.95139400  | -0.49984500 | -1.61229200 |
| H | 5.15294600  | 0.35340500  | -0.85295000 |
| H | 3.87291700  | 0.42256000  | -2.98078600 |
| H | 5.42691300  | 1.26892300  | -3.12121500 |
| H | 5.22931400  | -0.33837300 | -3.83320100 |
| H | 7.27677600  | -0.91488000 | -0.65302400 |
| H | 7.30374000  | -1.17092000 | -2.40277900 |
| H | 7.44407500  | 0.46848500  | -1.75227200 |

|   |             |             |             |
|---|-------------|-------------|-------------|
| C | 4.54283800  | -5.09057700 | -3.10407400 |
| C | 3.23026500  | -5.49071600 | -3.79891600 |
| C | 5.21328300  | -6.30729000 | -2.44491600 |
| H | 5.22573700  | -4.71056200 | -3.87492400 |
| H | 2.76544700  | -4.62830700 | -4.28553400 |
| H | 3.40945400  | -6.26149900 | -4.55659200 |
| H | 2.51132900  | -5.89178500 | -3.07648800 |
| H | 6.16015200  | -6.02745400 | -1.97323700 |
| H | 4.56993300  | -6.73865800 | -1.67047300 |
| H | 5.41466100  | -7.08955900 | -3.18486400 |
| C | 2.32658200  | -3.37638300 | 1.10180700  |
| C | 3.04803100  | -4.12910700 | 2.23362800  |
| C | 1.05797300  | -4.14216200 | 0.68699400  |
| H | 2.00809000  | -2.40441000 | 1.48796400  |
| H | 3.91075500  | -3.57059000 | 2.60540500  |
| H | 2.36945100  | -4.30472000 | 3.07611800  |
| H | 3.40836600  | -5.10157300 | 1.87996800  |
| H | 0.59897100  | -3.68350100 | -0.19132000 |
| H | 1.27272100  | -5.19109400 | 0.45509400  |
| H | 0.33326400  | -4.13887200 | 1.51028300  |
| C | -2.20047200 | 3.21895200  | 1.88329900  |
| C | -2.32549400 | 1.80194900  | 2.46763300  |
| C | -3.05099800 | 4.22717200  | 2.67070400  |
| H | -1.15624400 | 3.52090300  | 1.99572400  |
| H | -1.68609900 | 1.10775600  | 1.91638300  |
| H | -2.02869400 | 1.78564400  | 3.52261100  |
| H | -3.36230100 | 1.44864300  | 2.40351200  |
| H | -2.94740100 | 5.23461900  | 2.25673400  |
| H | -4.11425500 | 3.96567800  | 2.64968800  |
| H | -2.73808700 | 4.25398700  | 3.71988000  |
| C | -0.79390300 | 3.51428200  | -3.03113400 |
| C | -0.61857600 | 4.99822700  | -3.40355800 |
| C | -1.08025500 | 2.68648900  | -4.29269700 |
| H | 0.14867300  | 3.14844700  | -2.61607300 |
| H | -0.31431000 | 5.59925600  | -2.54339500 |
| H | 0.14514200  | 5.10992100  | -4.18064500 |
| H | -1.55775500 | 5.41112900  | -3.78902900 |
| H | -1.31376800 | 1.64977400  | -4.04841300 |
| H | -1.91110200 | 3.10376900  | -4.87308300 |
| H | -0.19882200 | 2.68837300  | -4.94069800 |
| C | -5.65910200 | 2.84528200  | -1.78691900 |
| C | -5.84473800 | 1.59943700  | -2.66983700 |
| C | -6.19855600 | 4.10360900  | -2.48817100 |
| H | -6.24687200 | 2.69668700  | -0.87093100 |



|    |             |             |             |
|----|-------------|-------------|-------------|
| H  | -5.49848300 | 0.69676200  | -2.16042800 |
| H  | -6.90008600 | 1.46959400  | -2.93382600 |
| H  | -5.27741500 | 1.68963500  | -3.60178900 |
| H  | -6.09383200 | 4.98620100  | -1.84987400 |
| H  | -5.65089500 | 4.29674500  | -3.41663300 |
| H  | -7.25735500 | 3.98480000  | -2.74258600 |
| Ag | -1.15161400 | -1.57819000 | 0.92402200  |
| C  | -2.74030000 | -1.70309800 | 2.20938700  |
| C  | -3.78257800 | -2.67374100 | 2.31509500  |
| C  | -5.81253700 | -4.02730200 | 2.19901600  |
| O  | -3.18585200 | -3.25559400 | 3.26903100  |
| N  | -4.93150700 | -2.92734200 | 1.72120600  |
| C  | -5.44805600 | -1.92696400 | 0.73672300  |
| H  | -5.69215200 | -1.00135100 | 1.26896300  |
| H  | -6.38618200 | -2.34508700 | 0.36514900  |
| C  | -4.47614200 | -1.64981100 | -0.37468300 |
| C  | -4.22658700 | -2.60907000 | -1.38040100 |
| C  | -3.75494400 | -0.44952500 | -0.39027000 |
| C  | -3.25797000 | -2.34278900 | -2.34284400 |
| C  | -2.77684900 | -0.18751900 | -1.34953400 |
| H  | -3.96639700 | 0.31500400  | 0.35101100  |
| C  | -2.50968900 | -1.15112300 | -2.33792700 |
| H  | -3.04525700 | -3.06757500 | -3.12230300 |
| H  | -2.24339300 | 0.75327800  | -1.34267000 |
| H  | -6.56192300 | -4.13375500 | 1.40912900  |
| C  | -5.06296600 | -5.35573900 | 2.32530700  |
| H  | -5.78581200 | -6.15358300 | 2.51814800  |
| H  | -4.52752100 | -5.59512600 | 1.40278900  |
| H  | -4.34297000 | -5.33314200 | 3.14439400  |
| C  | -6.51053700 | -3.61884800 | 3.49981900  |
| H  | -5.77539900 | -3.48219400 | 4.29786300  |
| H  | -7.06780000 | -2.68584100 | 3.37336900  |
| H  | -7.21372300 | -4.39672800 | 3.81110000  |
| O  | -1.58757000 | -0.99498200 | -3.29593500 |
| H  | -0.87948800 | -0.35229700 | -3.00562000 |
| C  | -4.97477700 | -3.91886000 | -1.41665300 |
| H  | -4.71938900 | -4.55004600 | -0.55872500 |
| H  | -6.06119100 | -3.77022300 | -1.39658200 |
| H  | -4.73472900 | -4.47950200 | -2.32243100 |
| H  | -2.90066800 | -0.88950800 | 2.92239100  |

## TSC

Zero-point correction=

1.220798 (Hartree/Particle)

|                                              |              |
|----------------------------------------------|--------------|
| Thermal correction to Energy=                | 1.281077     |
| Thermal correction to Enthalpy=              | 1.281942     |
| Thermal correction to Gibbs Free Energy=     | 1.131241     |
| Sum of electronic and zero-point Energies=   | -3437.995024 |
| Sum of electronic and thermal Energies=      | -3437.934745 |
| Sum of electronic and thermal Enthalpies=    | -3437.933880 |
| Sum of electronic and thermal Free Energies= | -3438.084582 |

|   |             |             |             |
|---|-------------|-------------|-------------|
| C | 2.06373100  | 2.61682700  | 0.74916700  |
| C | 2.65426400  | 3.92426300  | 0.75675700  |
| C | 0.51506100  | 4.83914700  | -0.03953900 |
| C | -0.02848300 | 3.57651600  | -0.14277900 |
| C | 2.80843200  | 1.42194600  | 1.22692800  |
| C | 3.35386800  | 1.34353700  | 2.55163200  |
| C | 4.14026200  | 0.20063700  | 2.90698500  |
| C | 4.32681200  | -0.84056900 | 1.96248100  |
| C | 3.72391100  | -0.81922300 | 0.72317900  |
| H | -0.09647200 | 5.69994500  | -0.29154200 |
| H | 4.95039900  | -1.68651000 | 2.23289000  |
| C | -1.44702300 | 3.38617200  | -0.57657900 |
| C | -1.78451900 | 3.37341200  | -1.94889500 |
| C | -2.45152800 | 3.25633600  | 0.40242000  |
| C | -3.12934300 | 3.24545300  | -2.30568200 |
| C | -3.78266600 | 3.11663300  | -0.00685300 |
| C | -4.14306600 | 3.10955500  | -1.35354500 |
| H | -3.39086000 | 3.23217100  | -3.35796600 |
| H | -4.56264400 | 3.01520400  | 0.74418600  |
| C | 3.88740100  | -1.93900500 | -0.25158400 |
| C | 3.23062100  | -3.17204200 | -0.03772000 |
| C | 4.70940000  | -1.76168400 | -1.38212100 |
| C | 3.44044800  | -4.21050100 | -0.94701800 |
| C | 4.87737500  | -2.82903000 | -2.26984200 |
| C | 4.25726600  | -4.06048800 | -2.07037300 |
| H | 2.93952600  | -5.15926100 | -0.78325900 |
| H | 5.50894100  | -2.69622600 | -3.14442000 |
| C | 1.85406300  | 5.04811000  | 0.37485000  |
| C | 4.54017500  | 5.42423100  | 1.10153900  |
| C | 3.73595600  | 6.53797300  | 0.76300400  |
| C | 2.42227300  | 6.34910400  | 0.40308000  |
| C | 4.01476200  | 4.15201600  | 1.09895800  |
| H | 5.58403800  | 5.57393800  | 1.36002500  |
| H | 4.16242600  | 7.53631000  | 0.77467200  |
| H | 1.79853100  | 7.19248200  | 0.11964900  |
| H | 4.64238100  | 3.30642900  | 1.35114900  |

|   |            |             |             |
|---|------------|-------------|-------------|
| C | 4.47904700 | 1.11345300  | 5.13610600  |
| C | 3.66930400 | 2.22349900  | 4.79939600  |
| C | 3.12159000 | 2.33646500  | 3.54123500  |
| C | 4.70361900 | 0.12340700  | 4.20814300  |
| H | 4.91033000 | 1.04035300  | 6.12978400  |
| H | 3.47494000 | 2.99198400  | 5.54148100  |
| H | 2.49973100 | 3.18839400  | 3.29534400  |
| H | 5.30692000 | -0.74462500 | 4.45951800  |
| C | 0.77809300 | 2.47422800  | 0.25054400  |
| C | 2.96328800 | 0.33283100  | 0.38733100  |
| O | 2.38082100 | 0.37829100  | -0.87329800 |
| O | 0.21867000 | 1.20594400  | 0.18733800  |
| P | 0.76585800 | 0.14072500  | -0.96054500 |
| O | 0.42469100 | -1.23285700 | -0.39985500 |
| O | 0.31751600 | 0.53248600  | -2.33418300 |
| C | 5.43047500 | -0.45028500 | -1.66378800 |
| C | 4.96226600 | 0.17473300  | -2.98844700 |
| C | 6.95678500 | -0.63843700 | -1.63694600 |
| H | 5.18246800 | 0.25447000  | -0.86621300 |
| H | 3.88084700 | 0.32800100  | -2.98048300 |
| H | 5.44873700 | 1.14358700  | -3.14646300 |
| H | 5.21297100 | -0.46652900 | -3.84040000 |
| H | 7.28505400 | -1.05064100 | -0.67744800 |
| H | 7.28822700 | -1.32296500 | -2.42493100 |
| H | 7.46545600 | 0.31939400  | -1.79119900 |
| C | 4.45015200 | -5.19942600 | -3.05623100 |
| C | 3.12463800 | -5.58001100 | -3.73741100 |
| C | 5.10078300 | -6.42267100 | -2.38938200 |
| H | 5.13482400 | -4.84117100 | -3.83587600 |
| H | 2.67390400 | -4.71344500 | -4.22988500 |
| H | 3.28251200 | -6.36222000 | -4.48808700 |
| H | 2.40307000 | -5.95870200 | -3.00558100 |
| H | 6.05650900 | -6.15721600 | -1.92736300 |
| H | 4.45461500 | -6.83316100 | -1.60598200 |
| H | 5.28097800 | -7.21628400 | -3.12267600 |
| C | 2.30149700 | -3.39860800 | 1.14899600  |
| C | 3.01948000 | -4.14473100 | 2.28742700  |
| C | 1.01946700 | -4.15274900 | 0.75456900  |
| H | 1.99920100 | -2.41644000 | 1.52194500  |
| H | 3.89127100 | -3.59228400 | 2.64671500  |
| H | 2.34342600 | -4.29962700 | 3.13595900  |
| H | 3.36509900 | -5.12667400 | 1.94545400  |
| H | 0.56508800 | -3.70615000 | -0.13242600 |
| H | 1.21640800 | -5.20967800 | 0.54417200  |

|    |             |             |             |
|----|-------------|-------------|-------------|
| H  | 0.29743200  | -4.12064100 | 1.57955800  |
| C  | -2.11992300 | 3.24736700  | 1.88901400  |
| C  | -2.29411300 | 1.83701700  | 2.47604100  |
| C  | -2.93363000 | 4.28731900  | 2.67414000  |
| H  | -1.06559500 | 3.51270700  | 1.99917300  |
| H  | -1.67780200 | 1.12119800  | 1.92628500  |
| H  | -1.99966100 | 1.81171900  | 3.53129500  |
| H  | -3.34271000 | 1.52041700  | 2.41093400  |
| H  | -2.79286700 | 5.28956700  | 2.25847800  |
| H  | -4.00569100 | 4.06470000  | 2.65227000  |
| H  | -2.62086700 | 4.30453300  | 3.72354000  |
| C  | -0.71986800 | 3.51083500  | -3.02970500 |
| C  | -0.52253600 | 4.98837400  | -3.41618300 |
| C  | -1.02297600 | 2.67625000  | -4.28300300 |
| H  | 0.21784100  | 3.13390200  | -2.61375100 |
| H  | -0.20641300 | 5.59247600  | -2.56247700 |
| H  | 0.24054300  | 5.08099000  | -4.19638800 |
| H  | -1.45620700 | 5.41248200  | -3.80287100 |
| H  | -1.27071900 | 1.64531600  | -4.02858200 |
| H  | -1.84966800 | 3.10047700  | -4.86423100 |
| H  | -0.14398200 | 2.65941500  | -4.93413500 |
| C  | -5.59665600 | 2.96587800  | -1.77120400 |
| C  | -5.81889500 | 1.74996300  | -2.68638900 |
| C  | -6.10917700 | 4.25581800  | -2.43456300 |
| H  | -6.18226400 | 2.80686300  | -0.85556000 |
| H  | -5.48654800 | 0.82592800  | -2.20681800 |
| H  | -6.87971400 | 1.65010300  | -2.94107300 |
| H  | -5.26121200 | 1.85427500  | -3.62264600 |
| H  | -5.98055900 | 5.11740900  | -1.77241700 |
| H  | -5.56013800 | 4.46135800  | -3.35958000 |
| H  | -7.17155700 | 4.16956500  | -2.68721900 |
| Ag | -1.21126400 | -1.60102700 | 0.87411300  |
| C  | -2.87444600 | -1.65593700 | 2.05822300  |
| C  | -3.92197300 | -2.61296000 | 2.25603300  |
| C  | -6.02738000 | -3.85472300 | 2.22988900  |
| O  | -3.37038600 | -3.16648300 | 3.24627100  |
| N  | -5.08977700 | -2.84167700 | 1.67788200  |
| C  | -5.57016700 | -1.85157200 | 0.67087200  |
| H  | -5.83586300 | -0.91923200 | 1.18215000  |
| H  | -6.49166400 | -2.27190100 | 0.26181000  |
| C  | -4.55363900 | -1.58937600 | -0.40412200 |
| C  | -4.27571200 | -2.56701200 | -1.38533400 |
| C  | -3.82389800 | -0.39290800 | -0.41311800 |
| C  | -3.27859300 | -2.31889400 | -2.32166300 |

|   |             |             |             |
|---|-------------|-------------|-------------|
| C | -2.81243500 | -0.15157500 | -1.34536900 |
| H | -4.05603700 | 0.38616400  | 0.30701400  |
| C | -2.52579200 | -1.12883800 | -2.31471900 |
| H | -3.04503900 | -3.05610800 | -3.08327000 |
| H | -2.27116500 | 0.78498900  | -1.33441200 |
| H | -6.80858700 | -3.94278100 | 1.46860400  |
| C | -5.36271400 | -5.22411300 | 2.39004500  |
| H | -6.12468600 | -5.96110400 | 2.65948100  |
| H | -4.89293500 | -5.54414700 | 1.45616900  |
| H | -4.60165000 | -5.20822700 | 3.17138700  |
| C | -6.65454500 | -3.34801400 | 3.53262500  |
| H | -5.88679000 | -3.23101700 | 4.30222100  |
| H | -7.15104700 | -2.38447200 | 3.38322900  |
| H | -7.39919400 | -4.06217600 | 3.89588600  |
| O | -1.58209800 | -0.99326500 | -3.25305800 |
| H | -0.87164100 | -0.35217700 | -2.96018600 |
| C | -5.02681000 | -3.87496100 | -1.42120100 |
| H | -4.82068500 | -4.47782000 | -0.53043700 |
| H | -6.11197100 | -3.72205700 | -1.46346100 |
| H | -4.74149800 | -4.46389600 | -2.29527100 |
| H | -3.03814100 | -0.78922000 | 2.70670500  |

## CPB

|                                              |                             |
|----------------------------------------------|-----------------------------|
| Zero-point correction=                       | 1.233417 (Hartree/Particle) |
| Thermal correction to Energy=                | 1.295212                    |
| Thermal correction to Enthalpy=              | 1.296077                    |
| Thermal correction to Gibbs Free Energy=     | 1.142545                    |
| Sum of electronic and zero-point Energies=   | -3547.514702                |
| Sum of electronic and thermal Energies=      | -3547.452906                |
| Sum of electronic and thermal Enthalpies=    | -3547.452041                |
| Sum of electronic and thermal Free Energies= | -3547.605573                |

|   |             |             |             |
|---|-------------|-------------|-------------|
| C | 1.20173500  | -2.82425600 | 0.86135400  |
| C | 1.90017000  | -4.01894100 | 1.22955800  |
| C | 3.96053100  | -3.02897300 | 0.32087400  |
| C | 3.28076700  | -1.90139800 | -0.08744100 |
| C | -0.21471100 | -2.58479100 | 1.24031100  |
| C | -0.62590400 | -2.53218300 | 2.61308800  |
| C | -2.00824900 | -2.30109600 | 2.90655300  |
| C | -2.92163000 | -2.09514200 | 1.84221700  |
| C | -2.51955700 | -2.04964900 | 0.52298000  |
| H | 5.03659400  | -3.07689600 | 0.18272100  |
| H | -3.96864800 | -1.93776800 | 2.07870900  |

|   |             |             |             |
|---|-------------|-------------|-------------|
| C | 3.98912400  | -0.68730500 | -0.59624000 |
| C | 4.19757900  | -0.47947300 | -1.97627400 |
| C | 4.41537900  | 0.27472700  | 0.34352600  |
| C | 4.81191700  | 0.70591500  | -2.38760600 |
| C | 5.00396600  | 1.45651300  | -0.12043400 |
| C | 5.20243900  | 1.69478900  | -1.47986400 |
| H | 4.96144500  | 0.87707500  | -3.44745600 |
| H | 5.31771400  | 2.21398500  | 0.59258800  |
| C | -3.48450300 | -1.73047200 | -0.56925000 |
| C | -4.10481700 | -0.45811500 | -0.62264800 |
| C | -3.79508600 | -2.70524700 | -1.53992000 |
| C | -5.03124200 | -0.20404000 | -1.63497000 |
| C | -4.72119200 | -2.39425800 | -2.54031500 |
| C | -5.35143300 | -1.15406800 | -2.60709700 |
| H | -5.50628500 | 0.77121600  | -1.67543600 |
| H | -4.96174100 | -3.14413100 | -3.28912600 |
| C | 3.29986800  | -4.11849300 | 0.94421300  |
| C | 1.95985200  | -6.25641400 | 2.18265900  |
| C | 3.34775300  | -6.34449700 | 1.92166500  |
| C | 3.99971800  | -5.29723600 | 1.31297500  |
| C | 1.25394300  | -5.12343100 | 1.84650800  |
| H | 1.44634800  | -7.09288900 | 2.64680900  |
| H | 3.89237900  | -7.24313700 | 2.19446400  |
| H | 5.06273800  | -5.35784500 | 1.09637900  |
| H | 0.18944800  | -5.06697300 | 2.04118500  |
| C | -1.53064000 | -2.40700200 | 5.28998100  |
| C | -0.15844300 | -2.59439000 | 5.00202000  |
| C | 0.28395200  | -2.65454700 | 3.69863000  |
| C | -2.43204800 | -2.25706800 | 4.26177300  |
| H | -1.86601700 | -2.36703100 | 6.32161000  |
| H | 0.55333100  | -2.69106600 | 5.81629800  |
| H | 1.33652500  | -2.80007900 | 3.48882700  |
| H | -3.48571100 | -2.09171300 | 4.46895100  |
| C | 1.87836000  | -1.85158000 | 0.14399200  |
| C | -1.14489800 | -2.30552000 | 0.25457200  |
| O | -0.69680000 | -2.25363500 | -1.06123700 |
| O | 1.19220800  | -0.72763200 | -0.28068600 |
| P | 0.02241100  | -0.83596700 | -1.48068600 |
| O | -0.92352000 | 0.30781500  | -1.15764500 |
| O | 0.63320800  | -0.95252800 | -2.83733100 |
| C | -3.19308500 | -4.10428300 | -1.51638900 |
| C | -2.42410300 | -4.41644500 | -2.81022600 |
| C | -4.27710800 | -5.16017200 | -1.23695800 |
| H | -2.47815100 | -4.15915500 | -0.69243100 |

|   |             |             |             |
|---|-------------|-------------|-------------|
| H | -1.64604500 | -3.67075900 | -2.98598700 |
| H | -1.94992200 | -5.40156400 | -2.74202100 |
| H | -3.09228900 | -4.42997900 | -3.67795300 |
| H | -4.79500500 | -4.95250300 | -0.29513000 |
| H | -5.02838800 | -5.17891800 | -2.03348700 |
| H | -3.83326600 | -6.15952400 | -1.17171800 |
| C | -6.34630000 | -0.84151200 | -3.71073300 |
| C | -5.84420000 | 0.30271100  | -4.60763300 |
| C | -7.74140200 | -0.52974400 | -3.14418800 |
| H | -6.43250200 | -1.74088100 | -4.33401600 |
| H | -4.86104600 | 0.07005100  | -5.02689600 |
| H | -6.53974900 | 0.48352200  | -5.43440900 |
| H | -5.75093600 | 1.23401900  | -4.03870300 |
| H | -8.10940900 | -1.35500000 | -2.52705900 |
| H | -7.71992700 | 0.36978500  | -2.51953500 |
| H | -8.45996200 | -0.35682900 | -3.95262200 |
| C | -3.79681800 | 0.65963900  | 0.36763500  |
| C | -4.92364900 | 0.84920400  | 1.39704600  |
| C | -3.49896700 | 1.99844100  | -0.33381500 |
| H | -2.89570600 | 0.37174400  | 0.92079400  |
| H | -5.12370300 | -0.06921300 | 1.95563300  |
| H | -4.65752100 | 1.63457200  | 2.11327900  |
| H | -5.85468700 | 1.14168900  | 0.89919300  |
| H | -2.75525700 | 1.87356600  | -1.12276000 |
| H | -4.40347400 | 2.42997600  | -0.77554100 |
| H | -3.12490500 | 2.72362700  | 0.39809400  |
| C | 4.21907500  | 0.05905000  | 1.84132200  |
| C | 2.95143500  | 0.77295100  | 2.34102300  |
| C | 5.44256600  | 0.46930200  | 2.67322100  |
| H | 4.06502200  | -1.01060200 | 2.00301300  |
| H | 2.08295900  | 0.47856700  | 1.74689300  |
| H | 2.75813700  | 0.53337200  | 3.39355600  |
| H | 3.07430100  | 1.86024100  | 2.25669900  |
| H | 6.34876900  | -0.02391300 | 2.30994600  |
| H | 5.61531600  | 1.55018700  | 2.64383800  |
| H | 5.29784400  | 0.19021600  | 3.72225300  |
| C | 3.78418700  | -1.53238100 | -2.99466900 |
| C | 4.87836600  | -2.60765400 | -3.13166600 |
| C | 3.44196500  | -0.94761200 | -4.37138300 |
| H | 2.87639500  | -2.01105400 | -2.61812400 |
| H | 5.06924700  | -3.11356200 | -2.18209600 |
| H | 4.57954200  | -3.36533200 | -3.86384600 |
| H | 5.81839300  | -2.15843200 | -3.47157600 |
| H | 2.76585700  | -0.09521900 | -4.28916600 |

|    |             |             |             |
|----|-------------|-------------|-------------|
| H  | 4.34078000  | -0.62450900 | -4.90944500 |
| H  | 2.94985100  | -1.70903100 | -4.98260500 |
| C  | 5.79648500  | 3.00651800  | -1.96210600 |
| C  | 4.76281800  | 3.81617200  | -2.76489600 |
| C  | 7.08298600  | 2.78852000  | -2.77477100 |
| H  | 6.06027500  | 3.59053600  | -1.07036300 |
| H  | 3.85897800  | 3.99592800  | -2.17624700 |
| H  | 5.17936300  | 4.78185300  | -3.07138900 |
| H  | 4.46064700  | 3.27733900  | -3.66892900 |
| H  | 7.82506300  | 2.22868100  | -2.19740200 |
| H  | 6.87913400  | 2.22583900  | -3.69174100 |
| H  | 7.52438000  | 3.74774300  | -3.06538700 |
| Ag | -0.52955400 | 1.29650400  | 0.69969200  |
| C  | -0.15291400 | 2.35715100  | 2.58843000  |
| C  | -1.15155800 | 3.49974000  | 2.65118400  |
| C  | -1.74589100 | 5.79005100  | 2.03941600  |
| O  | -2.11358500 | 3.40227900  | 3.41142900  |
| N  | -0.91727200 | 4.56542700  | 1.83238600  |
| C  | 0.33073500  | 4.71756800  | 1.03748600  |
| H  | 1.19704200  | 4.47854800  | 1.66504300  |
| H  | 0.40890500  | 5.78786200  | 0.82955100  |
| C  | 0.43386400  | 3.92640500  | -0.25507900 |
| C  | -0.42321600 | 4.15090000  | -1.35878000 |
| C  | 1.46989400  | 2.98514600  | -0.40333600 |
| C  | -0.26292300 | 3.38324500  | -2.51138000 |
| C  | 1.62420600  | 2.22197600  | -1.55989300 |
| H  | 2.18691400  | 2.84669200  | 0.40082200  |
| C  | 0.71764700  | 2.38810700  | -2.61435600 |
| H  | -0.93713300 | 3.51705600  | -3.35119700 |
| H  | 2.41180800  | 1.48442200  | -1.62897900 |
| H  | -1.45790700 | 6.44599800  | 1.21531800  |
| C  | -3.25576300 | 5.55527300  | 1.92472300  |
| H  | -3.75141200 | 6.52467700  | 1.80920300  |
| H  | -3.49986500 | 4.94512900  | 1.05231100  |
| H  | -3.64865500 | 5.05482500  | 2.80759600  |
| C  | -1.36991300 | 6.47563700  | 3.35781600  |
| H  | -1.62347600 | 5.83198700  | 4.20321400  |
| H  | -0.29931400 | 6.70214700  | 3.39328000  |
| H  | -1.91947300 | 7.41596000  | 3.46419700  |
| O  | 0.75504200  | 1.63665000  | -3.73921400 |
| H  | 0.82926600  | 0.68007400  | -3.49895800 |
| C  | -1.51903100 | 5.18438700  | -1.32120100 |
| H  | -2.32430100 | 4.88783000  | -0.64486900 |
| H  | -1.14923600 | 6.15938100  | -0.98367100 |



|   |             |            |             |
|---|-------------|------------|-------------|
| H | -1.95301900 | 5.32111000 | -2.31397100 |
| H | 0.91263000  | 2.55121400 | 2.50013800  |
| N | -0.60175200 | 0.74392500 | 4.41736000  |
| N | -0.37260200 | 1.47944900 | 3.60063800  |

## TSA

|                                              |                             |
|----------------------------------------------|-----------------------------|
| Zero-point correction=                       | 1.229104 (Hartree/Particle) |
| Thermal correction to Energy=                | 1.290974                    |
| Thermal correction to Enthalpy=              | 1.291839                    |
| Thermal correction to Gibbs Free Energy=     | 1.137248                    |
| Sum of electronic and zero-point Energies=   | -3547.483893                |
| Sum of electronic and thermal Energies=      | -3547.422024                |
| Sum of electronic and thermal Enthalpies=    | -3547.421159                |
| Sum of electronic and thermal Free Energies= | -3547.575749                |

|   |             |             |             |
|---|-------------|-------------|-------------|
| C | -0.05543700 | -2.98567800 | 1.09226400  |
| C | 0.13366500  | -4.33464900 | 1.53471700  |
| C | 2.34413700  | -4.32067100 | 0.45670900  |
| C | 2.14410700  | -3.04210200 | -0.01862200 |
| C | -1.24727800 | -2.18862600 | 1.48251200  |
| C | -1.53897400 | -1.88459600 | 2.85251100  |
| C | -2.71628200 | -1.12606200 | 3.15112100  |
| C | -3.54787600 | -0.68086100 | 2.09188900  |
| C | -3.22774600 | -0.89130100 | 0.76675700  |
| H | 3.29586200  | -4.81002600 | 0.27198600  |
| H | -4.45146400 | -0.13200500 | 2.33561700  |
| C | 3.23935500  | -2.26661500 | -0.67727600 |
| C | 3.39451500  | -2.25896900 | -2.07993900 |
| C | 4.10908200  | -1.51701900 | 0.14155100  |
| C | 4.41179700  | -1.47875100 | -2.63521100 |
| C | 5.09871800  | -0.73435000 | -0.46407400 |
| C | 5.26128500  | -0.69515200 | -1.84829100 |
| H | 4.52884600  | -1.46112900 | -3.71282500 |
| H | 5.76431100  | -0.13972900 | 0.15581800  |
| C | -4.06968800 | -0.35143900 | -0.34066700 |
| C | -4.19689900 | 1.04586400  | -0.53030300 |
| C | -4.75210000 | -1.24198200 | -1.19623100 |
| C | -5.01447600 | 1.51273000  | -1.56102700 |
| C | -5.54978900 | -0.72139200 | -2.21953800 |
| C | -5.69572200 | 0.64903700  | -2.42094100 |
| H | -5.11193700 | 2.58410200  | -1.70565300 |
| H | -6.07625100 | -1.40581700 | -2.87931400 |
| C | 1.35337700  | -5.00757600 | 1.20337800  |

|   |             |             |             |
|---|-------------|-------------|-------------|
| C | -0.63511300 | -6.34257500 | 2.67339000  |
| C | 0.58084300  | -6.99806200 | 2.36682700  |
| C | 1.55062700  | -6.34246300 | 1.64452900  |
| C | -0.85372200 | -5.04511100 | 2.26886300  |
| H | -1.40504400 | -6.87050900 | 3.22775500  |
| H | 0.74061100  | -8.02059700 | 2.69468900  |
| H | 2.48332600  | -6.83917300 | 1.39162300  |
| H | -1.79136900 | -4.55383200 | 2.49982200  |
| C | -2.17754300 | -1.20944200 | 5.52229800  |
| C | -0.99643800 | -1.92926900 | 5.22492500  |
| C | -0.68465000 | -2.25967100 | 3.92451000  |
| C | -3.01501800 | -0.81531100 | 4.50447500  |
| H | -2.41366400 | -0.96023100 | 6.55214000  |
| H | -0.32902500 | -2.22284700 | 6.02952900  |
| H | 0.22204400  | -2.81055200 | 3.70570200  |
| H | -3.91641800 | -0.24750900 | 4.71808300  |
| C | 0.90283400  | -2.41242200 | 0.27278400  |
| C | -2.05425200 | -1.64986400 | 0.49748100  |
| O | -1.67640000 | -1.84469600 | -0.82835300 |
| O | 0.69649000  | -1.13210400 | -0.21299100 |
| P | -0.49668600 | -0.82612800 | -1.34110100 |
| O | -0.92924300 | 0.60393500  | -1.04421000 |
| O | -0.06472500 | -1.20037200 | -2.72027900 |
| C | -4.68887900 | -2.75431100 | -1.02371100 |
| C | -4.14133700 | -3.44967800 | -2.28053800 |
| C | -6.06449500 | -3.31595200 | -0.62340500 |
| H | -4.00437400 | -2.98084500 | -0.20322000 |
| H | -3.15824300 | -3.05322700 | -2.54275600 |
| H | -4.04552400 | -4.52713700 | -2.10754200 |
| H | -4.80967300 | -3.30993300 | -3.13691000 |
| H | -6.43037800 | -2.84314200 | 0.29360600  |
| H | -6.80849000 | -3.14211100 | -1.40794800 |
| H | -6.00427700 | -4.39628800 | -0.45243300 |
| C | -6.55979300 | 1.18517700  | -3.54850800 |
| C | -5.72083000 | 1.97281400  | -4.56907500 |
| C | -7.72438300 | 2.03574100  | -3.01490700 |
| H | -6.98981600 | 0.31886400  | -4.06756600 |
| H | -4.90542100 | 1.35961700  | -4.96354400 |
| H | -6.34090400 | 2.30646600  | -5.40826700 |
| H | -5.27548800 | 2.86087800  | -4.10792200 |
| H | -8.33610500 | 1.46698800  | -2.30804300 |
| H | -7.35483600 | 2.92611000  | -2.49486200 |
| H | -8.36803600 | 2.37211900  | -3.83488200 |
| C | -3.47888900 | 2.07077400  | 0.34055100  |

|    |             |             |             |
|----|-------------|-------------|-------------|
| C  | -4.44211000 | 2.73156200  | 1.34177000  |
| C  | -2.76119300 | 3.14946700  | -0.49260300 |
| H  | -2.71527800 | 1.54012000  | 0.91798400  |
| H  | -4.92914600 | 1.99333900  | 1.98488700  |
| H  | -3.90652700 | 3.44140600  | 1.98235200  |
| H  | -5.23045900 | 3.27946200  | 0.81421600  |
| H  | -2.13364300 | 2.69569100  | -1.26175000 |
| H  | -3.47428400 | 3.82245600  | -0.98019000 |
| H  | -2.13234400 | 3.76845000  | 0.15959900  |
| C  | 3.96644800  | -1.52197200 | 1.66014400  |
| C  | 3.17455900  | -0.29381800 | 2.13941900  |
| C  | 5.31294300  | -1.62737400 | 2.39016600  |
| H  | 3.38270200  | -2.40397800 | 1.93429400  |
| H  | 2.21755800  | -0.22128300 | 1.61717700  |
| H  | 2.98602800  | -0.34678200 | 3.21807300  |
| H  | 3.74697200  | 0.62109400  | 1.94119400  |
| H  | 5.88556000  | -2.49063700 | 2.03868900  |
| H  | 5.92996900  | -0.73459100 | 2.24419000  |
| H  | 5.15130400  | -1.73932900 | 3.46746400  |
| C  | 2.49603300  | -3.10624800 | -2.96970400 |
| C  | 3.04691500  | -4.54065900 | -3.07605800 |
| C  | 2.28765700  | -2.51202600 | -4.36889700 |
| H  | 1.51298200  | -3.15131500 | -2.49404100 |
| H  | 3.10987700  | -5.02177400 | -2.09679700 |
| H  | 2.39925100  | -5.15295000 | -3.71252400 |
| H  | 4.05043500  | -4.53578100 | -3.51638600 |
| H  | 2.00390700  | -1.45962200 | -4.31833600 |
| H  | 3.18859200  | -2.60137300 | -4.98678900 |
| H  | 1.48471700  | -3.04952200 | -4.88084500 |
| C  | 6.31986300  | 0.18958900  | -2.48329300 |
| C  | 5.68031700  | 1.28679900  | -3.35185600 |
| C  | 7.33841300  | -0.63249700 | -3.28983300 |
| H  | 6.86232500  | 0.68325300  | -1.66601300 |
| H  | 4.97349300  | 1.88739100  | -2.77287500 |
| H  | 6.44765700  | 1.95041200  | -3.76502800 |
| H  | 5.12776500  | 0.85010700  | -4.19027300 |
| H  | 7.81024600  | -1.39801500 | -2.66633600 |
| H  | 6.85565100  | -1.13879400 | -4.13226700 |
| H  | 8.12379000  | 0.01381200  | -3.69597600 |
| Ag | -0.05304900 | 1.60576700  | 0.57996700  |
| C  | 1.16707200  | 2.57551200  | 1.91032500  |
| C  | 1.12037800  | 4.03914200  | 2.27106300  |
| C  | 1.94798200  | 6.30665300  | 1.80317200  |
| O  | 0.43482800  | 4.42419300  | 3.22031600  |

|   |             |            |             |
|---|-------------|------------|-------------|
| N | 1.84843200  | 4.86069300 | 1.46112600  |
| C | 2.82484300  | 4.30539300 | 0.49497800  |
| H | 3.59443900  | 3.72957800 | 1.02745900  |
| H | 3.33545600  | 5.17232700 | 0.06675800  |
| C | 2.24451600  | 3.44903300 | -0.60987100 |
| C | 1.31461400  | 3.97351500 | -1.54351500 |
| C | 2.70827800  | 2.13493600 | -0.79761000 |
| C | 0.87474800  | 3.16706200 | -2.58780200 |
| C | 2.24762600  | 1.32574300 | -1.83306900 |
| H | 3.44979800  | 1.72576500 | -0.11773100 |
| C | 1.30817600  | 1.83940800 | -2.73956000 |
| H | 0.14866700  | 3.54448100 | -3.30053900 |
| H | 2.60512600  | 0.30991800 | -1.93508300 |
| H | 2.47264800  | 6.74630800 | 0.94952700  |
| C | 0.59217400  | 7.01042900 | 1.91439300  |
| H | 0.76205600  | 8.09052100 | 1.96860500  |
| H | -0.02848300 | 6.81085900 | 1.03814600  |
| H | 0.05176700  | 6.68974100 | 2.80329400  |
| C | 2.80759300  | 6.50575900 | 3.05688900  |
| H | 2.31608100  | 6.05722100 | 3.92303600  |
| H | 3.79488700  | 6.04891800 | 2.93423300  |
| H | 2.94929100  | 7.57305300 | 3.25289400  |
| O | 0.80702300  | 1.12802000 | -3.76751700 |
| H | 0.59635300  | 0.20239900 | -3.48172800 |
| C | 0.76647500  | 5.37143600 | -1.41684100 |
| H | 0.03854500  | 5.43208500 | -0.60204700 |
| H | 1.55011200  | 6.10629900 | -1.20327500 |
| H | 0.26412100  | 5.67406200 | -2.33825900 |
| H | 2.15224200  | 2.11919800 | 2.01856100  |
| N | 0.04189100  | 1.32290700 | 4.41455500  |
| N | 0.61582200  | 1.87414100 | 3.64583800  |

## CPC

|                                              |                             |
|----------------------------------------------|-----------------------------|
| Zero-point correction=                       | 1.219603 (Hartree/Particle) |
| Thermal correction to Energy=                | 1.280069                    |
| Thermal correction to Enthalpy=              | 1.280934                    |
| Thermal correction to Gibbs Free Energy=     | 1.128554                    |
| Sum of electronic and zero-point Energies=   | -3438.026042                |
| Sum of electronic and thermal Energies=      | -3437.965576                |
| Sum of electronic and thermal Enthalpies=    | -3437.964711                |
| Sum of electronic and thermal Free Energies= | -3438.117092                |

|   |            |            |            |
|---|------------|------------|------------|
| C | 2.39578700 | 2.51299100 | 0.68919400 |
|---|------------|------------|------------|

|   |             |             |             |
|---|-------------|-------------|-------------|
| C | 3.06217600  | 3.77969300  | 0.57829200  |
| C | 0.92813200  | 4.78722600  | -0.11488900 |
| C | 0.30685300  | 3.55667800  | -0.11520300 |
| C | 3.10588600  | 1.29773600  | 1.16834000  |
| C | 3.77404600  | 1.25288600  | 2.43768900  |
| C | 4.52502000  | 0.08259200  | 2.78002800  |
| C | 4.54914600  | -1.01979500 | 1.88831500  |
| C | 3.82242200  | -1.02762800 | 0.71728700  |
| H | 0.35573300  | 5.66916600  | -0.38432300 |
| H | 5.14100100  | -1.89082200 | 2.14960400  |
| C | -1.12792600 | 3.42590500  | -0.51183200 |
| C | -1.49365400 | 3.52364200  | -1.87309500 |
| C | -2.11691600 | 3.26265300  | 0.47786200  |
| C | -2.85149800 | 3.50742500  | -2.20780700 |
| C | -3.46122800 | 3.23349200  | 0.09096300  |
| C | -3.85234600 | 3.36706700  | -1.24217800 |
| H | -3.13242300 | 3.60271600  | -3.25118000 |
| H | -4.22869900 | 3.12101800  | 0.85340700  |
| C | 3.79225400  | -2.21457500 | -0.18928500 |
| C | 3.05763000  | -3.36692700 | 0.17345200  |
| C | 4.49790100  | -2.17846700 | -1.40794800 |
| C | 3.07540200  | -4.46911600 | -0.68332600 |
| C | 4.47475100  | -3.30497900 | -2.23642700 |
| C | 3.77424900  | -4.45922900 | -1.89317400 |
| H | 2.51435700  | -5.35580100 | -0.40634900 |
| H | 5.01676400  | -3.28167200 | -3.17830900 |
| C | 2.30215700  | 4.93214500  | 0.19897300  |
| C | 5.05502600  | 5.17309700  | 0.69377000  |
| C | 4.29301800  | 6.31821100  | 0.36267400  |
| C | 2.94601200  | 6.19512300  | 0.11570400  |
| C | 4.45727900  | 3.93763400  | 0.79868300  |
| H | 6.12351600  | 5.26860400  | 0.86105100  |
| H | 4.77688000  | 7.28732900  | 0.29002000  |
| H | 2.35208400  | 7.06129900  | -0.16280800 |
| H | 5.05332400  | 3.06791000  | 1.04440100  |
| C | 5.13907300  | 1.08663000  | 4.90845600  |
| C | 4.36208300  | 2.22504100  | 4.59009100  |
| C | 3.69736300  | 2.30687200  | 3.38727800  |
| C | 5.21239800  | 0.03793100  | 4.02178000  |
| H | 5.66311800  | 1.03814400  | 5.85799900  |
| H | 4.28477000  | 3.03979400  | 5.30356500  |
| H | 3.09980900  | 3.18021500  | 3.15711600  |
| H | 5.78656600  | -0.85231700 | 4.26313000  |
| C | 1.06923400  | 2.43162800  | 0.29590600  |

|   |             |             |             |
|---|-------------|-------------|-------------|
| C | 3.11205600  | 0.15640500  | 0.38636700  |
| O | 2.41125500  | 0.17216800  | -0.81835700 |
| O | 0.41536600  | 1.20727500  | 0.35809400  |
| P | 0.79241200  | 0.02998700  | -0.72142100 |
| O | 0.40864000  | -1.28107400 | -0.07672200 |
| O | 0.26133600  | 0.38913600  | -2.09925200 |
| C | 5.29305900  | -0.95668500 | -1.84844100 |
| C | 4.74176000  | -0.36947500 | -3.15840100 |
| C | 6.79213300  | -1.28099300 | -1.96339200 |
| H | 5.19130100  | -0.18736500 | -1.07876700 |
| H | 3.68398000  | -0.11808400 | -3.05249800 |
| H | 5.28865100  | 0.54030600  | -3.42949300 |
| H | 4.84563900  | -1.07918400 | -3.98625900 |
| H | 7.18460600  | -1.66445800 | -1.01627600 |
| H | 6.97826200  | -2.03811600 | -2.73244300 |
| H | 7.36081700  | -0.38435900 | -2.23282400 |
| C | 3.75591100  | -5.66402000 | -2.81755700 |
| C | 2.33529100  | -5.95067700 | -3.33330100 |
| C | 4.36047200  | -6.90654800 | -2.14318700 |
| H | 4.38183800  | -5.41736100 | -3.68495100 |
| H | 1.91597900  | -5.07298100 | -3.83421400 |
| H | 2.33862400  | -6.78573000 | -4.04247000 |
| H | 1.66564500  | -6.21475600 | -2.50772400 |
| H | 5.38036900  | -6.71020900 | -1.79901000 |
| H | 3.76780400  | -7.20926900 | -1.27330400 |
| H | 4.38817600  | -7.75252000 | -2.83852600 |
| C | 2.24924000  | -3.43836200 | 1.46373100  |
| C | 3.03751000  | -4.15153800 | 2.57710000  |
| C | 0.88635300  | -4.12614400 | 1.27085700  |
| H | 2.05116900  | -2.41281700 | 1.78527200  |
| H | 3.97640400  | -3.63972200 | 2.80169600  |
| H | 2.44789600  | -4.19727200 | 3.49938100  |
| H | 3.28034400  | -5.17742000 | 2.27834300  |
| H | 0.37318900  | -3.73062300 | 0.39151000  |
| H | 0.98901900  | -5.21000000 | 1.14783800  |
| H | 0.25506400  | -3.96157200 | 2.15137000  |
| C | -1.76535200 | 3.14635700  | 1.95442000  |
| C | -2.18887100 | 1.78539200  | 2.52815400  |
| C | -2.36228800 | 4.31059900  | 2.76264000  |
| H | -0.67894100 | 3.21309300  | 2.04899800  |
| H | -1.72124400 | 0.97046700  | 1.97006500  |
| H | -1.88786900 | 1.69695500  | 3.57725200  |
| H | -3.27642400 | 1.65555200  | 2.48486700  |
| H | -2.02874000 | 5.27469100  | 2.36630400  |

|    |             |             |             |
|----|-------------|-------------|-------------|
| H  | -3.45712100 | 4.29792100  | 2.73438000  |
| H  | -2.05537000 | 4.24610200  | 3.81173600  |
| C  | -0.45198200 | 3.66299500  | -2.97721500 |
| C  | -0.33558500 | 5.12715100  | -3.43779500 |
| C  | -0.73390800 | 2.74805700  | -4.17924500 |
| H  | 0.51213100  | 3.35850000  | -2.56206200 |
| H  | -0.06038000 | 5.78877100  | -2.61247200 |
| H  | 0.42492600  | 5.22586900  | -4.21957500 |
| H  | -1.28889600 | 5.48095600  | -3.84622800 |
| H  | -0.83073600 | 1.70805900  | -3.86579600 |
| H  | -1.64335400 | 3.04174600  | -4.71440700 |
| H  | 0.09513800  | 2.80723500  | -4.89150900 |
| C  | -5.32663600 | 3.40590400  | -1.61163900 |
| C  | -5.67065100 | 2.53437700  | -2.82930000 |
| C  | -5.78097300 | 4.85965300  | -1.83582800 |
| H  | -5.88541400 | 3.01338500  | -0.75072800 |
| H  | -5.33664100 | 1.50189900  | -2.69313100 |
| H  | -6.75205700 | 2.52742900  | -3.00001400 |
| H  | -5.19952400 | 2.91744700  | -3.74016200 |
| H  | -5.57935600 | 5.47440900  | -0.95373600 |
| H  | -5.24305200 | 5.30199600  | -2.68126500 |
| H  | -6.85351600 | 4.90710100  | -2.05323800 |
| Ag | -1.51362500 | -1.69635000 | 0.83774500  |
| C  | -3.60814200 | -1.50653600 | 1.10270200  |
| C  | -4.55055700 | -2.29063900 | 1.97368600  |
| C  | -7.00523400 | -2.82898300 | 2.03569700  |
| O  | -4.29374000 | -2.75054800 | 3.08087500  |
| N  | -5.78769000 | -2.36444200 | 1.35726900  |
| C  | -5.85938400 | -1.52936600 | 0.17244500  |
| H  | -6.23087700 | -0.51748400 | 0.39977500  |
| H  | -6.52916700 | -1.96785100 | -0.57564100 |
| C  | -4.39437400 | -1.44764400 | -0.31520800 |
| C  | -3.97900800 | -2.62797700 | -1.14730900 |
| C  | -3.96211300 | -0.14724200 | -0.85976900 |
| C  | -3.04234900 | -2.47580100 | -2.11937000 |
| C  | -2.92053300 | -0.02907400 | -1.71816200 |
| H  | -4.38317800 | 0.74626700  | -0.41125400 |
| C  | -2.37763500 | -1.22087500 | -2.31433900 |
| H  | -2.65546700 | -3.32623800 | -2.67057500 |
| H  | -2.49508600 | 0.93453800  | -1.96892000 |
| H  | -7.80046300 | -2.75606600 | 1.28332900  |
| C  | -6.87518600 | -4.29699400 | 2.45440600  |
| H  | -7.81251300 | -4.64351800 | 2.90069900  |
| H  | -6.65259000 | -4.92776900 | 1.58847000  |

|   |             |             |             |
|---|-------------|-------------|-------------|
| H | -6.07101400 | -4.40936500 | 3.18275200  |
| C | -7.36274200 | -1.91664700 | 3.21613700  |
| H | -6.57409600 | -1.96309100 | 3.97034800  |
| H | -7.47260700 | -0.87764300 | 2.88811800  |
| H | -8.30660200 | -2.23065900 | 3.67264600  |
| O | -1.30265900 | -1.21217600 | -3.02238500 |
| H | -0.60522100 | -0.43415900 | -2.69813400 |
| C | -4.48126200 | -3.99890200 | -0.81145700 |
| H | -4.10311100 | -4.30074600 | 0.17162200  |
| H | -5.57223700 | -4.03633300 | -0.75011000 |
| H | -4.13950100 | -4.72563300 | -1.55133200 |
| H | -3.63946200 | -0.49056200 | 1.52136000  |

## TSF

|                                              |                             |
|----------------------------------------------|-----------------------------|
| Zero-point correction=                       | 1.220526 (Hartree/Particle) |
| Thermal correction to Energy=                | 1.279681                    |
| Thermal correction to Enthalpy=              | 1.280546                    |
| Thermal correction to Gibbs Free Energy=     | 1.133056                    |
| Sum of electronic and zero-point Energies=   | -3438.007411                |
| Sum of electronic and thermal Energies=      | -3437.948256                |
| Sum of electronic and thermal Enthalpies=    | -3437.947391                |
| Sum of electronic and thermal Free Energies= | -3438.094881                |

|   |             |             |             |
|---|-------------|-------------|-------------|
| C | -2.68272600 | -2.49822700 | 0.18505000  |
| C | -3.27280100 | -3.75263300 | -0.18646500 |
| C | -1.01262800 | -4.63554800 | -0.63080400 |
| C | -0.44625600 | -3.40485300 | -0.38005600 |
| C | -3.47771300 | -1.35534000 | 0.71394100  |
| C | -4.32877400 | -1.48105600 | 1.86510800  |
| C | -5.08918500 | -0.34329200 | 2.29111400  |
| C | -4.91527200 | 0.90397600  | 1.63749900  |
| C | -4.01224500 | 1.06362000  | 0.61038200  |
| H | -0.37681500 | -5.46856400 | -0.91356800 |
| H | -5.48172000 | 1.76041200  | 1.98821100  |
| C | 1.01600300  | -3.13675800 | -0.52485400 |
| C | 1.61205800  | -3.12787700 | -1.80307200 |
| C | 1.79911600  | -2.85826700 | 0.61869200  |
| C | 2.99000300  | -2.89293100 | -1.90756600 |
| C | 3.16171800  | -2.59771700 | 0.46171800  |
| C | 3.78296000  | -2.62793200 | -0.79221500 |
| H | 3.44251300  | -2.91488800 | -2.89232700 |
| H | 3.76195200  | -2.36448700 | 1.33485700  |
| C | -3.65477700 | 2.38957300  | 0.02096800  |



|   |             |             |             |
|---|-------------|-------------|-------------|
| C | -2.82753900 | 3.27581600  | 0.75141100  |
| C | -4.03925000 | 2.70571800  | -1.29570400 |
| C | -2.40681700 | 4.45691900  | 0.13992500  |
| C | -3.58365600 | 3.89775800  | -1.86749400 |
| C | -2.75301300 | 4.77567400  | -1.17526000 |
| H | -1.75699400 | 5.12945700  | 0.68998000  |
| H | -3.86414400 | 4.13688000  | -2.88985200 |
| C | -2.41606600 | -4.83555600 | -0.57019000 |
| C | -5.20521000 | -5.18047200 | -0.57878400 |
| C | -4.35699600 | -6.26161800 | -0.91420600 |
| C | -2.99277100 | -6.08690200 | -0.91384400 |
| C | -4.67775400 | -3.95906100 | -0.22492600 |
| H | -6.28246800 | -5.31326200 | -0.60672600 |
| H | -4.78577500 | -7.22148300 | -1.18535400 |
| H | -2.33043600 | -6.90202800 | -1.19233200 |
| H | -5.33586900 | -3.13510300 | 0.02194600  |
| C | -6.06133700 | -1.65135300 | 4.09756900  |
| C | -5.27080000 | -2.75890700 | 3.71261400  |
| C | -4.42660300 | -2.67598600 | 2.62797500  |
| C | -5.96353700 | -0.46841900 | 3.40291200  |
| H | -6.72891200 | -1.73263100 | 4.94990500  |
| H | -5.32535500 | -3.68239700 | 4.28107500  |
| H | -3.82144000 | -3.52932700 | 2.34986300  |
| H | -6.54243500 | 0.40023000  | 3.70469400  |
| C | -1.31325000 | -2.35625700 | 0.02637800  |
| C | -3.34277500 | -0.10089200 | 0.14256200  |
| O | -2.52874000 | 0.04594800  | -0.97248900 |
| O | -0.72285800 | -1.13745600 | 0.31634200  |
| P | -0.91257000 | 0.09522400  | -0.75730100 |
| O | -0.52212600 | 1.33151800  | 0.04093800  |
| O | -0.27460000 | -0.20126700 | -2.08473800 |
| C | -4.93775000 | 1.78853900  | -2.11317500 |
| C | -4.27629900 | 1.36091900  | -3.43342000 |
| C | -6.30622800 | 2.44751800  | -2.35893100 |
| H | -5.11686000 | 0.88211400  | -1.52856600 |
| H | -3.30970200 | 0.88848400  | -3.24616100 |
| H | -4.91463300 | 0.64571900  | -3.96356400 |
| H | -4.11879400 | 2.21749500  | -4.09756800 |
| H | -6.79234500 | 2.70923900  | -1.41370300 |
| H | -6.20178400 | 3.36651600  | -2.94581700 |
| H | -6.96833400 | 1.77074400  | -2.90992900 |
| C | -2.17680100 | 6.00261900  | -1.85907200 |
| C | -0.66641200 | 5.81552800  | -2.09878300 |
| C | -2.45993700 | 7.29916400  | -1.08536700 |

|   |             |             |             |
|---|-------------|-------------|-------------|
| H | -2.65992600 | 6.08623900  | -2.84101500 |
| H | -0.47411700 | 4.89762700  | -2.66285700 |
| H | -0.24650400 | 6.66252400  | -2.65278700 |
| H | -0.13518500 | 5.73875800  | -1.14264300 |
| H | -3.53396000 | 7.43768900  | -0.92925200 |
| H | -1.97901600 | 7.28746100  | -0.10136800 |
| H | -2.07665600 | 8.16849700  | -1.63046600 |
| C | -2.36850000 | 2.96652000  | 2.17215200  |
| C | -3.31372700 | 3.60321400  | 3.20795400  |
| C | -0.92439100 | 3.41423500  | 2.45972100  |
| H | -2.40118200 | 1.88137800  | 2.30063800  |
| H | -4.34055100 | 3.25096300  | 3.08858200  |
| H | -2.99051600 | 3.36664900  | 4.22786800  |
| H | -3.32126300 | 4.69329700  | 3.09712000  |
| H | -0.25509400 | 3.09406000  | 1.65657900  |
| H | -0.84263500 | 4.50258600  | 2.55455500  |
| H | -0.58087300 | 2.98065200  | 3.40529300  |
| C | 1.22437500  | -2.90214800 | 2.02970700  |
| C | 1.41628700  | -1.57619100 | 2.78470600  |
| C | 1.83589800  | -4.07492200 | 2.81768100  |
| H | 0.15018400  | -3.08769100 | 1.95956300  |
| H | 0.87211500  | -0.77403900 | 2.27060100  |
| H | 1.00733400  | -1.64965100 | 3.79850900  |
| H | 2.47154000  | -1.29830000 | 2.86006000  |
| H | 1.67810700  | -5.02209500 | 2.29248600  |
| H | 2.91414900  | -3.94012000 | 2.95139600  |
| H | 1.37967200  | -4.15253800 | 3.81042800  |
| C | 0.81365000  | -3.38016400 | -3.07652600 |
| C | 1.07340100  | -4.80081400 | -3.60890800 |
| C | 1.09533700  | -2.33421100 | -4.16694800 |
| H | -0.24679300 | -3.30031100 | -2.82709800 |
| H | 0.82742300  | -5.56252500 | -2.86321100 |
| H | 0.47327400  | -4.99446000 | -4.50449600 |
| H | 2.12856800  | -4.92878900 | -3.87557500 |
| H | 0.90036300  | -1.33023800 | -3.78914000 |
| H | 2.12789700  | -2.38692000 | -4.52953600 |
| H | 0.44104700  | -2.50815400 | -5.02773900 |
| C | 5.29021700  | -2.42550400 | -0.87063600 |
| C | 5.81589100  | -2.13831400 | -2.28155900 |
| C | 6.02190400  | -3.64060600 | -0.26942500 |
| H | 5.53367200  | -1.56691200 | -0.23198000 |
| H | 5.29371600  | -1.30318300 | -2.75942700 |
| H | 6.88299100  | -1.89657200 | -2.24623200 |
| H | 5.70171400  | -3.01131400 | -2.93284200 |

|    |            |             |             |
|----|------------|-------------|-------------|
| H  | 5.70246100 | -3.82242400 | 0.75991200  |
| H  | 5.80803000 | -4.54250900 | -0.85326000 |
| H  | 7.10595600 | -3.48169600 | -0.26860100 |
| Ag | 1.44506200 | 1.25856900  | 0.91429200  |
| C  | 3.68075200 | 0.87754000  | 0.52050400  |
| C  | 4.80543000 | 0.48184500  | 1.39895600  |
| C  | 7.13834100 | 1.24774700  | 1.88913700  |
| O  | 4.78832500 | -0.42756500 | 2.22846800  |
| N  | 5.88646500 | 1.28206100  | 1.11774000  |
| C  | 5.51273000 | 2.47323500  | 0.37518600  |
| H  | 6.26906900 | 2.72544300  | -0.37656000 |
| H  | 5.40817200 | 3.33194300  | 1.04988800  |
| C  | 4.16963100 | 2.15934200  | -0.29851400 |
| C  | 3.28150700 | 3.30961400  | -0.62335000 |
| C  | 4.15981000 | 1.00589900  | -1.19346500 |
| C  | 2.33000900 | 3.12813000  | -1.56207400 |
| C  | 3.06007800 | 0.84227000  | -2.10375700 |
| H  | 5.05983800 | 0.41361300  | -1.30336600 |
| C  | 2.13658000 | 1.85272400  | -2.23788100 |
| H  | 1.61672800 | 3.90964200  | -1.80058700 |
| H  | 2.94122900 | -0.08902400 | -2.64416500 |
| H  | 7.78675800 | 1.99149900  | 1.41044900  |
| C  | 6.90497900 | 1.66223100  | 3.34709100  |
| H  | 7.85519200 | 1.70770900  | 3.88780500  |
| H  | 6.43553800 | 2.65003400  | 3.40397000  |
| H  | 6.25376000 | 0.93728500  | 3.83994000  |
| C  | 7.81167500 | -0.12263200 | 1.76678500  |
| H  | 7.18825900 | -0.89321400 | 2.22225200  |
| H  | 7.97066500 | -0.37916400 | 0.71499400  |
| H  | 8.78317700 | -0.10774800 | 2.26995400  |
| O  | 1.04046000 | 1.78187500  | -2.99359200 |
| H  | 0.53832600 | 0.92787000  | -2.79053000 |
| C  | 3.41753200 | 4.59887000  | 0.13436600  |
| H  | 3.32885200 | 4.43055800  | 1.21617900  |
| H  | 4.38551800 | 5.08420600  | -0.03593700 |
| H  | 2.63410100 | 5.29816300  | -0.16486100 |
| H  | 3.01244800 | 0.04979700  | 0.27042200  |

### CPF

|                                          |                             |
|------------------------------------------|-----------------------------|
| Zero-point correction=                   | 1.339234 (Hartree/Particle) |
| Thermal correction to Energy=            | 1.405466                    |
| Thermal correction to Enthalpy=          | 1.406331                    |
| Thermal correction to Gibbs Free Energy= | 1.243410                    |

|                                              |              |
|----------------------------------------------|--------------|
| Sum of electronic and zero-point Energies=   | -3858.743029 |
| Sum of electronic and thermal Energies=      | -3858.676797 |
| Sum of electronic and thermal Enthalpies=    | -3858.675932 |
| Sum of electronic and thermal Free Energies= | -3858.838853 |

|   |             |             |             |
|---|-------------|-------------|-------------|
| C | -1.71517100 | 3.09199000  | -0.26203400 |
| C | -2.27619300 | 4.13846800  | 0.54683200  |
| C | -0.07383900 | 4.42128100  | 1.62751300  |
| C | 0.44362500  | 3.35132500  | 0.93137300  |
| C | -2.51399100 | 2.37714500  | -1.29745100 |
| C | -3.19520900 | 3.06757900  | -2.35754000 |
| C | -4.07238200 | 2.33128200  | -3.22011400 |
| C | -4.25759500 | 0.93786000  | -3.01346400 |
| C | -3.54599500 | 0.25595800  | -2.05390900 |
| H | 0.55826800  | 4.96025500  | 2.32603200  |
| H | -4.98720800 | 0.40800300  | -3.61831100 |
| C | 1.83974700  | 2.85127300  | 1.12419000  |
| C | 2.17831600  | 2.13697800  | 2.29248200  |
| C | 2.81183200  | 3.06168700  | 0.12127600  |
| C | 3.50217700  | 1.71633100  | 2.46914600  |
| C | 4.11022800  | 2.59246200  | 0.32784300  |
| C | 4.48520600  | 1.93915000  | 1.50470800  |
| H | 3.76083800  | 1.18967500  | 3.38058900  |
| H | 4.85640300  | 2.72783200  | -0.44946800 |
| C | -3.76758500 | -1.17467500 | -1.67664300 |
| C | -3.00960900 | -2.21210400 | -2.26009500 |
| C | -4.64907500 | -1.44542300 | -0.61144400 |
| C | -3.13682000 | -3.50308100 | -1.74453300 |
| C | -4.73159800 | -2.75325400 | -0.12032000 |
| C | -3.97523500 | -3.79035500 | -0.66227300 |
| H | -2.55025600 | -4.30315700 | -2.18188600 |
| H | -5.38907200 | -2.96514800 | 0.71877700  |
| C | -1.42711800 | 4.82314200  | 1.47746400  |
| C | -4.14205000 | 5.52045800  | 1.27989900  |
| C | -3.29321200 | 6.22542100  | 2.16440000  |
| C | -1.96625100 | 5.87684200  | 2.26176000  |
| C | -3.64774100 | 4.50465100  | 0.49274100  |
| H | -5.19521000 | 5.77884800  | 1.22459100  |
| H | -3.69430900 | 7.02926800  | 2.77406300  |
| H | -1.30769000 | 6.39413200  | 2.95416800  |
| H | -4.30988700 | 3.96703600  | -0.17411000 |
| C | -4.56267800 | 4.36240500  | -4.46701600 |
| C | -3.67160200 | 5.08249100  | -3.63819300 |
| C | -3.00687100 | 4.45247900  | -2.61001300 |

|   |             |             |             |
|---|-------------|-------------|-------------|
| C | -4.75317500 | 3.01557400  | -4.26077500 |
| H | -5.08507500 | 4.87197300  | -5.27085200 |
| H | -3.50578100 | 6.14043200  | -3.81745300 |
| H | -2.31996000 | 5.01047100  | -1.98541800 |
| H | -5.42296900 | 2.44755900  | -4.90059500 |
| C | -0.40896800 | 2.71420800  | -0.00812600 |
| C | -2.63558400 | 0.99901900  | -1.25416800 |
| O | -1.91339300 | 0.27045600  | -0.32012400 |
| O | 0.14447400  | 1.68880900  | -0.74996600 |
| P | -0.29033200 | 0.13909500  | -0.45700300 |
| O | 0.17931200  | -0.58485400 | -1.70235800 |
| O | 0.14480400  | -0.36149100 | 0.90358800  |
| C | -5.49366700 | -0.35189200 | 0.03168800  |
| C | -5.05372800 | -0.07747700 | 1.47778300  |
| C | -6.99282900 | -0.68558400 | -0.03837600 |
| H | -5.34348900 | 0.56864900  | -0.53712000 |
| H | -3.98609600 | 0.15087800  | 1.52988500  |
| H | -5.60867500 | 0.77027800  | 1.89502500  |
| H | -5.24292400 | -0.94503000 | 2.11594300  |
| H | -7.31131600 | -0.85553400 | -1.07165500 |
| H | -7.22981800 | -1.58681100 | 0.53684400  |
| H | -7.58787500 | 0.13675800  | 0.37353300  |
| C | -4.08192600 | -5.20078000 | -0.10755800 |
| C | -2.71775100 | -5.75351000 | 0.33712000  |
| C | -4.75547400 | -6.14292100 | -1.12006100 |
| H | -4.72798800 | -5.14961800 | 0.77922400  |
| H | -2.24827700 | -5.09855000 | 1.07467400  |
| H | -2.83042100 | -6.75240200 | 0.77335800  |
| H | -2.03077300 | -5.83645600 | -0.51130400 |
| H | -5.74078200 | -5.76715100 | -1.41202100 |
| H | -4.15039000 | -6.23188900 | -2.02877000 |
| H | -4.87908400 | -7.14693000 | -0.69919100 |
| C | -2.10212100 | -1.93288000 | -3.45049100 |
| C | -2.91113900 | -1.98763900 | -4.75950100 |
| C | -0.88767000 | -2.86726800 | -3.52913500 |
| H | -1.71154600 | -0.91832100 | -3.33335000 |
| H | -3.72965200 | -1.26302000 | -4.75470600 |
| H | -2.26966200 | -1.76872700 | -5.62032700 |
| H | -3.34551600 | -2.98365200 | -4.90197600 |
| H | -0.35816300 | -2.88227600 | -2.57597100 |
| H | -1.17569400 | -3.89030500 | -3.79829500 |
| H | -0.19669900 | -2.50847300 | -4.29898500 |
| C | 2.49899000  | 3.80734800  | -1.16926900 |
| C | 2.75076200  | 2.93582800  | -2.41083700 |

|    |            |             |             |
|----|------------|-------------|-------------|
| C  | 3.29290700 | 5.12358400  | -1.24298700 |
| H  | 1.43857200 | 4.07186900  | -1.16485400 |
| H  | 2.11727100 | 2.04389200  | -2.38421200 |
| H  | 2.51149800 | 3.49176100  | -3.32411100 |
| H  | 3.79454900 | 2.61314600  | -2.47344800 |
| H  | 3.08805400 | 5.75397400  | -0.37189400 |
| H  | 4.37099300 | 4.93397500  | -1.27298800 |
| H  | 3.02549200 | 5.68575700  | -2.14418700 |
| C  | 1.14447800 | 1.79897300  | 3.36022000  |
| C  | 1.20839800 | 2.78749700  | 4.53734800  |
| C  | 1.28532700 | 0.35487400  | 3.87004900  |
| H  | 0.15559800 | 1.88149400  | 2.90094100  |
| H  | 1.02601100 | 3.81462900  | 4.21146100  |
| H  | 0.46051500 | 2.53472600  | 5.29704300  |
| H  | 2.19612700 | 2.75813900  | 5.01098000  |
| H  | 1.34898100 | -0.33446000 | 3.02722100  |
| H  | 2.17488800 | 0.22946500  | 4.49715200  |
| H  | 0.41460000 | 0.08359800  | 4.47473900  |
| C  | 5.94098700 | 1.54223900  | 1.69639900  |
| C  | 6.14660900 | 0.36374500  | 2.65436000  |
| C  | 6.75974900 | 2.76032700  | 2.16402200  |
| H  | 6.31692600 | 1.24433400  | 0.71088100  |
| H  | 5.56463900 | -0.50962500 | 2.34375300  |
| H  | 7.20170300 | 0.07550200  | 2.67847000  |
| H  | 5.85453800 | 0.61583100  | 3.67945500  |
| H  | 6.65846200 | 3.59283800  | 1.46202000  |
| H  | 6.41118300 | 3.10488000  | 3.14421900  |
| H  | 7.82304200 | 2.50931500  | 2.24763100  |
| Ag | 2.40242400 | -0.49523500 | -1.50444000 |
| C  | 4.13809300 | -1.05706400 | -0.40637700 |
| C  | 5.54712700 | -0.96588300 | -0.88795800 |
| C  | 7.67151600 | -2.30656300 | -0.76738400 |
| O  | 6.05576900 | 0.00367700  | -1.45008600 |
| N  | 6.22643500 | -2.12978700 | -0.57349200 |
| C  | 5.49502300 | -2.94923500 | 0.37279100  |
| H  | 5.77458400 | -2.72317100 | 1.41301100  |
| H  | 5.68896100 | -4.01427500 | 0.20437800  |
| C  | 4.00916800 | -2.57707600 | 0.13183500  |
| C  | 3.36915400 | -3.38481600 | -0.96095900 |
| C  | 3.18653200 | -2.46654100 | 1.35447900  |
| C  | 2.05010000 | -3.71092300 | -0.88887000 |
| C  | 1.86268500 | -2.74357400 | 1.38753800  |
| H  | 3.66034200 | -2.01256600 | 2.22018900  |
| C  | 1.24678900 | -3.30959600 | 0.22218000  |

|   |             |             |             |
|---|-------------|-------------|-------------|
| H | 1.54097000  | -4.19870600 | -1.71246700 |
| H | 1.24692300  | -2.52495500 | 2.24958700  |
| H | 7.88106600  | -3.33441500 | -0.44547300 |
| C | 8.04229000  | -2.18663700 | -2.24898400 |
| H | 9.10776700  | -2.39569900 | -2.38612400 |
| H | 7.47057800  | -2.90193400 | -2.84803400 |
| H | 7.82743600  | -1.18013400 | -2.61008200 |
| C | 8.47925000  | -1.34571900 | 0.11423400  |
| H | 8.27185800  | -0.31406200 | -0.17768400 |
| H | 8.21805900  | -1.47011800 | 1.16946100  |
| H | 9.55173800  | -1.53473400 | 0.00428200  |
| O | -0.02705300 | -3.49571900 | 0.12326800  |
| H | -0.57984200 | -3.13773900 | 0.91538100  |
| C | 4.15269300  | -3.70742400 | -2.19491700 |
| H | 4.44469900  | -2.77856400 | -2.69660400 |
| H | 5.07777100  | -4.24287700 | -1.96225900 |
| H | 3.55791400  | -4.30643300 | -2.88706800 |
| H | 4.02983500  | -0.35849800 | 0.42936300  |
| C | -4.77052600 | -1.45570300 | 5.21744500  |
| C | -3.64439600 | -1.22555700 | 4.43169400  |
| C | -3.18131600 | -2.22624800 | 3.56823100  |
| C | -3.84768800 | -3.45554300 | 3.49627600  |
| C | -4.98153400 | -3.67654500 | 4.27344600  |
| C | -5.44298100 | -2.67752100 | 5.13451400  |
| H | -5.13081000 | -0.68063500 | 5.88650700  |
| H | -3.12630600 | -0.27453400 | 4.46418300  |
| H | -3.47562700 | -4.21440500 | 2.81900900  |
| H | -5.50631400 | -4.62462300 | 4.20829100  |
| H | -6.32776200 | -2.85061700 | 5.73993500  |
| C | -2.01441000 | -1.98742800 | 2.68309000  |
| O | -1.49931000 | -2.93076900 | 2.05572100  |
| O | -1.60369700 | -0.75074900 | 2.63651800  |
| H | -0.86231300 | -0.60132400 | 1.92314000  |

## TSD

|                                              |                             |
|----------------------------------------------|-----------------------------|
| Zero-point correction=                       | 1.330637 (Hartree/Particle) |
| Thermal correction to Energy=                | 1.396599                    |
| Thermal correction to Enthalpy=              | 1.397464                    |
| Thermal correction to Gibbs Free Energy=     | 1.234422                    |
| Sum of electronic and zero-point Energies=   | -3858.743446                |
| Sum of electronic and thermal Energies=      | -3858.677483                |
| Sum of electronic and thermal Enthalpies=    | -3858.676618                |
| Sum of electronic and thermal Free Energies= | -3858.839661                |

|   |             |             |             |
|---|-------------|-------------|-------------|
| C | -1.78685900 | 3.02472200  | -0.32896200 |
| C | -2.37771200 | 4.04561800  | 0.49138400  |
| C | -0.17053500 | 4.41569700  | 1.53562500  |
| C | 0.37996100  | 3.36690100  | 0.83176400  |
| C | -2.57794000 | 2.27658000  | -1.34653300 |
| C | -3.30873400 | 2.93895100  | -2.39142800 |
| C | -4.18565100 | 2.17054400  | -3.22552800 |
| C | -4.33324600 | 0.77642700  | -2.99548500 |
| C | -3.58100500 | 0.12305900  | -2.04665700 |
| H | 0.44987400  | 4.97809900  | 2.22574900  |
| H | -5.07132100 | 0.22225100  | -3.56742300 |
| C | 1.79334600  | 2.91459800  | 1.01508500  |
| C | 2.16881500  | 2.23866400  | 2.19542000  |
| C | 2.74643900  | 3.13144000  | -0.00501400 |
| C | 3.50654400  | 1.86036200  | 2.36247500  |
| C | 4.06004200  | 2.70403400  | 0.19453100  |
| C | 4.46971800  | 2.08740700  | 1.37965500  |
| H | 3.79239600  | 1.35992300  | 3.28034300  |
| H | 4.79220700  | 2.84519100  | -0.59499600 |
| C | -3.79329600 | -1.29497400 | -1.62047300 |
| C | -3.02512400 | -2.34763000 | -2.15959900 |
| C | -4.68802600 | -1.53202300 | -0.55728600 |
| C | -3.16047900 | -3.62315700 | -1.60945000 |
| C | -4.77691600 | -2.82522000 | -0.02985500 |
| C | -4.01591700 | -3.87880900 | -0.53307100 |
| H | -2.56650400 | -4.43467000 | -2.01390500 |
| H | -5.44453300 | -3.01263000 | 0.80678600  |
| C | -1.54081900 | 4.76339400  | 1.40779100  |
| C | -4.28573800 | 5.34687900  | 1.26071800  |
| C | -3.45081800 | 6.08597200  | 2.13053000  |
| C | -2.10892000 | 5.79331100  | 2.20333400  |
| C | -3.76413300 | 4.35359800  | 0.46252500  |
| H | -5.34956700 | 5.56107800  | 1.22535500  |
| H | -3.87395800 | 6.87182500  | 2.74861800  |
| H | -1.46012800 | 6.33686600  | 2.88463500  |
| H | -4.41553700 | 3.78980600  | -0.19309600 |
| C | -4.76440500 | 4.17641300  | -4.47463800 |
| C | -3.87624500 | 4.92917900  | -3.67206800 |
| C | -3.16857800 | 4.32710900  | -2.65592400 |
| C | -4.91083000 | 2.82630700  | -4.25448900 |
| H | -5.32039900 | 4.66426400  | -5.26928800 |
| H | -3.74689800 | 5.99020800  | -3.86235900 |
| H | -2.48398200 | 4.90975700  | -2.05154700 |



|   |             |             |             |
|---|-------------|-------------|-------------|
| H | -5.57958500 | 2.23439400  | -4.87323800 |
| C | -0.46294100 | 2.70288900  | -0.09685400 |
| C | -2.65748600 | 0.89622400  | -1.29404800 |
| O | -1.87095900 | 0.19001600  | -0.38746400 |
| O | 0.11881100  | 1.69971200  | -0.85586400 |
| P | -0.25555500 | 0.14554700  | -0.57180300 |
| O | 0.25747100  | -0.58693300 | -1.78419300 |
| O | 0.22357400  | -0.32003200 | 0.80824800  |
| C | -5.52539800 | -0.41382800 | 0.05334400  |
| C | -5.01264300 | -0.03383600 | 1.45168200  |
| C | -7.01976300 | -0.77074000 | 0.09193200  |
| H | -5.42447300 | 0.46793100  | -0.58355800 |
| H | -3.94452700 | 0.19912700  | 1.43409300  |
| H | -5.54879700 | 0.84131200  | 1.83548700  |
| H | -5.16444000 | -0.85490400 | 2.15733900  |
| H | -7.39060800 | -1.02808500 | -0.90508900 |
| H | -7.21413200 | -1.62281700 | 0.75155600  |
| H | -7.60406500 | 0.07624200  | 0.46745000  |
| C | -4.13996400 | -5.27489900 | 0.05328200  |
| C | -2.78182200 | -5.84861500 | 0.48905100  |
| C | -4.84786600 | -6.22128000 | -0.93195800 |
| H | -4.77305400 | -5.19363500 | 0.94746300  |
| H | -2.28447400 | -5.18859700 | 1.20287300  |
| H | -2.91150200 | -6.83411100 | 0.94993400  |
| H | -2.11050300 | -5.96839900 | -0.36733700 |
| H | -5.82976000 | -5.83103100 | -1.21647400 |
| H | -4.25765800 | -6.33790800 | -1.84730000 |
| H | -4.98495200 | -7.21488300 | -0.49117000 |
| C | -2.09439400 | -2.10058800 | -3.33843100 |
| C | -2.87669800 | -2.18956300 | -4.66158400 |
| C | -0.87798700 | -3.03548400 | -3.36263600 |
| H | -1.70737100 | -1.08220900 | -3.24408700 |
| H | -3.69298500 | -1.46258000 | -4.69269200 |
| H | -2.21701300 | -1.99561600 | -5.51447000 |
| H | -3.31082000 | -3.18805700 | -4.78570500 |
| H | -0.37894700 | -3.04116300 | -2.39260100 |
| H | -1.15918800 | -4.06223100 | -3.62472300 |
| H | -0.16181800 | -2.68892100 | -4.11435900 |
| C | 2.39815300  | 3.84414500  | -1.30506000 |
| C | 2.68278900  | 2.96743000  | -2.53563800 |
| C | 3.13585400  | 5.19154600  | -1.39875800 |
| H | 1.32771600  | 4.06481500  | -1.30099500 |
| H | 2.10369500  | 2.04057100  | -2.48753700 |
| H | 2.40199600  | 3.49456100  | -3.45408600 |

|    |            |             |             |
|----|------------|-------------|-------------|
| H  | 3.74239800 | 2.70398500  | -2.60758600 |
| H  | 2.90455100 | 5.82565400  | -0.53701700 |
| H  | 4.22083400 | 5.04626600  | -1.42565000 |
| H  | 2.84574200 | 5.72861800  | -2.30823700 |
| C  | 1.16184400 | 1.89054700  | 3.28596600  |
| C  | 1.21319100 | 2.90152200  | 4.44472200  |
| C  | 1.35774300 | 0.46259200  | 3.82327500  |
| H  | 0.16294600 | 1.93295400  | 2.84263800  |
| H  | 0.99324700 | 3.91695600  | 4.10600500  |
| H  | 0.48680000 | 2.63826700  | 5.22158800  |
| H  | 2.20913100 | 2.91110300  | 4.90137100  |
| H  | 1.44941900 | -0.24461500 | 2.99817300  |
| H  | 2.25348100 | 0.38417100  | 4.44900700  |
| H  | 0.50004000 | 0.17031600  | 4.43653500  |
| C  | 5.93731300 | 1.72915700  | 1.55568700  |
| C  | 6.18953400 | 0.59802000  | 2.55861300  |
| C  | 6.73922800 | 2.98343200  | 1.95171500  |
| H  | 6.29718200 | 1.39484700  | 0.57593600  |
| H  | 5.61967400 | -0.29990900 | 2.30024200  |
| H  | 7.25073100 | 0.33275100  | 2.56759900  |
| H  | 5.91737500 | 0.88932100  | 3.57904600  |
| H  | 6.60580600 | 3.78292100  | 1.21732700  |
| H  | 6.40551400 | 3.36320200  | 2.92415400  |
| H  | 7.80903700 | 2.75755500  | 2.02152300  |
| Ag | 2.49482400 | -0.52388000 | -1.51466300 |
| C  | 4.20548900 | -1.03728500 | -0.35724300 |
| C  | 5.61250300 | -0.95722300 | -0.84390200 |
| C  | 7.73035800 | -2.30262200 | -0.67823400 |
| O  | 6.13137300 | -0.00766200 | -1.43248300 |
| N  | 6.28577200 | -2.11637800 | -0.49646800 |
| C  | 5.54870100 | -2.90578000 | 0.47227100  |
| H  | 5.83586000 | -2.65539100 | 1.50529200  |
| H  | 5.73267400 | -3.97657400 | 0.33114100  |
| C  | 4.06564600 | -2.52125300 | 0.22385700  |
| C  | 3.41519000 | -3.37672500 | -0.83626200 |
| C  | 3.25437200 | -2.40081400 | 1.46170200  |
| C  | 2.10573500 | -3.71458600 | -0.73836200 |
| C  | 1.94420900 | -2.70916700 | 1.52721600  |
| H  | 3.73781600 | -1.92160600 | 2.30911400  |
| C  | 1.28911200 | -3.29668700 | 0.37533900  |
| H  | 1.59586000 | -4.23631900 | -1.54106200 |
| H  | 1.34863000 | -2.49597600 | 2.40666600  |
| H  | 7.93603800 | -3.32121800 | -0.32574000 |
| C  | 8.10921800 | -2.22668500 | -2.16075600 |

|   |             |             |             |
|---|-------------|-------------|-------------|
| H | 9.17475600  | -2.44290900 | -2.28698300 |
| H | 7.53747400  | -2.95716300 | -2.74115000 |
| H | 7.89845300  | -1.23033700 | -2.55119900 |
| C | 8.53649200  | -1.31852200 | 0.17936700  |
| H | 8.33016900  | -0.29555800 | -0.14243700 |
| H | 8.27072300  | -1.41328000 | 1.23672000  |
| H | 9.60939900  | -1.51123100 | 0.07930300  |
| O | 0.03503400  | -3.46209700 | 0.30718700  |
| H | -0.71780400 | -3.08548200 | 1.22557200  |
| C | 4.19480200  | -3.73443400 | -2.06572500 |
| H | 4.49957900  | -2.82360800 | -2.59156700 |
| H | 5.11230600  | -4.27841400 | -1.82162500 |
| H | 3.59188600  | -4.34357800 | -2.74220900 |
| H | 4.08785000  | -0.30386000 | 0.44625200  |
| C | -4.53519600 | -1.07359600 | 5.20815200  |
| C | -3.41517000 | -0.98066300 | 4.38724200  |
| C | -3.06980900 | -2.05328600 | 3.55581000  |
| C | -3.84785100 | -3.21781800 | 3.54877200  |
| C | -4.97535400 | -3.30084700 | 4.36167900  |
| C | -5.31889200 | -2.23036300 | 5.19138200  |
| H | -4.80472500 | -0.24282400 | 5.85250800  |
| H | -2.80964400 | -0.08224300 | 4.36408100  |
| H | -3.57016900 | -4.03348900 | 2.89283000  |
| H | -5.58722000 | -4.19739300 | 4.34801100  |
| H | -6.19912700 | -2.29682100 | 5.82386600  |
| C | -1.91297500 | -1.93128300 | 2.63689200  |
| O | -1.53832400 | -2.99555800 | 2.04212300  |
| O | -1.38031100 | -0.78547200 | 2.51406500  |
| H | -0.57547500 | -0.58315000 | 1.65157400  |

## CPG

|                                              |             |            |                             |
|----------------------------------------------|-------------|------------|-----------------------------|
| Zero-point correction=                       |             |            | 1.337625 (Hartree/Particle) |
| Thermal correction to Energy=                |             |            | 1.404831                    |
| Thermal correction to Enthalpy=              |             |            | 1.405696                    |
| Thermal correction to Gibbs Free Energy=     |             |            | 1.240147                    |
| Sum of electronic and zero-point Energies=   |             |            | -3858.740449                |
| Sum of electronic and thermal Energies=      |             |            | -3858.673242                |
| Sum of electronic and thermal Enthalpies=    |             |            | -3858.672377                |
| Sum of electronic and thermal Free Energies= |             |            | -3858.837926                |
| C                                            | -1.74714900 | 3.01884600 | -0.37802600                 |
| C                                            | -2.33715300 | 4.03862000 | 0.44350700                  |
| C                                            | -0.12121300 | 4.42649000 | 1.46226900                  |

|   |             |             |             |
|---|-------------|-------------|-------------|
| C | 0.43016400  | 3.37675500  | 0.75938200  |
| C | -2.54621000 | 2.25739600  | -1.37890500 |
| C | -3.28575700 | 2.90923000  | -2.42360600 |
| C | -4.17010800 | 2.13232200  | -3.24121300 |
| C | -4.32460300 | 0.74410800  | -2.98517800 |
| C | -3.57203800 | 0.09994200  | -2.02910100 |
| H | 0.50190200  | 4.99344800  | 2.14590400  |
| H | -5.07344600 | 0.18498100  | -3.53800600 |
| C | 1.84231000  | 2.92360700  | 0.94769100  |
| C | 2.21518200  | 2.26857000  | 2.14122000  |
| C | 2.79642500  | 3.11920200  | -0.07574200 |
| C | 3.55174300  | 1.89043800  | 2.31562000  |
| C | 4.10865900  | 2.69206900  | 0.13280900  |
| C | 4.51614500  | 2.09678400  | 1.32953800  |
| H | 3.83530500  | 1.40422100  | 3.24167300  |
| H | 4.84182300  | 2.81678500  | -0.65850100 |
| C | -3.82654700 | -1.29986600 | -1.56820300 |
| C | -3.07891000 | -2.38733600 | -2.06256600 |
| C | -4.77060200 | -1.48568200 | -0.53590200 |
| C | -3.28361600 | -3.64937700 | -1.50206100 |
| C | -4.92938800 | -2.76741600 | 0.00132300  |
| C | -4.19215300 | -3.85721600 | -0.46045000 |
| H | -2.70686200 | -4.48800400 | -1.87463200 |
| H | -5.63750100 | -2.91988400 | 0.81045500  |
| C | -1.49435000 | 4.76636200  | 1.34630400  |
| C | -4.24557000 | 5.32830400  | 1.22848500  |
| C | -3.40572500 | 6.07776400  | 2.08478400  |
| C | -2.06083900 | 5.79609300  | 2.14343300  |
| C | -3.72615300 | 4.33533600  | 0.42856100  |
| H | -5.31125100 | 5.53452000  | 1.20502500  |
| H | -3.82764400 | 6.86321900  | 2.70413900  |
| H | -1.40855900 | 6.34772300  | 2.81472000  |
| H | -4.38069300 | 3.76342300  | -0.21686400 |
| C | -4.75239800 | 4.12318600  | -4.51148800 |
| C | -3.85890900 | 4.88469900  | -3.72290800 |
| C | -3.14568800 | 4.29422200  | -2.70399100 |
| C | -4.90027500 | 2.77625100  | -4.27422000 |
| H | -5.31220600 | 4.60241700  | -5.30864200 |
| H | -3.73002800 | 5.94325200  | -3.92652700 |
| H | -2.45675800 | 4.88307700  | -2.11063300 |
| H | -5.57446200 | 2.17825400  | -4.88096200 |
| C | -0.41898700 | 2.71010900  | -0.16013700 |
| C | -2.63096400 | 0.87840200  | -1.30678400 |
| O | -1.81891600 | 0.18027000  | -0.40566100 |

|   |             |             |             |
|---|-------------|-------------|-------------|
| O | 0.15787200  | 1.70343400  | -0.92715000 |
| P | -0.21517900 | 0.16151000  | -0.63318600 |
| O | 0.30731900  | -0.61010500 | -1.80851500 |
| O | 0.31162100  | -0.25168100 | 0.76850500  |
| C | -5.57662700 | -0.32012200 | 0.02878800  |
| C | -4.97664500 | 0.17887900  | 1.35448700  |
| C | -7.06514000 | -0.65857900 | 0.20076500  |
| H | -5.51871500 | 0.50247400  | -0.68792800 |
| H | -3.90527600 | 0.37721300  | 1.26359300  |
| H | -5.46926500 | 1.10224200  | 1.67922800  |
| H | -5.11138300 | -0.56834900 | 2.13998700  |
| H | -7.49984100 | -1.02802500 | -0.73312800 |
| H | -7.22159800 | -1.42163800 | 0.97014100  |
| H | -7.62144000 | 0.23294300  | 0.50927900  |
| C | -4.40891500 | -5.24168600 | 0.12680100  |
| C | -3.09714400 | -5.90687100 | 0.57303900  |
| C | -5.17133800 | -6.13759100 | -0.86549000 |
| H | -5.04316400 | -5.11898900 | 1.01557100  |
| H | -2.55714500 | -5.27864900 | 1.28434900  |
| H | -3.29974300 | -6.87664800 | 1.04055200  |
| H | -2.43315200 | -6.08358900 | -0.27922000 |
| H | -6.12332800 | -5.68286200 | -1.15593300 |
| H | -4.58296500 | -6.29020100 | -1.77673000 |
| H | -5.37666000 | -7.12085000 | -0.42809100 |
| C | -2.10136200 | -2.19512900 | -3.21278400 |
| C | -2.84036600 | -2.29418800 | -4.55991000 |
| C | -0.91199400 | -3.16392300 | -3.16973600 |
| H | -1.69003900 | -1.18536100 | -3.13235000 |
| H | -3.63289100 | -1.54426200 | -4.63653200 |
| H | -2.14613300 | -2.14082400 | -5.39335000 |
| H | -3.29972600 | -3.28230800 | -4.67529900 |
| H | -0.45743000 | -3.17769600 | -2.17775700 |
| H | -1.21212800 | -4.18511500 | -3.43260500 |
| H | -0.15291600 | -2.84788900 | -3.89196400 |
| C | 2.45183700  | 3.81089700  | -1.38806300 |
| C | 2.74306800  | 2.91599900  | -2.60389900 |
| C | 3.18780000  | 5.15794800  | -1.49956100 |
| H | 1.38103200  | 4.03048600  | -1.39179500 |
| H | 2.17141200  | 1.98547900  | -2.54179100 |
| H | 2.46018000  | 3.42643500  | -3.53106100 |
| H | 3.80434400  | 2.65826800  | -2.67048800 |
| H | 2.95152000  | 5.80517300  | -0.64899900 |
| H | 4.27301100  | 5.01360400  | -1.51870500 |
| H | 2.90144700  | 5.68018200  | -2.41882400 |

|    |            |             |             |
|----|------------|-------------|-------------|
| C  | 1.20770900 | 1.93785500  | 3.23717300  |
| C  | 1.25911400 | 2.96549700  | 4.38140300  |
| C  | 1.40338900 | 0.51880600  | 3.79878900  |
| H  | 0.20850400 | 1.97359800  | 2.79364200  |
| H  | 1.03839700 | 3.97644000  | 4.03013600  |
| H  | 0.53396200 | 2.71197400  | 5.16261500  |
| H  | 2.25550000 | 2.98155300  | 4.83672100  |
| H  | 1.51338300 | -0.20422300 | 2.99001600  |
| H  | 2.29009100 | 0.45634900  | 4.43901400  |
| H  | 0.53812500 | 0.22988700  | 4.40259900  |
| C  | 5.98206200 | 1.73577000  | 1.51232300  |
| C  | 6.23058300 | 0.63348700  | 2.54765600  |
| C  | 6.79168500 | 2.99695900  | 1.86899100  |
| H  | 6.33700900 | 1.37046700  | 0.54193300  |
| H  | 5.65449800 | -0.26826100 | 2.31829200  |
| H  | 7.29013400 | 0.36227000  | 2.56042600  |
| H  | 5.96429300 | 0.95707900  | 3.55998000  |
| H  | 6.66093300 | 3.77552900  | 1.11193600  |
| H  | 6.46338600 | 3.40695100  | 2.83098800  |
| H  | 7.86031300 | 2.76688600  | 1.94217100  |
| Ag | 2.56173300 | -0.59543700 | -1.51347400 |
| C  | 4.24835900 | -1.08530500 | -0.31444100 |
| C  | 5.65903500 | -1.02078400 | -0.79301100 |
| C  | 7.76530100 | -2.37716600 | -0.57723500 |
| O  | 6.19049900 | -0.09025000 | -1.40184400 |
| N  | 6.32209800 | -2.17348700 | -0.40804500 |
| C  | 5.56833900 | -2.93797400 | 0.56915100  |
| H  | 5.84748900 | -2.66756800 | 1.59939600  |
| H  | 5.74664600 | -4.01264500 | 0.45251900  |
| C  | 4.09078600 | -2.54677000 | 0.29504600  |
| C  | 3.44883200 | -3.43368400 | -0.75011900 |
| C  | 3.26772500 | -2.40689600 | 1.52813400  |
| C  | 2.14410600 | -3.77882400 | -0.65230000 |
| C  | 1.96303300 | -2.72755700 | 1.59477800  |
| H  | 3.74493900 | -1.90570400 | 2.36692000  |
| C  | 1.30358700 | -3.34471500 | 0.44960500  |
| H  | 1.64655000 | -4.32804100 | -1.44495900 |
| H  | 1.35966700 | -2.50251200 | 2.46737400  |
| H  | 7.96060500 | -3.38710500 | -0.19524200 |
| C  | 8.15227800 | -2.34611100 | -2.05941100 |
| H  | 9.21663300 | -2.57447500 | -2.17434100 |
| H  | 7.57706700 | -3.08779200 | -2.62185700 |
| H  | 7.95142100 | -1.35933400 | -2.47843000 |
| C  | 8.57630400 | -1.37645800 | 0.25630000  |

|   |             |             |             |
|---|-------------|-------------|-------------|
| H | 8.37846000  | -0.36116000 | -0.09388500 |
| H | 8.30603400  | -1.44087600 | 1.31478900  |
| H | 9.64813600  | -1.57975900 | 0.16532600  |
| O | 0.06226500  | -3.50708800 | 0.38800300  |
| H | -0.96183000 | -3.11894200 | 1.36965700  |
| C | 4.24240200  | -3.81718500 | -1.96465900 |
| H | 4.55695400  | -2.91975800 | -2.50737500 |
| H | 5.15476800  | -4.36059700 | -1.70021700 |
| H | 3.64491900  | -4.43897300 | -2.63474900 |
| H | 4.12584200  | -0.33019100 | 0.46797700  |
| C | -4.54843800 | -0.76899800 | 5.12168700  |
| C | -3.40820200 | -0.82322300 | 4.32577900  |
| C | -3.17811100 | -1.93879700 | 3.51157000  |
| C | -4.09053200 | -3.00134600 | 3.49819000  |
| C | -5.23641800 | -2.93731900 | 4.28720000  |
| C | -5.46593100 | -1.82281400 | 5.09804800  |
| H | -4.72931500 | 0.09630500  | 5.75142700  |
| H | -2.69554900 | -0.00681900 | 4.30560200  |
| H | -3.90199000 | -3.85346900 | 2.85752400  |
| H | -5.95119300 | -3.75415900 | 4.26963900  |
| H | -6.36113000 | -1.77486600 | 5.71090400  |
| C | -1.99108500 | -1.94855900 | 2.62379800  |
| O | -1.78298800 | -3.07234200 | 2.00189700  |
| O | -1.27817600 | -0.93074600 | 2.52287200  |
| H | -0.37211500 | -0.58181500 | 1.48679900  |

## TSE

|                                              |                             |
|----------------------------------------------|-----------------------------|
| Zero-point correction=                       | 1.337391 (Hartree/Particle) |
| Thermal correction to Energy=                | 1.403405                    |
| Thermal correction to Enthalpy=              | 1.404270                    |
| Thermal correction to Gibbs Free Energy=     | 1.242766                    |
| Sum of electronic and zero-point Energies=   | -3858.717853                |
| Sum of electronic and thermal Energies=      | -3858.651839                |
| Sum of electronic and thermal Enthalpies=    | -3858.650974                |
| Sum of electronic and thermal Free Energies= | -3858.812478                |

|   |            |             |             |
|---|------------|-------------|-------------|
| C | 2.67455700 | -1.35572400 | -1.14902000 |
| C | 3.59028300 | -2.37685800 | -0.72564600 |
| C | 1.74826200 | -4.01306200 | -0.82001400 |
| C | 0.83919000 | -3.01364300 | -1.08715100 |
| C | 3.10201900 | 0.04046700  | -1.42317700 |
| C | 4.17920100 | 0.31795000  | -2.33415400 |
| C | 4.62672300 | 1.66774800  | -2.49347100 |

|   |             |             |             |
|---|-------------|-------------|-------------|
| C | 3.97867900  | 2.70281900  | -1.77745800 |
| C | 2.88666400  | 2.46160500  | -0.97287400 |
| H | 1.40252800  | -5.03386000 | -0.69392900 |
| H | 4.34417100  | 3.71937200  | -1.88013200 |
| C | -0.63634500 | -3.23055400 | -1.07936600 |
| C | -1.28124000 | -3.54113000 | 0.14150300  |
| C | -1.39761400 | -3.04712100 | -2.25548700 |
| C | -2.66808400 | -3.73606000 | 0.14527200  |
| C | -2.80132400 | -3.19242200 | -2.18983200 |
| C | -3.45150700 | -3.57096400 | -0.99695400 |
| H | -3.15204100 | -4.00357900 | 1.07811600  |
| H | -3.38410400 | -3.14271100 | -3.10646600 |
| C | 2.18838700  | 3.56732300  | -0.24821200 |
| C | 1.24398400  | 4.35827300  | -0.93676000 |
| C | 2.48508100  | 3.81270700  | 1.11214300  |
| C | 0.59571800  | 5.38454100  | -0.24224700 |
| C | 1.80990100  | 4.85365900  | 1.75673800  |
| C | 0.85957100  | 5.64147000  | 1.10460400  |
| H | -0.13249000 | 5.99527400  | -0.76616900 |
| H | 2.01056000  | 5.04713100  | 2.80440500  |
| C | 3.12588600  | -3.72909100 | -0.63772900 |
| C | 5.79508300  | -3.11882100 | -0.01352100 |
| C | 5.35578500  | -4.46395900 | -0.00404900 |
| C | 4.04518400  | -4.75773700 | -0.30047100 |
| C | 4.93604100  | -2.10241900 | -0.36664700 |
| H | 6.81739800  | -2.88546400 | 0.26683400  |
| H | 6.04839200  | -5.25682700 | 0.26120100  |
| H | 3.68245900  | -5.78078500 | -0.25565800 |
| H | 5.27709900  | -1.07530700 | -0.35973200 |
| C | 6.29140000  | 0.94874900  | -4.11342700 |
| C | 5.81927100  | -0.37944700 | -3.99570500 |
| C | 4.79280200  | -0.68677900 | -3.13169900 |
| C | 5.69947800  | 1.94965200  | -3.38026800 |
| H | 7.10733300  | 1.17543300  | -4.79272600 |
| H | 6.26620700  | -1.16437800 | -4.59827200 |
| H | 4.43549400  | -1.70615800 | -3.06429500 |
| H | 6.03326000  | 2.97915800  | -3.47583500 |
| C | 1.34894100  | -1.70564400 | -1.29677200 |
| C | 2.44616200  | 1.11871100  | -0.84331600 |
| O | 1.31525900  | 0.91576100  | -0.05150200 |
| O | 0.44783500  | -0.74779500 | -1.73547700 |
| P | -0.06736600 | 0.42280200  | -0.72613000 |
| O | -0.88647100 | 1.36187000  | -1.53638300 |
| O | -0.78765500 | -0.25947100 | 0.49008400  |



|   |             |             |             |
|---|-------------|-------------|-------------|
| C | 3.53597900  | 2.98835900  | 1.85444900  |
| C | 3.44596500  | 3.08861300  | 3.38335500  |
| C | 4.96111200  | 3.39176600  | 1.42321600  |
| H | 3.37420500  | 1.93599400  | 1.59407100  |
| H | 2.43642200  | 2.88560500  | 3.73732800  |
| H | 4.12219000  | 2.35445000  | 3.83255700  |
| H | 3.75869000  | 4.07749200  | 3.73949900  |
| H | 5.13481100  | 3.24292000  | 0.35712100  |
| H | 5.13946500  | 4.44842700  | 1.65303100  |
| H | 5.70152800  | 2.79840200  | 1.97045700  |
| C | 0.11579100  | 6.73361700  | 1.85466200  |
| C | -1.38930900 | 6.42617800  | 1.94318500  |
| C | 0.36027000  | 8.11942500  | 1.23572700  |
| H | 0.51211200  | 6.74999700  | 2.87792300  |
| H | -1.56490400 | 5.44605600  | 2.39618700  |
| H | -1.90689700 | 7.18367800  | 2.54201600  |
| H | -1.84555100 | 6.41887600  | 0.94732400  |
| H | 1.42927400  | 8.34921900  | 1.19643800  |
| H | -0.02890100 | 8.16791300  | 0.21305500  |
| H | -0.13889600 | 8.90053800  | 1.81942100  |
| C | 0.97507500  | 4.16336600  | -2.42556900 |
| C | 1.82662800  | 5.15184700  | -3.24448600 |
| C | -0.50513400 | 4.28972400  | -2.81122500 |
| H | 1.28623800  | 3.14931300  | -2.69178400 |
| H | 2.89354400  | 5.03506100  | -3.03703900 |
| H | 1.66971600  | 5.00082800  | -4.31809300 |
| H | 1.55237300  | 6.18479800  | -3.00273300 |
| H | -1.10622500 | 3.56577500  | -2.26243200 |
| H | -0.89289800 | 5.29831600  | -2.63059000 |
| H | -0.62336400 | 4.08658600  | -3.88109900 |
| C | -0.74977900 | -2.78759200 | -3.60830400 |
| C | -1.33799100 | -1.56116300 | -4.32402400 |
| C | -0.84494100 | -4.04853500 | -4.48770400 |
| H | 0.31013900  | -2.58955900 | -3.44074400 |
| H | -1.23271800 | -0.66353700 | -3.70541900 |
| H | -0.80717800 | -1.37751400 | -5.26373000 |
| H | -2.39582000 | -1.70409600 | -4.57133300 |
| H | -0.39052100 | -4.90962200 | -3.98830700 |
| H | -1.88775400 | -4.29955300 | -4.71011600 |
| H | -0.32619500 | -3.89155200 | -5.43878800 |
| C | -0.52448600 | -3.63641300 | 1.46127000  |
| C | -0.32382400 | -5.10108000 | 1.88734000  |
| C | -1.21025800 | -2.83683700 | 2.58065400  |
| H | 0.46278000  | -3.19386400 | 1.31677200  |

|    |             |             |             |
|----|-------------|-------------|-------------|
| H  | 0.20748000  | -5.67531300 | 1.12298200  |
| H  | 0.25855800  | -5.14787700 | 2.81146300  |
| H  | -1.28855600 | -5.59173000 | 2.06121500  |
| H  | -1.35404600 | -1.79882300 | 2.28213400  |
| H  | -2.18103600 | -3.26417700 | 2.85586500  |
| H  | -0.58084000 | -2.84757700 | 3.47356900  |
| C  | -4.94422000 | -3.85209800 | -0.98708400 |
| C  | -5.69287100 | -3.06166200 | 0.09723600  |
| C  | -5.19300700 | -5.36511800 | -0.84615400 |
| H  | -5.34008100 | -3.53424600 | -1.96011300 |
| H  | -5.59115400 | -1.98703700 | -0.06798400 |
| H  | -6.75878900 | -3.31141200 | 0.07639700  |
| H  | -5.31721400 | -3.30365800 | 1.09724300  |
| H  | -4.68341700 | -5.92719200 | -1.63484200 |
| H  | -4.82287700 | -5.73063100 | 0.11769000  |
| H  | -6.26375500 | -5.58638400 | -0.90253700 |
| Ag | -2.95255100 | -0.75906200 | -1.54139200 |
| C  | -3.49240700 | 0.23873200  | 0.71883100  |
| C  | -4.73770100 | 0.66922600  | 0.02920800  |
| C  | -6.64841400 | 2.26571500  | 0.34325900  |
| O  | -5.17384000 | 0.17878000  | -1.04198200 |
| N  | -5.35643100 | 1.66806500  | 0.71050000  |
| C  | -4.71878300 | 1.92260100  | 1.99580000  |
| H  | -5.24414600 | 1.39752800  | 2.80672900  |
| H  | -4.72657000 | 2.99204100  | 2.22878900  |
| C  | -3.27523800 | 1.36258300  | 1.82108900  |
| C  | -2.33839600 | 2.43444800  | 1.29258400  |
| C  | -2.77567300 | 0.69773300  | 3.06039900  |
| C  | -1.08945500 | 2.56773200  | 1.78542500  |
| C  | -1.51478700 | 0.80263500  | 3.50319100  |
| H  | -3.47420700 | 0.02215900  | 3.55050500  |
| C  | -0.56835800 | 1.69958700  | 2.83157800  |
| H  | -0.39139700 | 3.28110700  | 1.36439700  |
| H  | -1.14506800 | 0.22598200  | 4.34410100  |
| H  | -6.82401700 | 3.04702700  | 1.09169300  |
| C  | -6.58006900 | 2.92768500  | -1.03691800 |
| H  | -7.52831000 | 3.42765600  | -1.25714200 |
| H  | -5.78051000 | 3.67284400  | -1.07047500 |
| H  | -6.38904500 | 2.17799300  | -1.80639000 |
| C  | -7.77668300 | 1.23181800  | 0.44049600  |
| H  | -7.61064600 | 0.43357100  | -0.28640700 |
| H  | -7.81648800 | 0.79085300  | 1.44160200  |
| H  | -8.74369600 | 1.70109500  | 0.23451000  |
| O  | 0.63433700  | 1.73023400  | 3.14652200  |

|   |             |             |             |
|---|-------------|-------------|-------------|
| H | 1.25000800  | 0.35726700  | 3.71553500  |
| C | -2.78524000 | 3.28500000  | 0.14129500  |
| H | -2.97036000 | 2.66088200  | -0.73749600 |
| H | -3.70808100 | 3.82932800  | 0.36728900  |
| H | -2.00720300 | 4.00255600  | -0.11798200 |
| H | -3.71042200 | -0.71779700 | 1.21336600  |
| C | 3.41290200  | -4.81901000 | 3.16970800  |
| C | 3.21713800  | -3.48305000 | 2.82825900  |
| C | 2.40341800  | -2.66814500 | 3.62178200  |
| C | 1.79681600  | -3.19676900 | 4.76880500  |
| C | 1.99388500  | -4.53423000 | 5.10878000  |
| C | 2.80020100  | -5.34753200 | 4.30820100  |
| H | 4.04387900  | -5.44295700 | 2.54579300  |
| H | 3.68797000  | -3.04992800 | 1.95613200  |
| H | 1.17763600  | -2.55279800 | 5.38195300  |
| H | 1.52089300  | -4.94226700 | 5.99710200  |
| H | 2.95229800  | -6.38985300 | 4.57363400  |
| C | 2.19795200  | -1.24591800 | 3.20468200  |
| O | 1.44263200  | -0.56396500 | 4.06782600  |
| O | 2.67566600  | -0.77846300 | 2.18282400  |
| H | -1.83089400 | -0.07952900 | 0.44292200  |

**(R)-2a**

|                                              |                             |
|----------------------------------------------|-----------------------------|
| Zero-point correction=                       | 0.280591 (Hartree/Particle) |
| Thermal correction to Energy=                | 0.293097                    |
| Thermal correction to Enthalpy=              | 0.293962                    |
| Thermal correction to Gibbs Free Energy=     | 0.244557                    |
| Sum of electronic and zero-point Energies=   | -710.531968                 |
| Sum of electronic and thermal Energies=      | -710.519462                 |
| Sum of electronic and thermal Enthalpies=    | -710.518597                 |
| Sum of electronic and thermal Free Energies= | -710.568002                 |

|   |             |             |             |
|---|-------------|-------------|-------------|
| C | -0.10129700 | -0.83049000 | 1.17352500  |
| C | 1.32249700  | -0.35663000 | 1.04987800  |
| C | 2.97777300  | 0.03451900  | -0.78557000 |
| O | 2.10122900  | -0.12465100 | 1.99677500  |
| N | 1.63525200  | -0.27008200 | -0.25872900 |
| C | 0.50370100  | -0.59205500 | -1.13366200 |
| H | 0.60231700  | -1.60926300 | -1.53584000 |
| H | 0.46457100  | 0.10283100  | -1.97681300 |
| C | -0.74041500 | -0.47748500 | -0.20808600 |
| C | -1.28151200 | 0.94495900  | -0.14222100 |
| C | -1.79397700 | -1.50908700 | -0.47321100 |

|   |             |             |             |
|---|-------------|-------------|-------------|
| C | -2.60710700 | 1.16707800  | -0.04361100 |
| C | -3.10265600 | -1.27033900 | -0.32480800 |
| H | -1.43669800 | -2.51610800 | -0.68166900 |
| C | -3.58788600 | 0.08890600  | -0.04085500 |
| H | -2.99883200 | 2.17065800  | 0.08347800  |
| H | -3.85019800 | -2.05156500 | -0.41431700 |
| H | 2.86397000  | 0.01778800  | -1.87489700 |
| C | 3.43566600  | 1.43489400  | -0.36437400 |
| H | 4.40532700  | 1.65795900  | -0.81927500 |
| H | 2.72040700  | 2.19537700  | -0.68700500 |
| H | 3.53557800  | 1.49191900  | 0.72096600  |
| C | 3.97564600  | -1.05622200 | -0.38153500 |
| H | 4.09992000  | -1.07085700 | 0.70346900  |
| H | 3.63012400  | -2.04191500 | -0.70787200 |
| H | 4.94915700  | -0.86391000 | -0.84192800 |
| O | -4.79189900 | 0.31113300  | 0.15268000  |
| C | -0.32148600 | 2.09571600  | -0.07852600 |
| H | 0.27491900  | 2.05213800  | 0.83577000  |
| H | 0.35825100  | 2.10942000  | -0.93736900 |
| H | -0.87121400 | 3.03566900  | -0.05508400 |
| H | -0.07261200 | -1.91755200 | 1.32014400  |
| H | -0.67007500 | -0.40645000 | 2.00204600  |

## CPN

|                                              |                             |
|----------------------------------------------|-----------------------------|
| Zero-point correction=                       | 1.221430 (Hartree/Particle) |
| Thermal correction to Energy=                | 1.282552                    |
| Thermal correction to Enthalpy=              | 1.283417                    |
| Thermal correction to Gibbs Free Energy=     | 1.130407                    |
| Sum of electronic and zero-point Energies=   | -3437.976549                |
| Sum of electronic and thermal Energies=      | -3437.915428                |
| Sum of electronic and thermal Enthalpies=    | -3437.914563                |
| Sum of electronic and thermal Free Energies= | -3438.067573                |

|   |             |             |             |
|---|-------------|-------------|-------------|
| C | -3.45637400 | 1.70621000  | 0.19854300  |
| C | -4.81207500 | 1.93898800  | -0.21499400 |
| C | -5.25870900 | -0.47053400 | 0.03966600  |
| C | -3.93026400 | -0.72046700 | 0.30531000  |
| C | -2.47420900 | 2.80713100  | 0.38667400  |
| C | -2.75451900 | 3.93159800  | 1.23746500  |
| C | -1.79710400 | 4.99357900  | 1.32284800  |
| C | -0.54947800 | 4.86007400  | 0.66529300  |
| C | -0.21827100 | 3.72389400  | -0.04112600 |
| H | -5.95909300 | -1.29826500 | -0.01352500 |

|    |             |             |             |
|----|-------------|-------------|-------------|
| H  | 0.19137800  | 5.64564100  | 0.78147200  |
| C  | -3.36833500 | -2.10027200 | 0.39148800  |
| C  | -3.35244300 | -2.91837100 | -0.76282100 |
| C  | -2.77225700 | -2.56261800 | 1.58647500  |
| C  | -2.73608900 | -4.17932700 | -0.69316300 |
| C  | -2.17137600 | -3.82325500 | 1.60519300  |
| C  | -2.13581400 | -4.65072600 | 0.47991700  |
| H  | -2.74214700 | -4.80719900 | -1.57644600 |
| H  | -1.71378900 | -4.17541100 | 2.52591100  |
| C  | 1.18053800  | 3.48320800  | -0.50158700 |
| C  | 2.18572700  | 3.29714300  | 0.47252200  |
| C  | 1.50895000  | 3.43125900  | -1.87280400 |
| C  | 3.50690600  | 3.12074700  | 0.04824600  |
| C  | 2.83753400  | 3.21345300  | -2.24435500 |
| C  | 3.85684700  | 3.06562300  | -1.29994200 |
| H  | 4.29003900  | 3.02696800  | 0.79564200  |
| H  | 3.08454900  | 3.17489200  | -3.30132200 |
| C  | -5.72756600 | 0.83754200  | -0.24377500 |
| C  | -6.59585400 | 3.39774000  | -1.00316300 |
| C  | -7.51081700 | 2.31928600  | -0.97934500 |
| C  | -7.07968500 | 1.06577200  | -0.61315400 |
| C  | -5.28304100 | 3.21294100  | -0.63201700 |
| H  | -6.93044100 | 4.37980800  | -1.32332400 |
| H  | -8.54519700 | 2.48049900  | -1.26709500 |
| H  | -7.76383800 | 0.22150600  | -0.61812100 |
| H  | -4.59021200 | 4.04444900  | -0.66180400 |
| C  | -3.24750200 | 6.20699100  | 2.85300200  |
| C  | -4.16816200 | 5.13383500  | 2.81744800  |
| C  | -3.92800900 | 4.02731400  | 2.03424500  |
| C  | -2.08330200 | 6.12977100  | 2.12556000  |
| H  | -3.45322100 | 7.07746800  | 3.46842000  |
| H  | -5.07089200 | 5.17938700  | 3.41919200  |
| H  | -4.63810200 | 3.21057600  | 2.02688000  |
| H  | -1.34976100 | 6.93040500  | 2.16678500  |
| C  | -3.05468000 | 0.39665400  | 0.41006100  |
| C  | -1.22102500 | 2.72980200  | -0.20697000 |
| O  | -0.91852300 | 1.67095300  | -1.04156100 |
| O  | -1.74471000 | 0.14177500  | 0.76737900  |
| P  | -0.60529000 | 0.17558500  | -0.43255600 |
| O  | 0.72759200  | 0.03811500  | 0.22871800  |
| O  | -1.02911400 | -0.76144600 | -1.55863800 |
| Ag | -0.26489700 | -2.78073500 | -1.26127800 |
| C  | 0.46478900  | 3.64871200  | -2.95888000 |
| C  | 0.36429900  | 2.44354200  | -3.90815800 |

|   |             |             |             |
|---|-------------|-------------|-------------|
| C | 0.74658600  | 4.94949200  | -3.73128400 |
| H | -0.50784000 | 3.76486400  | -2.47504200 |
| H | 0.11958400  | 1.53421500  | -3.35539600 |
| H | -0.42072700 | 2.61290700  | -4.65317700 |
| H | 1.30340500  | 2.28118100  | -4.44843900 |
| H | 0.78197000  | 5.80902200  | -3.05433000 |
| H | 1.70627900  | 4.89946000  | -4.25695400 |
| H | -0.03466400 | 5.13198000  | -4.47705900 |
| C | 5.30299000  | 2.86851100  | -1.72202100 |
| C | 5.83798700  | 4.10221100  | -2.46875600 |
| C | 5.48735400  | 1.59354400  | -2.56054900 |
| H | 5.89628600  | 2.74756500  | -0.80653100 |
| H | 5.73231000  | 5.00609100  | -1.86114200 |
| H | 6.89668600  | 3.97690100  | -2.72072300 |
| H | 5.28835800  | 4.26299500  | -3.40227700 |
| H | 5.16806000  | 0.70911700  | -2.00394000 |
| H | 4.90374000  | 1.64053400  | -3.48571400 |
| H | 6.53947200  | 1.45848900  | -2.83301500 |
| C | 1.88905700  | 3.24241600  | 1.96764100  |
| C | 2.52024500  | 4.42861200  | 2.71389900  |
| C | 2.32433800  | 1.89825600  | 2.57613300  |
| H | 0.80830600  | 3.30837800  | 2.10177100  |
| H | 2.16170700  | 5.38357600  | 2.31700500  |
| H | 2.27465200  | 4.38904600  | 3.78067100  |
| H | 3.61198500  | 4.42107500  | 2.62126700  |
| H | 1.86219300  | 1.07683900  | 2.02433200  |
| H | 3.41300400  | 1.77582000  | 2.55024700  |
| H | 2.01483700  | 1.83866900  | 3.62562000  |
| C | -2.79822000 | -1.74765300 | 2.87205900  |
| C | -1.39002200 | -1.51872400 | 3.44436800  |
| C | -3.72255300 | -2.41273900 | 3.90752200  |
| H | -3.22097900 | -0.76730100 | 2.64454700  |
| H | -0.74190200 | -1.05508100 | 2.69808100  |
| H | -1.43963800 | -0.85701600 | 4.31547700  |
| H | -0.93576900 | -2.45973700 | 3.77416100  |
| H | -4.73518200 | -2.53341000 | 3.51021800  |
| H | -3.35331900 | -3.40507400 | 4.18890400  |
| H | -3.78142800 | -1.80573800 | 4.81719400  |
| C | -3.99157600 | -2.49931400 | -2.08270200 |
| C | -5.31733700 | -3.25489300 | -2.29092600 |
| C | -3.06666400 | -2.68719600 | -3.29646200 |
| H | -4.21689400 | -1.43363200 | -2.02323200 |
| H | -6.00228600 | -3.10548600 | -1.45093300 |
| H | -5.81645700 | -2.91342900 | -3.20376200 |

|   |             |             |             |
|---|-------------|-------------|-------------|
| H | -5.14152600 | -4.33245600 | -2.38520200 |
| H | -2.16184200 | -2.08578400 | -3.18352000 |
| H | -2.78635000 | -3.73547000 | -3.44685400 |
| H | -3.57821400 | -2.35552800 | -4.20619000 |
| C | -1.49141500 | -6.02503600 | 0.58361700  |
| C | -1.12146600 | -6.64929900 | -0.76659600 |
| C | -2.40039000 | -6.97655700 | 1.38487800  |
| H | -0.56251900 | -5.89602800 | 1.15811200  |
| H | -0.51254300 | -5.97212500 | -1.37243700 |
| H | -0.55948000 | -7.57561600 | -0.61218100 |
| H | -2.01530600 | -6.90574000 | -1.34531900 |
| H | -2.63313400 | -6.56773700 | 2.37212600  |
| H | -3.34700800 | -7.13094800 | 0.85569300  |
| H | -1.92214600 | -7.95248800 | 1.52039100  |
| C | 6.17922600  | -2.03027200 | 0.28420700  |
| C | 7.47808700  | -1.82506700 | 0.75226200  |
| C | 7.86840800  | -0.60427100 | 1.31005400  |
| C | 6.94547000  | 0.43820200  | 1.40566900  |
| C | 5.64626300  | 0.23191100  | 0.95037400  |
| C | 5.23928800  | -0.98319600 | 0.39439800  |
| H | 8.21750400  | -2.61619100 | 0.67991600  |
| H | 7.23339900  | 1.39644800  | 1.83156000  |
| H | 4.92515900  | 1.03735300  | 1.01860900  |
| C | 5.82466200  | -3.36790200 | -0.31774500 |
| H | 5.19333300  | -3.95390900 | 0.35997300  |
| H | 5.27237600  | -3.26351900 | -1.25561800 |
| H | 6.72632500  | -3.95143800 | -0.51762900 |
| C | 3.82612300  | -1.07405800 | -0.13054600 |
| H | 3.82746200  | -1.16321000 | -1.22024800 |
| H | 3.25878200  | -0.16983100 | 0.10597600  |
| N | 3.00323300  | -2.21154300 | 0.36109000  |
| C | 2.54506900  | -3.02586100 | -0.55265300 |
| O | 2.87364300  | -3.18423100 | -1.78274900 |
| C | 1.47780200  | -3.90399000 | -0.87694700 |
| H | 1.71949300  | -4.96450900 | -0.80856600 |
| C | 2.35693500  | -2.13248600 | 1.70957000  |
| C | 3.39184400  | -1.80570400 | 2.78547000  |
| C | 1.62125200  | -3.42913400 | 2.05089800  |
| H | 1.63327400  | -1.31628200 | 1.62542600  |
| H | 3.85875000  | -0.83427300 | 2.63156800  |
| H | 2.88453300  | -1.78123000 | 3.75402200  |
| H | 4.18122000  | -2.56296500 | 2.82522700  |
| H | 1.23790400  | -3.34643600 | 3.07027100  |
| H | 0.75783300  | -3.60699200 | 1.40522000  |

|   |            |             |            |
|---|------------|-------------|------------|
| H | 2.29381500 | -4.29312200 | 2.01179800 |
| O | 9.16009300 | -0.49491000 | 1.73715700 |
| H | 9.30104900 | 0.39369400  | 2.08848600 |

## TSL

|                                              |                             |
|----------------------------------------------|-----------------------------|
| Zero-point correction=                       | 1.220603 (Hartree/Particle) |
| Thermal correction to Energy=                | 1.280773                    |
| Thermal correction to Enthalpy=              | 1.281638                    |
| Thermal correction to Gibbs Free Energy=     | 1.127942                    |
| Sum of electronic and zero-point Energies=   | -3437.974286                |
| Sum of electronic and thermal Energies=      | -3437.914116                |
| Sum of electronic and thermal Enthalpies=    | -3437.913251                |
| Sum of electronic and thermal Free Energies= | -3438.066947                |

|   |             |             |             |
|---|-------------|-------------|-------------|
| C | 3.46747300  | -1.64431600 | 0.20347900  |
| C | 4.83842600  | -1.81739500 | -0.18642500 |
| C | 5.17695400  | 0.60714900  | 0.07934900  |
| C | 3.83344700  | 0.79963300  | 0.31953900  |
| C | 2.53453700  | -2.78896400 | 0.38276700  |
| C | 2.84856500  | -3.89443600 | 1.24671600  |
| C | 1.92884200  | -4.98945200 | 1.33207700  |
| C | 0.68195600  | -4.90666300 | 0.66410800  |
| C | 0.31616200  | -3.79130800 | -0.05814800 |
| H | 5.84166900  | 1.46460300  | 0.04182300  |
| H | -0.03211900 | -5.71562200 | 0.78555900  |
| C | 3.23254000  | 2.16414400  | 0.39987600  |
| C | 3.23255300  | 2.98829900  | -0.75063100 |
| C | 2.62753200  | 2.62644200  | 1.59068800  |
| C | 2.64839200  | 4.26265500  | -0.67552100 |
| C | 2.06682100  | 3.90658700  | 1.61594800  |
| C | 2.06533500  | 4.74587500  | 0.49792900  |
| H | 2.66019400  | 4.88710500  | -1.56073500 |
| H | 1.63003100  | 4.26989400  | 2.54375800  |
| C | -1.08810000 | -3.59274700 | -0.52278800 |
| C | -2.09668500 | -3.40580600 | 0.44811300  |
| C | -1.41467300 | -3.56394800 | -1.89473000 |
| C | -3.41795000 | -3.24549900 | 0.01934700  |
| C | -2.74443300 | -3.36334800 | -2.27138600 |
| C | -3.76504200 | -3.20626500 | -1.33003000 |
| H | -4.20279800 | -3.13805500 | 0.76318500  |
| H | -2.99015900 | -3.33788100 | -3.32902400 |
| C | 5.70667500  | -0.67813100 | -0.19773700 |
| C | 6.69602700  | -3.19785200 | -0.94349200 |



|    |             |             |             |
|----|-------------|-------------|-------------|
| C  | 7.56380700  | -2.08122600 | -0.90294900 |
| C  | 7.07381900  | -0.84780500 | -0.54328000 |
| C  | 5.37038800  | -3.06993500 | -0.59539800 |
| H  | 7.07789300  | -4.16418000 | -1.25847900 |
| H  | 8.60886500  | -2.19804900 | -1.17289000 |
| H  | 7.72144400  | 0.02474600  | -0.53555600 |
| H  | 4.71389400  | -3.92993700 | -0.63751100 |
| C  | 3.40714900  | -6.13641100 | 2.88680600  |
| C  | 4.28868200  | -5.03103100 | 2.85091300  |
| C  | 4.01635700  | -3.94038000 | 2.05592500  |
| C  | 2.24808800  | -6.10749000 | 2.14765800  |
| H  | 3.63807000  | -6.99373300 | 3.51164900  |
| H  | 5.18655500  | -5.03894700 | 3.46152800  |
| H  | 4.69673200  | -3.09874600 | 2.04846800  |
| H  | 1.54347600  | -6.93362200 | 2.18922400  |
| C  | 3.00416400  | -0.35241000 | 0.40521100  |
| C  | 1.28902100  | -2.76905500 | -0.22891300 |
| O  | 0.96488600  | -1.72517300 | -1.07924100 |
| O  | 1.68015000  | -0.15040300 | 0.74092800  |
| P  | 0.54252300  | -0.26826700 | -0.45671800 |
| O  | -0.79001900 | -0.23302100 | 0.21587900  |
| O  | 0.88560700  | 0.71718900  | -1.57355200 |
| Ag | 0.08658300  | 2.67374300  | -1.14307600 |
| C  | -0.36497200 | -3.78212600 | -2.97525000 |
| C  | -0.28406900 | -2.59310200 | -3.94646000 |
| C  | -0.62253300 | -5.10130000 | -3.72450600 |
| H  | 0.60890100  | -3.87266000 | -2.48772000 |
| H  | -0.06596400 | -1.66772200 | -3.40930100 |
| H  | 0.51046200  | -2.75807800 | -4.68239900 |
| H  | -1.22217700 | -2.46220300 | -4.49663800 |
| H  | -0.64089800 | -5.94932600 | -3.03253000 |
| H  | -1.58407900 | -5.07804200 | -4.24857000 |
| H  | 0.16067500  | -5.28226200 | -4.46869800 |
| C  | -5.20852200 | -2.99873100 | -1.75523200 |
| C  | -5.75399400 | -4.22537100 | -2.50542700 |
| C  | -5.37531300 | -1.71953400 | -2.59161400 |
| H  | -5.80215900 | -2.87252100 | -0.84060300 |
| H  | -5.66142300 | -5.13140500 | -1.89870600 |
| H  | -6.81010700 | -4.08764500 | -2.76157600 |
| H  | -5.20277100 | -4.39120800 | -3.43720700 |
| H  | -5.03444900 | -0.84223200 | -2.03668300 |
| H  | -4.79784400 | -1.77641600 | -3.52019500 |
| H  | -6.42639700 | -1.56540600 | -2.85785000 |
| C  | -1.80472900 | -3.33657700 | 1.94352600  |

|   |             |             |             |
|---|-------------|-------------|-------------|
| C | -2.36949700 | -4.56143700 | 2.68145700  |
| C | -2.31853800 | -2.02566200 | 2.56368200  |
| H | -0.72172100 | -3.34114600 | 2.07808800  |
| H | -1.95742500 | -5.49320000 | 2.28162300  |
| H | -2.13149300 | -4.51415800 | 3.74975700  |
| H | -3.45949800 | -4.61295300 | 2.58216800  |
| H | -1.91998100 | -1.17353700 | 2.00915600  |
| H | -3.41289800 | -1.97317300 | 2.55589300  |
| H | -1.99688800 | -1.95269500 | 3.60883300  |
| C | 2.58836500  | 1.79209500  | 2.86353000  |
| C | 1.14596200  | 1.55502100  | 3.34355900  |
| C | 3.44899000  | 2.43471600  | 3.96511700  |
| H | 3.02131400  | 0.81499600  | 2.64309900  |
| H | 0.54986300  | 1.08490400  | 2.55833600  |
| H | 1.13957900  | 0.89299800  | 4.21551700  |
| H | 0.66772900  | 2.49469800  | 3.64680200  |
| H | 4.48201600  | 2.56673100  | 3.62895500  |
| H | 3.06249000  | 3.41891300  | 4.25191800  |
| H | 3.45832600  | 1.80521100  | 4.86101100  |
| C | 3.85014900  | 2.55861500  | -2.07748400 |
| C | 5.16857500  | 3.31521600  | -2.32305800 |
| C | 2.89560300  | 2.73370600  | -3.27044300 |
| H | 4.07963900  | 1.49415200  | -2.01291200 |
| H | 5.87479100  | 3.17255800  | -1.49977700 |
| H | 5.64507900  | 2.96726500  | -3.24529400 |
| H | 4.98945100  | 4.39177700  | -2.42189000 |
| H | 1.99557200  | 2.13073800  | -3.13209000 |
| H | 2.60837300  | 3.78003600  | -3.42132500 |
| H | 3.38644900  | 2.39629400  | -4.18928300 |
| C | 1.46532500  | 6.13976200  | 0.60748000  |
| C | 1.15749800  | 6.79859800  | -0.74195500 |
| C | 2.37959800  | 7.04894700  | 1.45076800  |
| H | 0.51521100  | 6.03813900  | 1.15514800  |
| H | 0.55513700  | 6.15142700  | -1.38645400 |
| H | 0.61555100  | 7.73701800  | -0.59073100 |
| H | 2.07808000  | 7.03913100  | -1.28379600 |
| H | 2.56977900  | 6.61843700  | 2.43777300  |
| H | 3.34568000  | 7.17866900  | 0.95157800  |
| H | 1.92994700  | 8.03813800  | 1.58711700  |
| C | -6.25330100 | 1.95780200  | 0.48333600  |
| C | -7.40503200 | 1.59381200  | 1.18290900  |
| C | -7.54707500 | 0.31691400  | 1.73487100  |
| C | -6.52386300 | -0.62068700 | 1.58658400  |
| C | -5.37010600 | -0.25685300 | 0.89543800  |

|   |             |             |             |
|---|-------------|-------------|-------------|
| C | -5.21205900 | 1.01611700  | 0.34501500  |
| H | -8.22175700 | 2.29901300  | 1.30165400  |
| H | -6.62314600 | -1.61978300 | 2.00526400  |
| H | -4.57104700 | -0.97913300 | 0.77291900  |
| C | -6.14655100 | 3.34665200  | -0.09836500 |
| H | -5.51973200 | 3.98781000  | 0.53215300  |
| H | -5.68581900 | 3.34361400  | -1.08978600 |
| H | -7.13264800 | 3.81213000  | -0.17357300 |
| C | -3.95025200 | 1.31007000  | -0.42812800 |
| H | -4.17925000 | 1.51183500  | -1.47844700 |
| H | -3.27815500 | 0.44390000  | -0.39530600 |
| N | -3.18493700 | 2.48496800  | 0.02524300  |
| C | -2.75492400 | 3.35376700  | -0.94850000 |
| O | -3.26506900 | 3.50548100  | -2.05544600 |
| C | -1.47949900 | 4.03718100  | -0.59722700 |
| H | -1.36931200 | 5.07771700  | -0.91562400 |
| C | -2.26082400 | 2.31627300  | 1.15797300  |
| C | -2.95529400 | 1.89701600  | 2.45180700  |
| C | -1.55165700 | 3.65289300  | 1.37349800  |
| H | -1.51856900 | 1.55291500  | 0.89445000  |
| H | -3.35540300 | 0.88767300  | 2.36276500  |
| H | -2.22759600 | 1.89472400  | 3.27003700  |
| H | -3.77857400 | 2.57414100  | 2.69982100  |
| H | -0.50592600 | 3.59727100  | 1.65596300  |
| H | -1.71309700 | 4.53097000  | 0.53694400  |
| H | -2.12219100 | 4.30978700  | 2.04981900  |
| O | -8.70906900 | 0.04789600  | 2.40264600  |
| H | -8.68379800 | -0.86503100 | 2.71677800  |

## 5a

|                                              |                             |
|----------------------------------------------|-----------------------------|
| Zero-point correction=                       | 0.281528 (Hartree/Particle) |
| Thermal correction to Energy=                | 0.296611                    |
| Thermal correction to Enthalpy=              | 0.297555                    |
| Thermal correction to Gibbs Free Energy=     | 0.239531                    |
| Sum of electronic and zero-point Energies=   | -710.658592                 |
| Sum of electronic and thermal Energies=      | -710.643510                 |
| Sum of electronic and thermal Enthalpies=    | -710.642565                 |
| Sum of electronic and thermal Free Energies= | -710.700589                 |

|   |             |             |             |
|---|-------------|-------------|-------------|
| C | -1.25949900 | 0.98722100  | 0.21409000  |
| C | -2.55009100 | 0.84819100  | 0.72434200  |
| C | -3.43550900 | -0.10410400 | 0.21205400  |
| C | -3.03182200 | -0.93482600 | -0.83349900 |

|   |             |             |             |
|---|-------------|-------------|-------------|
| C | -1.74335700 | -0.79620000 | -1.34644400 |
| C | -0.84636200 | 0.14781300  | -0.84388600 |
| H | -2.89097100 | 1.48460600  | 1.53472300  |
| H | -3.71287500 | -1.67662500 | -1.24370700 |
| H | -1.42731600 | -1.44320800 | -2.16066200 |
| C | -0.33014000 | 2.00104400  | 0.83368600  |
| H | 0.31412800  | 1.52490300  | 1.58242800  |
| H | 0.33907100  | 2.46387200  | 0.10551600  |
| H | -0.89696300 | 2.78634300  | 1.34008900  |
| C | 0.54041100  | 0.23875800  | -1.44277200 |
| H | 0.76379400  | 1.25366600  | -1.78430800 |
| H | 0.59056300  | -0.42277100 | -2.31766500 |
| N | 1.62493500  | -0.10387000 | -0.53533200 |
| C | 2.62399500  | 0.78444900  | -0.23329200 |
| O | 2.67892900  | 1.94884900  | -0.60534600 |
| C | 3.62554500  | 0.05559100  | 0.65881500  |
| H | 4.64440400  | 0.34707200  | 0.39829500  |
| C | 1.80489000  | -1.43631100 | 0.04934800  |
| C | 0.89643000  | -1.69382200 | 1.25673900  |
| C | 3.30722800  | -1.42748700 | 0.42647000  |
| H | 1.59616300  | -2.18945900 | -0.72125000 |
| H | -0.15823800 | -1.62313000 | 0.98781200  |
| H | 1.08637000  | -2.69482100 | 1.65799700  |
| H | 1.09547200  | -0.96505500 | 2.04932400  |
| H | 3.89923400  | -1.80540300 | -0.41265300 |
| H | 3.45124200  | 0.36274400  | 1.69663600  |
| H | 3.51080300  | -2.06055300 | 1.29320700  |
| O | -4.67895100 | -0.17134900 | 0.77557900  |
| H | -5.18955400 | -0.85701200 | 0.32577600  |

## CPM

|                                              |                             |
|----------------------------------------------|-----------------------------|
| Zero-point correction=                       | 1.220841 (Hartree/Particle) |
| Thermal correction to Energy=                | 1.282635                    |
| Thermal correction to Enthalpy=              | 1.283500                    |
| Thermal correction to Gibbs Free Energy=     | 1.126782                    |
| Sum of electronic and zero-point Energies=   | -3437.980751                |
| Sum of electronic and thermal Energies=      | -3437.918957                |
| Sum of electronic and thermal Enthalpies=    | -3437.918092                |
| Sum of electronic and thermal Free Energies= | -3438.074810                |

|   |             |             |            |
|---|-------------|-------------|------------|
| C | -3.10215000 | -1.68195900 | 1.12534600 |
| C | -4.08115000 | -2.73326900 | 1.11220900 |
| C | -2.28633600 | -4.33070600 | 0.59066400 |

|   |             |             |             |
|---|-------------|-------------|-------------|
| C | -1.36402100 | -3.31184500 | 0.48092000  |
| C | -3.48226300 | -0.27512900 | 1.41916300  |
| C | -4.18599700 | 0.08888800  | 2.61597200  |
| C | -4.67645800 | 1.42705100  | 2.75305500  |
| C | -4.42549800 | 2.36940800  | 1.72438900  |
| C | -3.65592900 | 2.05795400  | 0.62396700  |
| H | -1.97313100 | -5.35224900 | 0.39873300  |
| H | -4.82690100 | 3.37365800  | 1.82228000  |
| C | 0.02214100  | -3.60151400 | 0.00463700  |
| C | 0.22177800  | -3.99360800 | -1.34155100 |
| C | 1.12062000  | -3.53560000 | 0.88617700  |
| C | 1.50861300  | -4.35934600 | -1.75559100 |
| C | 2.38751200  | -3.91198700 | 0.42303800  |
| C | 2.60286300  | -4.34092600 | -0.88744500 |
| H | 1.65272400  | -4.67478600 | -2.78332400 |
| H | 3.23038000  | -3.88427600 | 1.11000400  |
| C | -3.34415200 | 3.07061600  | -0.42625600 |
| C | -2.50687700 | 4.16569300  | -0.12036400 |
| C | -3.89227600 | 2.94023300  | -1.71960400 |
| C | -2.25555000 | 5.11983900  | -1.10911800 |
| C | -3.60368600 | 3.91758200  | -2.67623000 |
| C | -2.79148200 | 5.01494300  | -2.39365800 |
| H | -1.61165500 | 5.96142000  | -0.87067600 |
| H | -4.02560500 | 3.82253800  | -3.67340000 |
| C | -3.64820700 | -4.07933800 | 0.88674100  |
| C | -6.37340600 | -3.54043500 | 1.27952600  |
| C | -5.93530500 | -4.87465300 | 1.10871500  |
| C | -4.59980000 | -5.13335000 | 0.90943100  |
| C | -5.47323900 | -2.49896200 | 1.28029900  |
| H | -7.43209600 | -3.33429300 | 1.40464100  |
| H | -6.65591800 | -5.68667600 | 1.11744600  |
| H | -4.24989800 | -6.14931600 | 0.74743400  |
| H | -5.82575400 | -1.48304400 | 1.40229600  |
| C | -5.59493600 | 0.87993000  | 4.93818300  |
| C | -5.07654800 | -0.43124900 | 4.82179500  |
| C | -4.39178600 | -0.81671300 | 3.69139900  |
| C | -5.39290000 | 1.78774400  | 3.92491700  |
| H | -6.13910600 | 1.16911300  | 5.83212000  |
| H | -5.21562600 | -1.13861000 | 5.63383200  |
| H | -3.99272100 | -1.82081600 | 3.61532900  |
| H | -5.76775100 | 2.80420300  | 4.00903400  |
| C | -1.79373400 | -1.99097100 | 0.78597900  |
| C | -3.17148300 | 0.72621400  | 0.51124100  |
| O | -2.42002900 | 0.41974300  | -0.60983100 |

|    |             |             |             |
|----|-------------|-------------|-------------|
| O  | -0.84419300 | -0.98944400 | 0.78910600  |
| P  | -0.81179300 | 0.12221500  | -0.44264800 |
| O  | 0.01582800  | 1.26465400  | 0.03527300  |
| O  | -0.46998500 | -0.60909700 | -1.74770200 |
| Ag | 1.60488100  | -1.06680300 | -1.67918300 |
| C  | -4.81024100 | 1.78746900  | -2.10465800 |
| C  | -4.22225900 | 0.95533700  | -3.25661700 |
| C  | -6.22241900 | 2.29653500  | -2.44163600 |
| H  | -4.90885800 | 1.12451100  | -1.24208500 |
| H  | -3.23092100 | 0.58037600  | -2.99342100 |
| H  | -4.86960700 | 0.09892200  | -3.47556900 |
| H  | -4.13707000 | 1.54960900  | -4.17298000 |
| H  | -6.64859900 | 2.85659400  | -1.60316700 |
| H  | -6.20973300 | 2.95937700  | -3.31341700 |
| H  | -6.88978000 | 1.45803500  | -2.66888100 |
| C  | -2.48944500 | 6.05541700  | -3.45794300 |
| C  | -0.99030100 | 6.08585100  | -3.80059600 |
| C  | -2.99083700 | 7.44969900  | -3.04707100 |
| H  | -3.03248900 | 5.75951100  | -4.36486600 |
| H  | -0.64101000 | 5.09848800  | -4.11706100 |
| H  | -0.78813000 | 6.79978300  | -4.60671500 |
| H  | -0.39647500 | 6.38562300  | -2.93039000 |
| H  | -4.06282000 | 7.43326700  | -2.82846900 |
| H  | -2.47341300 | 7.80424200  | -2.14915800 |
| H  | -2.81267700 | 8.17907400  | -3.84482900 |
| C  | -1.84630500 | 4.33328200  | 1.24208900  |
| C  | -2.42446300 | 5.54100100  | 1.99766200  |
| C  | -0.31839100 | 4.42578200  | 1.11143000  |
| H  | -2.05726100 | 3.43906700  | 1.83237200  |
| H  | -3.50655300 | 5.44580400  | 2.13419000  |
| H  | -1.96325900 | 5.63633500  | 2.98691700  |
| H  | -2.24201800 | 6.47257300  | 1.45057900  |
| H  | 0.05589600  | 3.54332600  | 0.59064500  |
| H  | -0.01074600 | 5.32263600  | 0.56212500  |
| H  | 0.14380900  | 4.47322000  | 2.10459900  |
| C  | 0.96604300  | -3.08879700 | 2.33241700  |
| C  | 1.74317900  | -1.78827200 | 2.59350300  |
| C  | 1.37999100  | -4.19986500 | 3.31174600  |
| H  | -0.09068200 | -2.87729100 | 2.50970700  |
| H  | 1.37809900  | -0.99321200 | 1.93990600  |
| H  | 1.61379000  | -1.46400000 | 3.63176500  |
| H  | 2.81626300  | -1.92901500 | 2.42138900  |
| H  | 0.80705600  | -5.11470700 | 3.13186300  |
| H  | 2.44281600  | -4.44649400 | 3.21518900  |

|   |             |             |             |
|---|-------------|-------------|-------------|
| H | 1.20452400  | -3.88385000 | 4.34539800  |
| C | -0.91869400 | -4.05745200 | -2.35223300 |
| C | -1.29247800 | -5.52039300 | -2.65276200 |
| C | -0.60313100 | -3.30180400 | -3.65371000 |
| H | -1.78891700 | -3.57138200 | -1.90689200 |
| H | -1.56488500 | -6.06181700 | -1.74238500 |
| H | -2.14185400 | -5.56584700 | -3.34223800 |
| H | -0.45314400 | -6.05092500 | -3.11621600 |
| H | -0.42681200 | -2.24433100 | -3.44860300 |
| H | 0.26794400  | -3.71839500 | -4.17083300 |
| H | -1.45474800 | -3.37329200 | -4.33853900 |
| C | 3.97914400  | -4.81116900 | -1.32982000 |
| C | 4.39761300  | -4.27291500 | -2.70705400 |
| C | 4.04557000  | -6.34941300 | -1.30264200 |
| H | 4.70209000  | -4.43828000 | -0.59001100 |
| H | 4.35550200  | -3.18121000 | -2.74937400 |
| H | 5.42115700  | -4.58387400 | -2.93967300 |
| H | 3.75099200  | -4.66255000 | -3.49969100 |
| H | 3.79037600  | -6.73672000 | -0.31181500 |
| H | 3.33585600  | -6.77422500 | -2.02075800 |
| H | 5.04809200  | -6.70353900 | -1.56573000 |
| C | 7.32692500  | 1.63976900  | 0.85040800  |
| C | 8.23403200  | 1.99626400  | 1.84725000  |
| C | 8.18345700  | 3.25236000  | 2.46051300  |
| C | 7.21480400  | 4.17792200  | 2.06751600  |
| C | 6.30647900  | 3.82432500  | 1.07271300  |
| C | 6.33821800  | 2.56967400  | 0.46004600  |
| H | 9.00338600  | 1.29996200  | 2.16495600  |
| H | 7.17049400  | 5.16109500  | 2.52914700  |
| H | 5.55373400  | 4.54519000  | 0.76595000  |
| C | 7.41065400  | 0.26127500  | 0.24198300  |
| H | 6.66458900  | -0.40895700 | 0.68556400  |
| H | 7.23049600  | 0.26574600  | -0.83626900 |
| H | 8.39351700  | -0.18074100 | 0.42046400  |
| C | 5.31717700  | 2.24849400  | -0.60400900 |
| H | 5.79199600  | 1.93957400  | -1.53935100 |
| H | 4.71555400  | 3.13378600  | -0.82332100 |
| N | 4.39779100  | 1.15261800  | -0.23957300 |
| C | 4.35029100  | 0.08576500  | -1.00152000 |
| O | 4.96877100  | -0.22088500 | -2.06716600 |
| C | 3.56553500  | -1.09895500 | -1.09322200 |
| H | 4.07937300  | -1.97934200 | -0.70847000 |
| C | 3.45957600  | 1.23585500  | 0.91667200  |
| C | 2.78033500  | 2.59831500  | 0.97572300  |

|   |            |             |            |
|---|------------|-------------|------------|
| C | 4.14680900 | 0.85294200  | 2.22870400 |
| H | 2.67948300 | 0.50039100  | 0.69567400 |
| H | 2.31859300 | 2.84794000  | 0.01891300 |
| H | 1.97445700 | 2.54959500  | 1.70879300 |
| H | 3.47580900 | 3.38696300  | 1.27609300 |
| H | 3.39468400 | 0.79066500  | 3.01974800 |
| H | 4.63133700 | -0.12462100 | 2.14933300 |
| H | 4.89780100 | 1.59004200  | 2.51924900 |
| O | 9.10782900 | 3.51130000  | 3.42772300 |
| H | 8.97180600 | 4.40545400  | 3.76701000 |

## TSM

|                                              |                             |
|----------------------------------------------|-----------------------------|
| Zero-point correction=                       | 1.217168 (Hartree/Particle) |
| Thermal correction to Energy=                | 1.278209                    |
| Thermal correction to Enthalpy=              | 1.279074                    |
| Thermal correction to Gibbs Free Energy=     | 1.124852                    |
| Sum of electronic and zero-point Energies=   | -3437.980482                |
| Sum of electronic and thermal Energies=      | -3437.919441                |
| Sum of electronic and thermal Enthalpies=    | -3437.918576                |
| Sum of electronic and thermal Free Energies= | -3438.072798                |

|   |             |             |             |
|---|-------------|-------------|-------------|
| C | -3.33339900 | -1.61501500 | 0.88599200  |
| C | -4.31861100 | -2.65357900 | 0.78229800  |
| C | -2.50772200 | -4.26283900 | 0.36116300  |
| C | -1.56898500 | -3.25310200 | 0.33940900  |
| C | -3.70547800 | -0.21260500 | 1.21113800  |
| C | -4.45154300 | 0.12513300  | 2.39019800  |
| C | -4.86876500 | 1.48190600  | 2.58024200  |
| C | -4.48970800 | 2.46819900  | 1.63503200  |
| C | -3.68218300 | 2.17233400  | 0.55823300  |
| H | -2.19111300 | -5.28601000 | 0.18481800  |
| H | -4.81914800 | 3.49163000  | 1.78495600  |
| C | -0.14592500 | -3.55726300 | -0.00446500 |
| C | 0.18860400  | -3.90849800 | -1.33600600 |
| C | 0.85366400  | -3.55240900 | 0.99029800  |
| C | 1.50468700  | -4.29585500 | -1.62258200 |
| C | 2.14847800  | -3.96829000 | 0.65690500  |
| C | 2.49588600  | -4.35384900 | -0.63784000 |
| H | 1.75298600  | -4.57778000 | -2.64001900 |
| H | 2.91098000  | -3.99380400 | 1.43223900  |
| C | -3.20123700 | 3.22854800  | -0.38038500 |
| C | -2.24264500 | 4.17054700  | 0.05625400  |
| C | -3.69739300 | 3.28260200  | -1.69818000 |



|    |             |             |             |
|----|-------------|-------------|-------------|
| C  | -1.82842400 | 5.16701600  | -0.82985300 |
| C  | -3.24238200 | 4.29320600  | -2.55044000 |
| C  | -2.31258000 | 5.24568300  | -2.13738300 |
| H  | -1.09544200 | 5.89388600  | -0.49322800 |
| H  | -3.62301600 | 4.33965900  | -3.56751000 |
| C  | -3.88561100 | -3.99968700 | 0.55747000  |
| C  | -6.62569100 | -3.43315100 | 0.77659300  |
| C  | -6.19186600 | -4.76870100 | 0.60338200  |
| C  | -4.84894300 | -5.04104700 | 0.49021000  |
| C  | -5.71568500 | -2.40403700 | 0.86294900  |
| H  | -7.68805000 | -3.21668000 | 0.83549200  |
| H  | -6.92079500 | -5.57107200 | 0.54359500  |
| H  | -4.50116900 | -6.05801000 | 0.32989700  |
| H  | -6.06161500 | -1.38570800 | 0.98643800  |
| C  | -5.94246100 | 0.87252300  | 4.67650400  |
| C  | -5.49309500 | -0.45876800 | 4.51285600  |
| C  | -4.76745300 | -0.82262400 | 3.40086800  |
| C  | -5.62967600 | 1.82049300  | 3.73046100  |
| H  | -6.51999100 | 1.14470700  | 5.55470300  |
| H  | -5.71809300 | -1.19977600 | 5.27405200  |
| H  | -4.42247700 | -1.84321100 | 3.29067500  |
| H  | -5.94783500 | 2.85214500  | 3.85387200  |
| C  | -2.00723800 | -1.93166200 | 0.62855100  |
| C  | -3.30534800 | 0.81482600  | 0.37119400  |
| O  | -2.53771300 | 0.51361900  | -0.74237800 |
| O  | -1.05048800 | -0.94050900 | 0.70436000  |
| P  | -0.94416000 | 0.18793900  | -0.51434900 |
| O  | -0.13492300 | 1.31542100  | 0.02501000  |
| O  | -0.53599300 | -0.53287600 | -1.80340700 |
| Ag | 1.51575700  | -1.07417700 | -1.46406000 |
| C  | -4.72560200 | 2.28788900  | -2.21941700 |
| C  | -4.18002600 | 1.48576100  | -3.41264000 |
| C  | -6.04761300 | 2.99158100  | -2.57066400 |
| H  | -4.94563800 | 1.57491700  | -1.42105700 |
| H  | -3.25474700 | 0.97354000  | -3.13993600 |
| H  | -4.91070900 | 0.73482600  | -3.73300500 |
| H  | -3.97601100 | 2.13719700  | -4.26941900 |
| H  | -6.44835800 | 3.52943100  | -1.70553600 |
| H  | -5.90985600 | 3.71683800  | -3.37971400 |
| H  | -6.79678700 | 2.26287500  | -2.89902900 |
| C  | -1.82848100 | 6.32586300  | -3.08894300 |
| C  | -0.32290600 | 6.18734900  | -3.37184000 |
| C  | -2.16603300 | 7.73328400  | -2.56984800 |
| H  | -2.36027300 | 6.18430700  | -4.03874300 |

|   |             |             |             |
|---|-------------|-------------|-------------|
| H | -0.08844900 | 5.19363200  | -3.76504500 |
| H | 0.00841200  | 6.93554400  | -4.10044800 |
| H | 0.26115900  | 6.32903300  | -2.45609600 |
| H | -3.24062500 | 7.83994800  | -2.39351400 |
| H | -1.65177300 | 7.93709700  | -1.62448800 |
| H | -1.85704200 | 8.49914100  | -3.28968300 |
| C | -1.64679900 | 4.13468600  | 1.45887100  |
| C | -2.24391100 | 5.24749600  | 2.33750700  |
| C | -0.11184300 | 4.21439200  | 1.43969100  |
| H | -1.90601100 | 3.17286100  | 1.90742400  |
| H | -3.33258000 | 5.16461000  | 2.40728900  |
| H | -1.83381300 | 5.20376500  | 3.35269000  |
| H | -2.01405500 | 6.23526200  | 1.92241700  |
| H | 0.28583500  | 3.42058000  | 0.80708600  |
| H | 0.24298700  | 5.18366200  | 1.07198900  |
| H | 0.28016400  | 4.08803100  | 2.45581800  |
| C | 0.56824000  | -3.10237000 | 2.41541100  |
| C | 1.35186600  | -1.81887800 | 2.74312100  |
| C | 0.85675500  | -4.21533200 | 3.43563600  |
| H | -0.49432500 | -2.86127200 | 2.48867400  |
| H | 1.08345900  | -1.02338200 | 2.04340100  |
| H | 1.12181300  | -1.47440900 | 3.75711000  |
| H | 2.43202100  | -1.99931900 | 2.68903800  |
| H | 0.27908600  | -5.11589900 | 3.20625400  |
| H | 1.91675600  | -4.49102500 | 3.44388900  |
| H | 0.59110700  | -3.88683700 | 4.44584100  |
| C | -0.84395100 | -3.91523200 | -2.45847300 |
| C | -1.26521800 | -5.35823000 | -2.79286600 |
| C | -0.35786600 | -3.19556400 | -3.72696700 |
| H | -1.72460700 | -3.37561100 | -2.10368000 |
| H | -1.66314900 | -5.87659700 | -1.91659100 |
| H | -2.03738700 | -5.36209300 | -3.56905500 |
| H | -0.41102200 | -5.93641700 | -3.16280700 |
| H | -0.12140100 | -2.15111400 | -3.51412500 |
| H | 0.52045300  | -3.68023300 | -4.16628600 |
| H | -1.14937700 | -3.20765900 | -4.48334700 |
| C | 3.89646300  | -4.85535800 | -0.94947800 |
| C | 4.50309300  | -4.22798600 | -2.21437800 |
| C | 3.89645400  | -6.39216300 | -1.04926100 |
| H | 4.53531100  | -4.58048400 | -0.09826900 |
| H | 4.54155900  | -3.13618500 | -2.16413700 |
| H | 5.52498100  | -4.59177700 | -2.36296800 |
| H | 3.92943300  | -4.49807700 | -3.10679700 |
| H | 3.50156500  | -6.84638800 | -0.13560700 |

|   |            |             |             |
|---|------------|-------------|-------------|
| H | 3.26911400 | -6.72124200 | -1.88474100 |
| H | 4.90957200 | -6.77324100 | -1.21591300 |
| C | 7.55226400 | 1.48978200  | 0.69100900  |
| C | 8.42973000 | 1.83395900  | 1.71860000  |
| C | 8.26591800 | 3.01583900  | 2.44901200  |
| C | 7.21037700 | 3.87858500  | 2.14732600  |
| C | 6.33339700 | 3.53927600  | 1.11869600  |
| C | 6.48199500 | 2.35977000  | 0.38603700  |
| H | 9.26371600 | 1.18635400  | 1.96968200  |
| H | 7.07695700 | 4.80356700  | 2.70273800  |
| H | 5.51468200 | 4.21287000  | 0.87852600  |
| C | 7.75055300 | 0.18508800  | -0.04172300 |
| H | 7.11247800 | -0.60157800 | 0.37833500  |
| H | 7.49592500 | 0.25139600  | -1.10199300 |
| H | 8.78584600 | -0.15332200 | 0.04465400  |
| C | 5.47495100 | 2.02638800  | -0.68812700 |
| H | 5.95215100 | 1.78324800  | -1.64259900 |
| H | 4.81747400 | 2.88559700  | -0.86211900 |
| N | 4.66570000 | 0.85449900  | -0.37254900 |
| C | 4.52080500 | -0.22610000 | -1.18687100 |
| O | 5.13267600 | -0.50215000 | -2.21120800 |
| C | 3.42180800 | -1.07253100 | -0.65600100 |
| H | 3.75350100 | -1.95530400 | -0.10112700 |
| C | 3.79989200 | 0.72185000  | 0.78252300  |
| C | 2.78278200 | 1.83074800  | 0.94311700  |
| C | 4.49536700 | 0.27621100  | 2.05609400  |
| H | 3.10106000 | -0.21800400 | 0.43755200  |
| H | 2.21278000 | 1.99342700  | 0.02799000  |
| H | 2.06838600 | 1.59599200  | 1.73291900  |
| H | 3.31530900 | 2.74907000  | 1.21873500  |
| H | 3.76322600 | 0.00403300  | 2.81938100  |
| H | 5.16000500 | -0.57033300 | 1.87042200  |
| H | 5.10168500 | 1.10642700  | 2.43176100  |
| O | 9.16940800 | 3.26710300  | 3.43866000  |
| H | 8.95859400 | 4.11308000  | 3.85454500  |

#### 4a

|                                            |                             |
|--------------------------------------------|-----------------------------|
| Zero-point correction=                     | 0.278786 (Hartree/Particle) |
| Thermal correction to Energy=              | 0.294608                    |
| Thermal correction to Enthalpy=            | 0.295552                    |
| Thermal correction to Gibbs Free Energy=   | 0.235834                    |
| Sum of electronic and zero-point Energies= | -710.637673                 |
| Sum of electronic and thermal Energies=    | -710.621851                 |

Sum of electronic and thermal Enthalpies= -710.620907  
 Sum of electronic and thermal Free Energies= -710.680625

|   |             |             |             |
|---|-------------|-------------|-------------|
| C | -1.25638700 | 1.08590100  | -0.00533700 |
| C | -2.54473500 | 0.96351100  | 0.51466500  |
| C | -3.35479300 | -0.13033300 | 0.19730400  |
| C | -2.87797200 | -1.12204100 | -0.66064900 |
| C | -1.59267100 | -0.99958600 | -1.18542400 |
| C | -0.77107800 | 0.08473700  | -0.87450600 |
| H | -2.94297400 | 1.72309400  | 1.17976400  |
| H | -3.50107100 | -1.97501300 | -0.91847500 |
| H | -1.21977700 | -1.76991600 | -1.85564400 |
| C | -0.40876100 | 2.26634900  | 0.40141800  |
| H | 0.24976500  | 2.00489000  | 1.23760600  |
| H | 0.24598800  | 2.61685300  | -0.39946200 |
| H | -1.03712100 | 3.09959600  | 0.72567100  |
| C | 0.62540000  | 0.14699400  | -1.45308400 |
| H | 0.80657600  | 1.09315200  | -1.97434400 |
| H | 0.74711500  | -0.65551300 | -2.19159700 |
| N | 1.67030200  | 0.05432000  | -0.45546800 |
| C | 2.66525600  | 0.92905100  | -0.11225800 |
| O | 2.93678100  | 2.04193700  | -0.51435500 |
| C | 3.22543000  | -0.05620600 | 0.93292300  |
| H | 4.23296800  | -0.41682600 | 0.71343100  |
| C | 2.06372100  | -1.01144200 | 0.50146800  |
| C | 2.50389600  | -2.29358900 | -0.19903500 |
| C | 1.02264000  | -1.28058200 | 1.58592000  |
| H | 3.17750800  | 0.30197400  | 1.96384200  |
| H | 3.25364500  | -2.08002700 | -0.96651000 |
| H | 2.93309500  | -2.99830300 | 0.52005400  |
| H | 1.65096800  | -2.78580100 | -0.67872900 |
| H | 1.44399100  | -1.93315300 | 2.35766900  |
| H | 0.70250500  | -0.34770600 | 2.05735400  |
| H | 0.13645500  | -1.76734300 | 1.17033500  |
| O | -4.60106700 | -0.16974700 | 0.75645800  |
| H | -5.05713400 | -0.96430000 | 0.45006200  |

## CPI

Zero-point correction= 1.221254 (Hartree/Particle)  
 Thermal correction to Energy= 1.282384  
 Thermal correction to Enthalpy= 1.283249  
 Thermal correction to Gibbs Free Energy= 1.129923  
 Sum of electronic and zero-point Energies= -3437.982903

|                                              |              |
|----------------------------------------------|--------------|
| Sum of electronic and thermal Energies=      | -3437.921773 |
| Sum of electronic and thermal Enthalpies=    | -3437.920908 |
| Sum of electronic and thermal Free Energies= | -3438.074234 |

|   |             |             |             |
|---|-------------|-------------|-------------|
| C | 4.00505500  | -0.12451000 | -0.35792600 |
| C | 5.04511500  | 0.16328800  | -1.31038300 |
| C | 4.51255200  | 2.56449700  | -1.11771000 |
| C | 3.44023600  | 2.29021400  | -0.30007500 |
| C | 3.66322600  | -1.52205500 | 0.03421600  |
| C | 4.61602500  | -2.47592900 | 0.52842400  |
| C | 4.19942500  | -3.83518400 | 0.72211800  |
| C | 2.84730300  | -4.20856100 | 0.48838700  |
| C | 1.90146800  | -3.27682100 | 0.12686700  |
| H | 4.71338300  | 3.59017000  | -1.41096500 |
| H | 2.55980500  | -5.24378400 | 0.63980200  |
| C | 2.43624100  | 3.31917400  | 0.10890000  |
| C | 1.49184500  | 3.77453200  | -0.84046700 |
| C | 2.37033600  | 3.76653800  | 1.44209200  |
| C | 0.52333700  | 4.69479900  | -0.43539300 |
| C | 1.37602400  | 4.68228900  | 1.80088300  |
| C | 0.44345100  | 5.15749500  | 0.88047000  |
| H | -0.20019900 | 5.04808300  | -1.16342600 |
| H | 1.32202200  | 5.03059100  | 2.82898200  |
| C | 0.42850400  | -3.50509200 | 0.00282500  |
| C | -0.34933500 | -3.72344400 | 1.16329500  |
| C | -0.20754400 | -3.29386200 | -1.24107600 |
| C | -1.74177500 | -3.73073100 | 1.04912300  |
| C | -1.60598000 | -3.27418000 | -1.29731900 |
| C | -2.39133100 | -3.48511100 | -0.16081300 |
| H | -2.33462500 | -3.89720400 | 1.94137600  |
| H | -2.10099400 | -3.11275200 | -2.25097000 |
| C | 5.32746600  | 1.52917000  | -1.64323700 |
| C | 6.78693500  | -0.53253700 | -2.86780600 |
| C | 7.10286100  | 0.81688100  | -3.14725600 |
| C | 6.37881000  | 1.82268600  | -2.55141000 |
| C | 5.78539300  | -0.85025000 | -1.97781900 |
| H | 7.33435800  | -1.32769000 | -3.36492800 |
| H | 7.90051900  | 1.05410500  | -3.84456800 |
| H | 6.58636400  | 2.86452900  | -2.78002400 |
| H | 5.54983300  | -1.88860500 | -1.78540000 |
| C | 6.43880900  | -4.41805900 | 1.47811700  |
| C | 6.83678100  | -3.06927600 | 1.33047600  |
| C | 5.94878600  | -2.12381500 | 0.86817200  |
| C | 5.14634500  | -4.78688600 | 1.18415100  |

|   |             |             |             |
|---|-------------|-------------|-------------|
| H | 7.14975300  | -5.15568500 | 1.83758200  |
| H | 7.84939700  | -2.77533100 | 1.58958000  |
| H | 6.25934500  | -1.09121400 | 0.76409000  |
| H | 4.82174600  | -5.81535000 | 1.31710500  |
| C | 3.24077900  | 0.94053900  | 0.09900700  |
| C | 2.35327300  | -1.94700400 | -0.09308800 |
| O | 1.39366100  | -1.04557500 | -0.50158700 |
| O | 2.23694100  | 0.72925300  | 1.02859200  |
| P | 0.82375800  | 0.03031700  | 0.59630400  |
| O | 0.25108000  | -0.57717400 | 1.84017800  |
| C | 0.57856800  | -3.12369500 | -2.53454900 |
| C | 0.16416900  | -1.87411300 | -3.32855800 |
| C | 0.45285500  | -4.39383300 | -3.39590400 |
| H | 1.63516400  | -3.01169300 | -2.27975700 |
| H | 0.27539100  | -0.97496900 | -2.71740200 |
| H | 0.79650200  | -1.76242500 | -4.21611100 |
| H | -0.87395700 | -1.93891300 | -3.67212500 |
| H | 0.79059200  | -5.27629800 | -2.84379800 |
| H | -0.58748500 | -4.56383000 | -3.69421600 |
| H | 1.05579100  | -4.30633300 | -4.30626800 |
| C | -3.90648700 | -3.47629700 | -0.25043800 |
| C | -4.52293800 | -2.50448100 | 0.76341700  |
| C | -4.47575200 | -4.89450400 | -0.07437300 |
| H | -4.17589800 | -3.12298300 | -1.25330300 |
| H | -4.17510000 | -1.48270900 | 0.59610700  |
| H | -5.61487300 | -2.51734300 | 0.69396000  |
| H | -4.25730800 | -2.76956500 | 1.79107400  |
| H | -4.05326400 | -5.58232000 | -0.81296000 |
| H | -4.24006400 | -5.28742000 | 0.92057800  |
| H | -5.56567700 | -4.89526100 | -0.18799700 |
| C | 0.28204800  | -3.94130400 | 2.53186900  |
| C | 0.43354800  | -5.44767400 | 2.81571700  |
| C | -0.48965400 | -3.26250100 | 3.67385300  |
| H | 1.27967700  | -3.49608000 | 2.50904000  |
| H | 1.01823500  | -5.95312700 | 2.04197900  |
| H | 0.92712500  | -5.61253400 | 3.77963100  |
| H | -0.54989400 | -5.93006800 | 2.85226100  |
| H | -0.69183800 | -2.21589700 | 3.44684800  |
| H | -1.44186800 | -3.76526000 | 3.87812300  |
| H | 0.10003400  | -3.31059200 | 4.59524200  |
| C | 3.35450400  | 3.28921000  | 2.50021900  |
| C | 2.63893800  | 2.61838400  | 3.68429500  |
| C | 4.25596300  | 4.44398600  | 2.97006700  |
| H | 4.00402500  | 2.53832000  | 2.04265400  |

|    |             |             |             |
|----|-------------|-------------|-------------|
| H  | 2.01814700  | 1.78782600  | 3.34147100  |
| H  | 3.37118400  | 2.22793500  | 4.39929600  |
| H  | 2.00053200  | 3.32896500  | 4.22026900  |
| H  | 4.79435000  | 4.89017200  | 2.12783800  |
| H  | 3.66851700  | 5.23567500  | 3.44757500  |
| H  | 4.99250500  | 4.08759200  | 3.69836100  |
| C  | 1.50318700  | 3.29352700  | -2.28736800 |
| C  | 2.18402400  | 4.33023100  | -3.19873600 |
| C  | 0.10124100  | 2.95041300  | -2.81820300 |
| H  | 2.09086000  | 2.37295600  | -2.32849500 |
| H  | 3.20840100  | 4.53615500  | -2.87656700 |
| H  | 2.21775400  | 3.97569500  | -4.23485200 |
| H  | 1.63408800  | 5.27794600  | -3.18129700 |
| H  | -0.39060500 | 2.24642000  | -2.14513500 |
| H  | -0.52661800 | 3.84260900  | -2.92224000 |
| H  | 0.18193900  | 2.49296300  | -3.81066100 |
| C  | -0.63560600 | 6.14040600  | 1.30104400  |
| C  | -2.03971500 | 5.53123100  | 1.14817600  |
| C  | -0.52254000 | 7.46848300  | 0.53451800  |
| H  | -0.48188800 | 6.35551900  | 2.36630300  |
| H  | -2.13305300 | 4.60548300  | 1.72221600  |
| H  | -2.80907500 | 6.23100200  | 1.49311700  |
| H  | -2.24865000 | 5.29575400  | 0.09831200  |
| H  | 0.46845200  | 7.91372700  | 0.66391900  |
| H  | -0.68176200 | 7.31750500  | -0.53866200 |
| H  | -1.27165500 | 8.18664200  | 0.88552500  |
| O  | -0.04548800 | 0.93333700  | -0.26598200 |
| Ag | -1.89120300 | -0.04055700 | -0.93584800 |
| C  | -3.68116500 | 0.31680600  | -1.95281600 |
| C  | -5.06661000 | 0.10915500  | -1.68793000 |
| C  | -7.46130400 | 0.24489600  | -1.20585000 |
| O  | -5.05035400 | -0.86190800 | -2.50939500 |
| N  | -6.04085300 | 0.63681600  | -0.97672200 |
| C  | -5.73750000 | 1.84355500  | -0.14075700 |
| H  | -6.69746100 | 2.14829000  | 0.28162500  |
| H  | -5.39857000 | 2.65170800  | -0.79693600 |
| C  | -4.70697200 | 1.56024300  | 0.91642600  |
| C  | -3.40233800 | 2.04022900  | 0.75535000  |
| C  | -4.99867700 | 0.73700400  | 2.02541200  |
| C  | -2.36947900 | 1.65784400  | 1.60927800  |
| C  | -3.96285200 | 0.34898000  | 2.87188300  |
| C  | -2.63493100 | 0.74539800  | 2.64335000  |
| H  | -1.36456900 | 2.02418800  | 1.44338400  |
| H  | -4.15688500 | -0.31906200 | 3.70502100  |

|   |             |             |             |
|---|-------------|-------------|-------------|
| H | -7.99442400 | 0.65192300  | -0.34219800 |
| C | -7.98005700 | 0.92037800  | -2.47920900 |
| H | -9.04486800 | 0.70846000  | -2.61198800 |
| H | -7.85137100 | 2.00586600  | -2.43342700 |
| H | -7.44449900 | 0.54132300  | -3.35461500 |
| C | -7.67344400 | -1.26927200 | -1.22093400 |
| H | -7.20358100 | -1.73497300 | -2.08796800 |
| H | -7.26872100 | -1.73393600 | -0.32009900 |
| H | -8.74801500 | -1.47033600 | -1.25678900 |
| O | -1.67070100 | 0.24833000  | 3.43767600  |
| H | -0.85042300 | 0.08607800  | 2.89733100  |
| H | -3.58342400 | 0.94661400  | -2.84426700 |
| H | -3.17976400 | 2.72323100  | -0.06134400 |
| C | -6.39667600 | 0.22947600  | 2.27804700  |
| H | -7.13343800 | 1.04153800  | 2.27414800  |
| H | -6.70345200 | -0.49432400 | 1.51607900  |
| H | -6.45951900 | -0.26984200 | 3.24719300  |

## TSG

|                                              |                             |
|----------------------------------------------|-----------------------------|
| Zero-point correction=                       | 1.220569 (Hartree/Particle) |
| Thermal correction to Energy=                | 1.281072                    |
| Thermal correction to Enthalpy=              | 1.281937                    |
| Thermal correction to Gibbs Free Energy=     | 1.130478                    |
| Sum of electronic and zero-point Energies=   | -3437.977645                |
| Sum of electronic and thermal Energies=      | -3437.917141                |
| Sum of electronic and thermal Enthalpies=    | -3437.916276                |
| Sum of electronic and thermal Free Energies= | -3438.067736                |

|   |            |             |             |
|---|------------|-------------|-------------|
| C | 4.04964800 | -0.19235800 | -0.31871800 |
| C | 5.13631300 | 0.05975800  | -1.22855400 |
| C | 4.67654500 | 2.47730300  | -1.05990000 |
| C | 3.56493200 | 2.23903900  | -0.28533300 |
| C | 3.64000800 | -1.57836600 | 0.04892400  |
| C | 4.52944900 | -2.57370900 | 0.57689300  |
| C | 4.04499400 | -3.91329100 | 0.74909100  |
| C | 2.68613400 | -4.22435100 | 0.46824000  |
| C | 1.79668100 | -3.25072200 | 0.07402800  |
| H | 4.92020900 | 3.49522200  | -1.34795500 |
| H | 2.34682300 | -5.24454200 | 0.61341100  |
| C | 2.57340500 | 3.29700200  | 0.07771100  |
| C | 1.63572200 | 3.71739400  | -0.89376500 |
| C | 2.50731100 | 3.79756900  | 1.39068000  |
| C | 0.67114400 | 4.65820600  | -0.52975500 |



|   |             |             |             |
|---|-------------|-------------|-------------|
| C | 1.51755900  | 4.73317400  | 1.70902300  |
| C | 0.58989300  | 5.17357900  | 0.76659300  |
| H | -0.05022900 | 4.98286800  | -1.27284800 |
| H | 1.46031300  | 5.12140100  | 2.72267000  |
| C | 0.31729300  | -3.41071600 | -0.08080400 |
| C | -0.49311000 | -3.65144700 | 1.05398600  |
| C | -0.28924600 | -3.12126100 | -1.32528400 |
| C | -1.88516100 | -3.60685500 | 0.91827300  |
| C | -1.68810300 | -3.04610800 | -1.40364700 |
| C | -2.50747000 | -3.29183200 | -0.29028000 |
| H | -2.49743200 | -3.79809700 | 1.79162800  |
| H | -2.15998900 | -2.85921700 | -2.36450900 |
| C | 5.47855100  | 1.41472900  | -1.54965000 |
| C | 6.91497300  | -0.69635400 | -2.71525900 |
| C | 7.28818800  | 0.64112900  | -2.98084500 |
| C | 6.57514600  | 1.67142400  | -2.41430700 |
| C | 5.86780400  | -0.97880500 | -1.86686300 |
| H | 7.45433900  | -1.51027700 | -3.19035400 |
| H | 8.12103900  | 0.85040400  | -3.64516600 |
| H | 6.82688800  | 2.70541500  | -2.63398700 |
| H | 5.58934400  | -2.00848200 | -1.68559200 |
| C | 6.22474400  | -4.59764400 | 1.58925200  |
| C | 6.68771800  | -3.26743200 | 1.46366000  |
| C | 5.86176600  | -2.28199300 | 0.97084900  |
| C | 4.92974900  | -4.90776300 | 1.24334200  |
| H | 6.88755700  | -5.36716100 | 1.97296000  |
| H | 7.70134400  | -3.01975000 | 1.76385300  |
| H | 6.22149400  | -1.26393500 | 0.88312600  |
| H | 4.55477400  | -5.92104700 | 1.35939600  |
| C | 3.30490500  | 0.89883100  | 0.11078300  |
| C | 2.31979200  | -1.94517500 | -0.13587800 |
| O | 1.42298000  | -0.99785600 | -0.57826000 |
| O | 2.26076700  | 0.72956300  | 1.00374500  |
| P | 0.84149000  | 0.05769600  | 0.53824600  |
| O | 0.27393500  | -0.61262300 | 1.75799500  |
| C | 0.51751600  | -2.94532600 | -2.60502500 |
| C | 0.14443000  | -1.67234400 | -3.38202100 |
| C | 0.36844900  | -4.19859400 | -3.48808500 |
| H | 1.57272100  | -2.86661900 | -2.33561300 |
| H | 0.26176400  | -0.78657300 | -2.75326000 |
| H | 0.79708700  | -1.55923500 | -4.25418900 |
| H | -0.88689000 | -1.70900100 | -3.74958000 |
| H | 0.67577700  | -5.09879500 | -2.94692600 |
| H | -0.67155500 | -4.33552500 | -3.80413200 |

|   |             |             |             |
|---|-------------|-------------|-------------|
| H | 0.98619100  | -4.11143300 | -4.38820200 |
| C | -4.01900900 | -3.29734900 | -0.44348500 |
| C | -4.73043200 | -2.53316700 | 0.67857400  |
| C | -4.53629500 | -4.74386400 | -0.54059500 |
| H | -4.25266400 | -2.78941900 | -1.38705600 |
| H | -4.38761400 | -1.49780600 | 0.73184400  |
| H | -5.81156400 | -2.53403200 | 0.50983300  |
| H | -4.55211500 | -2.98843500 | 1.65796600  |
| H | -4.05435800 | -5.28063900 | -1.36326200 |
| H | -4.32722000 | -5.29194500 | 0.38457700  |
| H | -5.61893100 | -4.75977200 | -0.70760300 |
| C | 0.09855000  | -3.95363700 | 2.42377800  |
| C | 0.16000500  | -5.47602100 | 2.65194500  |
| C | -0.65803800 | -3.27628700 | 3.57672400  |
| H | 1.11865100  | -3.56343500 | 2.43522600  |
| H | 0.72463400  | -5.98669400 | 1.86673100  |
| H | 0.63045200  | -5.70337700 | 3.61452800  |
| H | -0.84960700 | -5.90242100 | 2.66018700  |
| H | -0.79846200 | -2.21204100 | 3.38916700  |
| H | -1.64041900 | -3.73253300 | 3.74436300  |
| H | -0.09030500 | -3.39285500 | 4.50564900  |
| C | 3.47798100  | 3.34334800  | 2.47086800  |
| C | 2.74442100  | 2.68458200  | 3.65092600  |
| C | 4.36614700  | 4.50793200  | 2.94081100  |
| H | 4.13798700  | 2.58899700  | 2.03338700  |
| H | 2.13994300  | 1.84216300  | 3.30756300  |
| H | 3.46427200  | 2.31430800  | 4.38899900  |
| H | 2.08600300  | 3.39746400  | 4.15899700  |
| H | 4.91514900  | 4.94731000  | 2.10187700  |
| H | 3.76811700  | 5.30221600  | 3.40049700  |
| H | 5.09316300  | 4.16381300  | 3.68441400  |
| C | 1.65734800  | 3.17501200  | -2.31885800 |
| C | 2.39908300  | 4.14570900  | -3.25507000 |
| C | 0.25659300  | 2.85964700  | -2.86881200 |
| H | 2.21106600  | 2.23225400  | -2.30662200 |
| H | 3.42418300  | 4.32310700  | -2.91870700 |
| H | 2.43943900  | 3.74814700  | -4.27520000 |
| H | 1.88731200  | 5.11420900  | -3.28739600 |
| H | -0.27489100 | 2.20231100  | -2.17896900 |
| H | -0.33410200 | 3.76891400  | -3.02883700 |
| H | 0.34540800  | 2.35796000  | -3.83893600 |
| C | -0.49361100 | 6.16835400  | 1.14600800  |
| C | -1.89236100 | 5.53750700  | 1.03431400  |
| C | -0.40060500 | 7.45795500  | 0.31422500  |

|    |             |             |             |
|----|-------------|-------------|-------------|
| H  | -0.33452200 | 6.43735300  | 2.19818100  |
| H  | -1.97123100 | 4.64163400  | 1.65627800  |
| H  | -2.66777100 | 6.24532400  | 1.34803400  |
| H  | -2.10369800 | 5.24590600  | -0.00090800 |
| H  | 0.58681600  | 7.91865700  | 0.41309800  |
| H  | -0.56719400 | 7.25346500  | -0.74887400 |
| H  | -1.15401600 | 8.18517200  | 0.63623100  |
| O  | -0.04746800 | 0.96603300  | -0.28479600 |
| Ag | -1.93062600 | -0.33041800 | -0.71884700 |
| C  | -3.68700500 | 0.53782300  | -1.54109000 |
| C  | -5.10344300 | 0.33136100  | -1.53440300 |
| C  | -7.52195200 | 0.53565900  | -1.25025800 |
| O  | -5.10007300 | -0.47123300 | -2.51033700 |
| N  | -6.12113500 | 0.82713800  | -0.84330600 |
| C  | -5.84341000 | 1.95253300  | 0.09523700  |
| H  | -6.78604100 | 2.15073800  | 0.60903800  |
| H  | -5.58948900 | 2.84949000  | -0.48159400 |
| C  | -4.74123600 | 1.61299300  | 1.05810100  |
| C  | -3.44525300 | 2.09700200  | 0.84195300  |
| C  | -4.97167000 | 0.72193600  | 2.12844900  |
| C  | -2.36493000 | 1.67025100  | 1.61582000  |
| C  | -3.89289000 | 0.30056800  | 2.89940000  |
| C  | -2.57889300 | 0.72338900  | 2.63043400  |
| H  | -1.36853600 | 2.03709100  | 1.40511400  |
| H  | -4.03912300 | -0.40887100 | 3.70771000  |
| H  | -8.13175600 | 0.97752900  | -0.45634000 |
| C  | -7.85213900 | 1.23199300  | -2.57467600 |
| H  | -8.90630300 | 1.08321900  | -2.82597400 |
| H  | -7.66600200 | 2.30834500  | -2.51047200 |
| H  | -7.24369100 | 0.81856900  | -3.38308400 |
| C  | -7.80780500 | -0.96694200 | -1.28716100 |
| H  | -7.22389200 | -1.46287100 | -2.06386000 |
| H  | -7.57408500 | -1.43220300 | -0.32666900 |
| H  | -8.87015000 | -1.12470800 | -1.49457700 |
| O  | -1.58526000 | 0.21243100  | 3.37617100  |
| H  | -0.78191300 | 0.04677700  | 2.80529200  |
| H  | -3.45758500 | 1.35369600  | -2.23965300 |
| H  | -3.26930700 | 2.82918600  | 0.05692500  |
| C  | -6.35416400 | 0.19120700  | 2.41638000  |
| H  | -7.06743000 | 1.00035200  | 2.61415200  |
| H  | -6.74284600 | -0.38688200 | 1.57172900  |
| H  | -6.34532100 | -0.46375100 | 3.29001300  |

**CPH**

|                                              |                             |
|----------------------------------------------|-----------------------------|
| Zero-point correction=                       | 1.230825 (Hartree/Particle) |
| Thermal correction to Energy=                | 1.292836                    |
| Thermal correction to Enthalpy=              | 1.293701                    |
| Thermal correction to Gibbs Free Energy=     | 1.139387                    |
| Sum of electronic and zero-point Energies=   | -3547.509002                |
| Sum of electronic and thermal Energies=      | -3547.446990                |
| Sum of electronic and thermal Enthalpies=    | -3547.446125                |
| Sum of electronic and thermal Free Energies= | -3547.600439                |

|   |             |             |             |
|---|-------------|-------------|-------------|
| C | -3.77441600 | -0.59207400 | 0.46842100  |
| C | -4.93618200 | -0.49164600 | 1.30598500  |
| C | -4.70587400 | 1.96462200  | 1.26424200  |
| C | -3.53382300 | 1.87338500  | 0.54736800  |
| C | -3.25652400 | -1.89768200 | -0.03178800 |
| C | -4.05558800 | -2.81798600 | -0.79128900 |
| C | -3.47859400 | -4.06712900 | -1.19484700 |
| C | -2.11547900 | -4.34369800 | -0.90692300 |
| C | -1.31551600 | -3.42676100 | -0.26401400 |
| H | -5.08624900 | 2.94175300  | 1.54529900  |
| H | -1.69607400 | -5.28849600 | -1.23745600 |
| C | -2.72335100 | 3.06808300  | 0.15649800  |
| C | -1.89864200 | 3.70883800  | 1.10665600  |
| C | -2.76452900 | 3.53059100  | -1.17442300 |
| C | -1.17472600 | 4.83848300  | 0.71361800  |
| C | -2.02424300 | 4.66613800  | -1.51832200 |
| C | -1.23194100 | 5.34042000  | -0.58897100 |
| H | -0.55087000 | 5.34094200  | 1.44603600  |
| H | -2.06423900 | 5.03758400  | -2.53809000 |
| C | 0.15742300  | -3.57121500 | -0.04626100 |
| C | 1.05653700  | -3.46188200 | -1.12876100 |
| C | 0.65189600  | -3.65314200 | 1.27679100  |
| C | 2.43643900  | -3.36019200 | -0.85739300 |
| C | 2.02302300  | -3.52474700 | 1.50525700  |
| C | 2.93926800  | -3.35348900 | 0.45893600  |
| H | 3.13152100  | -3.33751900 | -1.68988700 |
| H | 2.39859000  | -3.56562600 | 2.52363500  |
| C | -5.41568500 | 0.80710100  | 1.67771000  |
| C | -6.73343600 | -1.49329700 | 2.60933400  |
| C | -7.23151000 | -0.21092800 | 2.93746000  |
| C | -6.57962600 | 0.91210400  | 2.48394100  |
| C | -5.61599100 | -1.63004000 | 1.81676600  |
| H | -7.23322400 | -2.37840500 | 2.99119000  |
| H | -8.11723300 | -0.11683400 | 3.55821600  |

|   |             |             |             |
|---|-------------|-------------|-------------|
| H | -6.93702200 | 1.90370600  | 2.74794600  |
| H | -5.23843200 | -2.61707700 | 1.58008500  |
| C | -5.56757600 | -4.69657600 | -2.27184500 |
| C | -6.12207200 | -3.44536700 | -1.91614400 |
| C | -5.38597900 | -2.53027800 | -1.19721500 |
| C | -4.27087100 | -4.99391400 | -1.92216900 |
| H | -6.16098500 | -5.41179100 | -2.83306700 |
| H | -7.13606400 | -3.20113200 | -2.21787700 |
| H | -5.81814500 | -1.57204000 | -0.93787900 |
| H | -3.82368300 | -5.94119700 | -2.21115600 |
| C | -3.09712100 | 0.57869200  | 0.15960500  |
| C | -1.92899000 | -2.22135400 | 0.18613800  |
| O | -1.13651300 | -1.32989300 | 0.88645900  |
| O | -1.95419200 | 0.52538600  | -0.61677500 |
| P | -0.55557200 | -0.03814800 | 0.04091800  |
| O | 0.19398000  | -0.53213000 | -1.19215300 |
| C | -0.27967100 | -3.94774100 | 2.44504300  |
| C | -0.17423400 | -2.93087400 | 3.58886500  |
| C | -0.03102000 | -5.38209500 | 2.94834000  |
| H | -1.30524400 | -3.91229100 | 2.07013400  |
| H | -0.35717200 | -1.91851100 | 3.22400100  |
| H | -0.91739200 | -3.16079000 | 4.35968200  |
| H | 0.81098300  | -2.95517800 | 4.06389700  |
| H | -0.15346900 | -6.11108500 | 2.14110900  |
| H | 0.98430500  | -5.48891100 | 3.34549200  |
| H | -0.73404300 | -5.63474800 | 3.74900400  |
| C | 4.42771300  | -3.28487900 | 0.77039400  |
| C | 5.25862100  | -2.54870900 | -0.28551900 |
| C | 4.97926000  | -4.70622700 | 0.99477200  |
| H | 4.53559600  | -2.72473100 | 1.70655400  |
| H | 4.87355900  | -1.53630100 | -0.45943200 |
| H | 6.29296000  | -2.44823200 | 0.05222700  |
| H | 5.26837300  | -3.07729500 | -1.24487000 |
| H | 4.42554000  | -5.22449800 | 1.78266400  |
| H | 4.89383200  | -5.30084400 | 0.07826100  |
| H | 6.03486700  | -4.67145500 | 1.28302200  |
| C | 0.58378600  | -3.48890800 | -2.57584300 |
| C | 0.67254900  | -4.92933100 | -3.11840700 |
| C | 1.33708200  | -2.52906400 | -3.50807500 |
| H | -0.46566800 | -3.18599300 | -2.58320600 |
| H | 0.12107600  | -5.63396500 | -2.49006800 |
| H | 0.26647300  | -4.98469900 | -4.13375200 |
| H | 1.71564100  | -5.26427900 | -3.15192400 |
| H | 1.25337700  | -1.49820500 | -3.16326600 |

|    |             |             |             |
|----|-------------|-------------|-------------|
| H  | 2.39735400  | -2.78963700 | -3.60219900 |
| H  | 0.90584400  | -2.57938600 | -4.51296200 |
| C  | -3.63003800 | 2.85012100  | -2.22573300 |
| C  | -2.90231000 | 2.66332400  | -3.56529000 |
| C  | -4.95138600 | 3.61850000  | -2.40369400 |
| H  | -3.88380500 | 1.85299800  | -1.85875700 |
| H  | -1.93939400 | 2.16321500  | -3.43177200 |
| H  | -3.51421500 | 2.05737000  | -4.24182900 |
| H  | -2.71874900 | 3.62003500  | -4.06613700 |
| H  | -5.49713900 | 3.68254500  | -1.45698000 |
| H  | -4.76324600 | 4.63978400  | -2.75296500 |
| H  | -5.59530400 | 3.12158700  | -3.13760700 |
| C  | -1.80135800 | 3.21484500  | 2.54492100  |
| C  | -2.73295900 | 4.02870300  | 3.46097100  |
| C  | -0.36379100 | 3.23043900  | 3.08715000  |
| H  | -2.13461700 | 2.17363000  | 2.55904900  |
| H  | -3.77397500 | 3.96853000  | 3.13228500  |
| H  | -2.68038900 | 3.66168600  | 4.49181100  |
| H  | -2.44462600 | 5.08596500  | 3.46197700  |
| H  | 0.29087400  | 2.66704300  | 2.42149100  |
| H  | 0.01989900  | 4.25021300  | 3.20296100  |
| H  | -0.33746800 | 2.76157900  | 4.07678000  |
| C  | -0.46509300 | 6.59065800  | -0.98662000 |
| C  | 1.05406500  | 6.40610900  | -0.84044300 |
| C  | -0.95014200 | 7.81697000  | -0.19510700 |
| H  | -0.67515000 | 6.77446200  | -2.04808300 |
| H  | 1.40810000  | 5.56415200  | -1.44119600 |
| H  | 1.58736000  | 7.30771500  | -1.16107900 |
| H  | 1.32648000  | 6.21269600  | 0.20328000  |
| H  | -2.02699200 | 7.96448100  | -0.32022600 |
| H  | -0.75309100 | 7.69545200  | 0.87543800  |
| H  | -0.43633600 | 8.72493900  | -0.52913900 |
| O  | 0.10462400  | 0.86184300  | 1.02914600  |
| Ag | 2.41173100  | -0.73639100 | -0.57179200 |
| C  | 3.08167100  | 0.58099800  | 1.34620800  |
| C  | 4.57216200  | 0.64623000  | 1.44613600  |
| C  | 6.69672600  | 1.74853800  | 0.90733600  |
| O  | 5.15830200  | -0.17577400 | 2.15833900  |
| N  | 5.22698900  | 1.60125300  | 0.71162200  |
| C  | 4.52873500  | 2.76303300  | 0.11497300  |
| H  | 5.31487400  | 3.38433500  | -0.32308700 |
| H  | 4.05767700  | 3.36807000  | 0.90001500  |
| C  | 3.49208000  | 2.42302600  | -0.93107000 |
| C  | 2.18915500  | 2.91010600  | -0.78100100 |

|   |             |             |             |
|---|-------------|-------------|-------------|
| C | 3.79034200  | 1.57562300  | -2.01989800 |
| C | 1.15426300  | 2.52006500  | -1.62671300 |
| C | 2.73757000  | 1.15826500  | -2.84702100 |
| C | 1.42150400  | 1.59137400  | -2.63243200 |
| H | 0.14109400  | 2.86867600  | -1.46309000 |
| H | 2.92708500  | 0.47925000  | -3.67298100 |
| H | 6.99026300  | 2.49174800  | 0.15943400  |
| C | 7.01349200  | 2.31446600  | 2.29681300  |
| H | 8.08607500  | 2.51132400  | 2.39014100  |
| H | 6.47984400  | 3.25473300  | 2.46875700  |
| H | 6.72259500  | 1.59829500  | 3.06780500  |
| C | 7.49660900  | 0.47728100  | 0.60611100  |
| H | 7.31945900  | -0.28790000 | 1.35946500  |
| H | 7.23704900  | 0.07122100  | -0.37436600 |
| H | 8.56202500  | 0.72941900  | 0.59333700  |
| O | 0.41272200  | 1.04010000  | -3.37612200 |
| H | -0.04317700 | 0.43972400  | -2.74429500 |
| H | 2.41132300  | 1.36134500  | 1.00720100  |
| H | 1.95708600  | 3.56598800  | 0.05337100  |
| C | 5.19439600  | 1.10440300  | -2.31318900 |
| H | 5.25974500  | 0.70690500  | -3.32908600 |
| H | 5.91875100  | 1.92066000  | -2.22332000 |
| H | 5.51412400  | 0.32174300  | -1.62149900 |
| N | 2.15525400  | -0.69426300 | 3.23809500  |
| N | 2.55569500  | -0.09327500 | 2.37639700  |

## TSH

|                                              |                             |
|----------------------------------------------|-----------------------------|
| Zero-point correction=                       | 1.228471 (Hartree/Particle) |
| Thermal correction to Energy=                | 1.291248                    |
| Thermal correction to Enthalpy=              | 1.292113                    |
| Thermal correction to Gibbs Free Energy=     | 1.135692                    |
| Sum of electronic and zero-point Energies=   | -3547.472663                |
| Sum of electronic and thermal Energies=      | -3547.409887                |
| Sum of electronic and thermal Enthalpies=    | -3547.409022                |
| Sum of electronic and thermal Free Energies= | -3547.565442                |

|   |             |             |             |
|---|-------------|-------------|-------------|
| C | -3.79143900 | -0.32148500 | 0.50280900  |
| C | -4.93958900 | -0.12550600 | 1.34156700  |
| C | -4.51056400 | 2.30359400  | 1.29443200  |
| C | -3.35243300 | 2.11585600  | 0.57367800  |
| C | -3.38891600 | -1.66287900 | -0.00825200 |
| C | -4.26535900 | -2.50103900 | -0.77675900 |
| C | -3.79779800 | -3.78952400 | -1.19734400 |

|   |             |             |             |
|---|-------------|-------------|-------------|
| C | -2.46224300 | -4.18358200 | -0.91828600 |
| C | -1.58438200 | -3.34540700 | -0.26911400 |
| H | -4.81218000 | 3.30944600  | 1.56982800  |
| H | -2.12818800 | -5.15884200 | -1.25652700 |
| C | -2.46157800 | 3.24346800  | 0.15872000  |
| C | -1.57675200 | 3.83254800  | 1.08793800  |
| C | -2.49357600 | 3.69664600  | -1.17574900 |
| C | -0.78190200 | 4.90479400  | 0.67138800  |
| C | -1.68137300 | 4.77424400  | -1.54337000 |
| C | -0.82683800 | 5.39862300  | -0.63501200 |
| H | -0.11238700 | 5.36921500  | 1.38852600  |
| H | -1.71312800 | 5.13820600  | -2.56625000 |
| C | -0.13265800 | -3.63844800 | -0.04934900 |
| C | 0.78700100  | -3.56452800 | -1.12341400 |
| C | 0.33578600  | -3.86989400 | 1.26104700  |
| C | 2.16364100  | -3.66919600 | -0.84635900 |
| C | 1.71225000  | -3.98365500 | 1.49094300  |
| C | 2.64807500  | -3.87758500 | 0.46115300  |
| H | 2.86489900  | -3.68356200 | -1.67495400 |
| H | 2.06694400  | -4.17202800 | 2.50023900  |
| C | -5.30957200 | 1.20820600  | 1.71456000  |
| C | -6.81190200 | -0.97637100 | 2.64629700  |
| C | -7.20073800 | 0.34252700  | 2.97744900  |
| C | -6.45901100 | 1.40827300  | 2.52356900  |
| C | -5.71115800 | -1.20428500 | 1.85135500  |
| H | -7.38322300 | -1.81737400 | 3.02755500  |
| H | -8.07435500 | 0.50899800  | 3.60018800  |
| H | -6.73298500 | 2.42578600  | 2.78883300  |
| H | -5.41736600 | -2.21879700 | 1.61163900  |
| C | -5.93623500 | -4.22734600 | -2.27207200 |
| C | -6.38119500 | -2.93761400 | -1.90011700 |
| C | -5.56783900 | -2.09662000 | -1.17409100 |
| C | -4.66830100 | -4.63755600 | -1.93134400 |
| H | -6.59012600 | -4.88310600 | -2.83869300 |
| H | -7.37179900 | -2.60476800 | -2.19479200 |
| H | -5.91650800 | -1.10834400 | -0.90212100 |
| H | -4.30395700 | -5.61589000 | -2.23298600 |
| C | -3.01843400 | 0.78855500  | 0.19350000  |
| C | -2.09326700 | -2.10138100 | 0.20240400  |
| O | -1.22992000 | -1.29282200 | 0.91728600  |
| O | -1.88309800 | 0.63932800  | -0.57864300 |
| P | -0.53724500 | -0.04972400 | 0.08079500  |
| O | 0.15733100  | -0.60774400 | -1.15634200 |
| C | -0.62689800 | -4.05277600 | 2.42632100  |



|   |             |             |             |
|---|-------------|-------------|-------------|
| C | -0.37659300 | -3.05457800 | 3.56606900  |
| C | -0.57608600 | -5.50598400 | 2.93175000  |
| H | -1.63884000 | -3.87683800 | 2.05456700  |
| H | -0.42369900 | -2.02845800 | 3.19557900  |
| H | -1.13787500 | -3.17584600 | 4.34391700  |
| H | 0.60014900  | -3.21387600 | 4.03332600  |
| H | -0.79799600 | -6.21224100 | 2.12555800  |
| H | 0.41359200  | -5.75289500 | 3.33094100  |
| H | -1.30767500 | -5.65822700 | 3.73215500  |
| C | 4.12311500  | -4.12813300 | 0.73220500  |
| C | 5.06479400  | -3.11145000 | 0.07003700  |
| C | 4.48367100  | -5.56623200 | 0.31126300  |
| H | 4.26728300  | -4.05202900 | 1.81735900  |
| H | 4.89953600  | -2.10519500 | 0.46265500  |
| H | 6.10746700  | -3.37719200 | 0.27283200  |
| H | 4.93774100  | -3.09473100 | -1.01821300 |
| H | 3.83418100  | -6.29617500 | 0.80346300  |
| H | 4.36897400  | -5.69146600 | -0.77118700 |
| H | 5.52200800  | -5.79733100 | 0.57046100  |
| C | 0.32506400  | -3.44270700 | -2.56926600 |
| C | 0.18529000  | -4.85015500 | -3.18449300 |
| C | 1.23700300  | -2.58440800 | -3.45724800 |
| H | -0.65949400 | -2.96967700 | -2.55938800 |
| H | -0.47599300 | -5.48986600 | -2.59552500 |
| H | -0.21690800 | -4.78655700 | -4.20083100 |
| H | 1.16246400  | -5.34369800 | -3.23650400 |
| H | 1.34818600  | -1.57593700 | -3.05744100 |
| H | 2.22915800  | -3.03174600 | -3.58441500 |
| H | 0.79735500  | -2.49235000 | -4.45521400 |
| C | -3.41893000 | 3.06847000  | -2.20861100 |
| C | -2.70919100 | 2.77567800  | -3.53905900 |
| C | -4.66320000 | 3.94991700  | -2.41461800 |
| H | -3.76455700 | 2.11059200  | -1.81340200 |
| H | -1.80355200 | 2.18233600  | -3.38828700 |
| H | -3.37733800 | 2.21946800  | -4.20509700 |
| H | -2.42557400 | 3.69623100  | -4.06042300 |
| H | -5.20050400 | 4.09400900  | -1.47185500 |
| H | -4.38222700 | 4.93804700  | -2.79547500 |
| H | -5.35033400 | 3.49160300  | -3.13428700 |
| C | -1.49274000 | 3.34603800  | 2.52940400  |
| C | -2.34997200 | 4.23326100  | 3.44988500  |
| C | -0.04983000 | 3.26231900  | 3.04990700  |
| H | -1.89866100 | 2.33130800  | 2.55833200  |
| H | -3.39713700 | 4.24522500  | 3.13567500  |

|    |             |             |             |
|----|-------------|-------------|-------------|
| H  | -2.30954300 | 3.87253100  | 4.48348500  |
| H  | -1.98640800 | 5.26701600  | 3.43664500  |
| H  | 0.54758500  | 2.63536000  | 2.38712100  |
| H  | 0.41317200  | 4.25141800  | 3.13936600  |
| H  | -0.04316000 | 2.81150100  | 4.04819600  |
| C  | 0.01689000  | 6.58979300  | -1.05790300 |
| C  | 1.52253300  | 6.30867200  | -0.92688300 |
| C  | -0.37734500 | 7.85530900  | -0.27766700 |
| H  | -0.19344500 | 6.77342000  | -2.11932500 |
| H  | 1.81204000  | 5.43364100  | -1.51468200 |
| H  | 2.10861100  | 7.16762700  | -1.27156900 |
| H  | 1.79641500  | 6.11749100  | 0.11692800  |
| H  | -1.44337900 | 8.07224700  | -0.39393100 |
| H  | -0.17725300 | 7.73389300  | 0.79235300  |
| H  | 0.19172800  | 8.72313300  | -0.62847900 |
| O  | 0.18361700  | 0.78944700  | 1.07905300  |
| Ag | 2.36482600  | -1.03771300 | -0.48809000 |
| C  | 3.23499900  | 0.42824900  | 0.86923600  |
| C  | 4.67508200  | 0.62894400  | 1.25197500  |
| C  | 6.76683300  | 1.90755800  | 1.06356400  |
| O  | 5.22915600  | -0.20312900 | 1.98243400  |
| N  | 5.34274600  | 1.68391600  | 0.69920000  |
| C  | 4.63817200  | 2.78277800  | 0.01406300  |
| H  | 5.40602400  | 3.34159000  | -0.53006200 |
| H  | 4.20444000  | 3.47569700  | 0.74775000  |
| C  | 3.56289500  | 2.32322800  | -0.93621600 |
| C  | 2.24453900  | 2.77031200  | -0.75288800 |
| C  | 3.86463200  | 1.49613700  | -2.04551400 |
| C  | 1.21154400  | 2.35596500  | -1.58026700 |
| C  | 2.81741300  | 1.07560500  | -2.86707400 |
| C  | 1.49423700  | 1.46065800  | -2.61574000 |
| H  | 0.19190200  | 2.67140300  | -1.39527300 |
| H  | 3.00766700  | 0.40369200  | -3.69832900 |
| H  | 7.06132000  | 2.77703600  | 0.46724900  |
| C  | 6.91661800  | 2.27703900  | 2.54387400  |
| H  | 7.95473100  | 2.54962100  | 2.75841600  |
| H  | 6.28177100  | 3.13175900  | 2.79841700  |
| H  | 6.63819800  | 1.43160100  | 3.17480900  |
| C  | 7.67399200  | 0.74336300  | 0.65176900  |
| H  | 7.44678500  | -0.15106300 | 1.23040700  |
| H  | 7.55661000  | 0.51617200  | -0.41109000 |
| H  | 8.71793500  | 1.02354700  | 0.82494900  |
| O  | 0.49253000  | 0.89830900  | -3.35328500 |
| H  | -0.00514100 | 0.35299800  | -2.70082200 |

|   |            |             |             |
|---|------------|-------------|-------------|
| H | 2.49033400 | 1.17951600  | 1.11785100  |
| H | 2.01123200 | 3.41692500  | 0.08747100  |
| C | 5.26625800 | 1.01578600  | -2.32314000 |
| H | 5.33972300 | 0.60846200  | -3.33436700 |
| H | 6.00133300 | 1.82201900  | -2.22830000 |
| H | 5.56316400 | 0.23165800  | -1.61908300 |
| N | 2.39546400 | -1.24561800 | 3.24313300  |
| N | 2.74267900 | -0.53238500 | 2.47294800  |

## CPJ

|                                              |                             |
|----------------------------------------------|-----------------------------|
| Zero-point correction=                       | 1.219781 (Hartree/Particle) |
| Thermal correction to Energy=                | 1.279223                    |
| Thermal correction to Enthalpy=              | 1.280088                    |
| Thermal correction to Gibbs Free Energy=     | 1.130851                    |
| Sum of electronic and zero-point Energies=   | -3438.024932                |
| Sum of electronic and thermal Energies=      | -3437.965489                |
| Sum of electronic and thermal Enthalpies=    | -3437.964624                |
| Sum of electronic and thermal Free Energies= | -3438.113861                |

|   |             |             |             |
|---|-------------|-------------|-------------|
| C | -2.63744000 | -2.58693800 | -0.23278100 |
| C | -2.97756100 | -3.80197000 | -0.91767000 |
| C | -0.62989700 | -4.51695400 | -0.72041600 |
| C | -0.26721400 | -3.30465900 | -0.17147100 |
| C | -3.66519300 | -1.57835900 | 0.14454400  |
| C | -4.82175800 | -1.91898400 | 0.92672600  |
| C | -5.79942300 | -0.90531500 | 1.19170200  |
| C | -5.56645800 | 0.42632700  | 0.76242700  |
| C | -4.40460900 | 0.78770300  | 0.11628900  |
| H | 0.13088000  | -5.27407400 | -0.88240900 |
| H | -6.30293700 | 1.18779800  | 0.99851100  |
| C | 1.15718000  | -2.99195900 | 0.15229000  |
| C | 2.11443900  | -2.90608400 | -0.88939400 |
| C | 1.56435000  | -2.81505100 | 1.49208000  |
| C | 3.45585700  | -2.68912400 | -0.55620500 |
| C | 2.92084200  | -2.61624800 | 1.77218400  |
| C | 3.88721800  | -2.57222800 | 0.76847700  |
| H | 4.19445800  | -2.60723600 | -1.34759800 |
| H | 3.22399600  | -2.51456600 | 2.80874500  |
| C | -4.03687700 | 2.20647700  | -0.16778000 |
| C | -3.71700300 | 3.06901600  | 0.90855000  |
| C | -3.93053800 | 2.66574900  | -1.49584200 |
| C | -3.30306500 | 4.37158100  | 0.62373600  |
| C | -3.50659700 | 3.97791200  | -1.72670800 |

|   |             |             |             |
|---|-------------|-------------|-------------|
| C | -3.17916700 | 4.84317600  | -0.68485700 |
| H | -3.05221500 | 5.03236800  | 1.44745900  |
| H | -3.42145800 | 4.33456200  | -2.74970100 |
| C | -1.95932700 | -4.78646400 | -1.12971000 |
| C | -4.56649500 | -5.24328400 | -2.06870400 |
| C | -3.57060100 | -6.23425700 | -2.23553400 |
| C | -2.29402700 | -6.00445900 | -1.77933600 |
| C | -4.27858700 | -4.05971100 | -1.42761500 |
| H | -5.56614700 | -5.41516900 | -2.45596400 |
| H | -3.81342500 | -7.16594900 | -2.73716000 |
| H | -1.51247800 | -6.74553100 | -1.92264200 |
| H | -5.04678000 | -3.30515700 | -1.31390200 |
| C | -7.14708000 | -2.50907900 | 2.42876100  |
| C | -6.15826800 | -3.49693500 | 2.21315500  |
| C | -5.02630000 | -3.20994100 | 1.48380100  |
| C | -6.96376300 | -1.23958100 | 1.93292000  |
| H | -8.03859700 | -2.75091700 | 2.99919900  |
| H | -6.28973100 | -4.49006400 | 2.63184800  |
| H | -4.27380600 | -3.97357900 | 1.33410500  |
| H | -7.70076100 | -0.46220300 | 2.11486200  |
| C | -1.30101200 | -2.35895300 | 0.06135700  |
| C | -3.49167800 | -0.25159400 | -0.20850800 |
| O | -2.37143500 | 0.10238800  | -0.95198500 |
| O | -0.93139200 | -1.16984100 | 0.67575600  |
| P | -0.94170700 | 0.21564700  | -0.18552700 |
| O | -0.94998700 | 1.28783600  | 0.89629900  |
| C | -4.29421400 | 1.78963700  | -2.68656600 |
| C | -3.13425900 | 1.66277300  | -3.68758200 |
| C | -5.57025000 | 2.31134900  | -3.37057800 |
| H | -4.51679700 | 0.78607500  | -2.31562400 |
| H | -2.23516300 | 1.28807000  | -3.19360600 |
| H | -3.40178400 | 0.96817200  | -4.49122800 |
| H | -2.89845800 | 2.62686200  | -4.15088000 |
| H | -6.40453900 | 2.35720800  | -2.66342000 |
| H | -5.41858400 | 3.31859900  | -3.77331400 |
| H | -5.85894600 | 1.65737400  | -4.20061400 |
| C | -2.68120800 | 6.24948700  | -0.96733400 |
| C | -1.23219000 | 6.43177200  | -0.48352700 |
| C | -3.60709500 | 7.31619700  | -0.36042300 |
| H | -2.68802600 | 6.38259000  | -2.05694600 |
| H | -0.57930700 | 5.66868700  | -0.91502000 |
| H | -0.85265300 | 7.42268200  | -0.75679400 |
| H | -1.16888200 | 6.33454800  | 0.60546800  |
| H | -4.63205200 | 7.20222800  | -0.72614000 |

|    |             |             |             |
|----|-------------|-------------|-------------|
| H  | -3.63244500 | 7.23938000  | 0.73186700  |
| H  | -3.26034700 | 8.32353000  | -0.61544900 |
| C  | -3.82061600 | 2.63427200  | 2.36707000  |
| C  | -5.09069500 | 3.21981900  | 3.01085100  |
| C  | -2.58088600 | 3.00245400  | 3.19789400  |
| H  | -3.90384300 | 1.54557100  | 2.39061400  |
| H  | -5.99078700 | 2.92994000  | 2.46084300  |
| H  | -5.19702300 | 2.87585500  | 4.04552800  |
| H  | -5.04971200 | 4.31466800  | 3.01993600  |
| H  | -1.68369300 | 2.56834800  | 2.75534800  |
| H  | -2.44500300 | 4.08606800  | 3.27780500  |
| H  | -2.68698100 | 2.61184600  | 4.21574700  |
| C  | 0.59367800  | -2.89029200 | 2.66381100  |
| C  | 0.57510800  | -1.57693300 | 3.46467900  |
| C  | 0.91125600  | -4.09434200 | 3.56775200  |
| H  | -0.41281900 | -3.04547200 | 2.27116800  |
| H  | 0.30698100  | -0.73722400 | 2.81986900  |
| H  | -0.15952900 | -1.63438400 | 4.27509000  |
| H  | 1.55278700  | -1.37496000 | 3.91701600  |
| H  | 0.89258200  | -5.02802400 | 2.99699200  |
| H  | 1.90244100  | -4.00247700 | 4.02438000  |
| H  | 0.17659100  | -4.17225200 | 4.37639800  |
| C  | 1.74966400  | -3.08459300 | -2.36090600 |
| C  | 2.32763100  | -4.40631400 | -2.89920200 |
| C  | 2.19896900  | -1.90423500 | -3.23818500 |
| H  | 0.66209000  | -3.14175000 | -2.43857600 |
| H  | 1.99985500  | -5.26079900 | -2.29909800 |
| H  | 2.01038700  | -4.57370500 | -3.93394300 |
| H  | 3.42260900  | -4.39036000 | -2.88008100 |
| H  | 1.66858100  | -0.98957900 | -2.95561300 |
| H  | 3.27500000  | -1.71991000 | -3.16413400 |
| H  | 1.96417600  | -2.10644900 | -4.28902500 |
| C  | 5.37622800  | -2.47803200 | 1.06134100  |
| C  | 5.99708400  | -3.88830000 | 1.04081800  |
| C  | 5.71624600  | -1.77020400 | 2.37865400  |
| H  | 5.82294700  | -1.90466300 | 0.24267700  |
| H  | 5.80556900  | -4.38655100 | 0.08618200  |
| H  | 7.08136600  | -3.84031600 | 1.19095800  |
| H  | 5.56874100  | -4.51007400 | 1.83514900  |
| H  | 5.26915200  | -0.77191300 | 2.43048400  |
| H  | 5.36840000  | -2.33871900 | 3.24796300  |
| H  | 6.80024800  | -1.65877500 | 2.47611200  |
| O  | 0.08635500  | 0.25102800  | -1.29205000 |
| Ag | 2.21902700  | 0.40089400  | -0.87168200 |

|   |             |             |             |
|---|-------------|-------------|-------------|
| C | 4.04605300  | 0.87268800  | 0.09114700  |
| C | 5.44249000  | 0.74909300  | -0.44355400 |
| C | 7.71527600  | 1.71494600  | 0.03729800  |
| O | 5.83602500  | -0.08531700 | -1.25788600 |
| N | 6.25172900  | 1.69051100  | 0.16112900  |
| C | 5.57025600  | 2.38709900  | 1.23832100  |
| H | 5.93199000  | 3.41736400  | 1.32674300  |
| H | 5.72646200  | 1.89362900  | 2.21019500  |
| C | 4.07779300  | 2.30852200  | 0.84530300  |
| C | 3.11981500  | 2.10041900  | 1.94874000  |
| C | 3.66295600  | 3.37063700  | -0.13342900 |
| C | 1.80917100  | 2.41443400  | 1.82299800  |
| C | 2.37710300  | 3.80487200  | -0.15442700 |
| C | 1.38873200  | 3.19788600  | 0.68687500  |
| H | 1.06037800  | 2.08728700  | 2.53405800  |
| H | 2.02096000  | 4.49023800  | -0.91602600 |
| H | 8.03912700  | 2.58210100  | 0.62602500  |
| C | 8.34562600  | 0.45362600  | 0.64116900  |
| H | 9.43773200  | 0.51585300  | 0.60459700  |
| H | 8.04519300  | 0.32860300  | 1.68593600  |
| H | 8.02532000  | -0.42605200 | 0.07865900  |
| C | 8.14269500  | 1.93746400  | -1.41718100 |
| H | 7.81267800  | 1.10314900  | -2.03744800 |
| H | 7.70658000  | 2.85981900  | -1.81220000 |
| H | 9.23238200  | 2.01869300  | -1.47827100 |
| O | 0.15046500  | 3.37035000  | 0.39112400  |
| H | -0.44594400 | 2.48491500  | 0.67677700  |
| H | 3.97519800  | 0.10004300  | 0.86893200  |
| H | 3.46092300  | 1.50853000  | 2.79387800  |
| C | 4.61561300  | 3.83034600  | -1.19437000 |
| H | 5.57702900  | 4.14702500  | -0.78122000 |
| H | 4.82646900  | 3.00434500  | -1.88277800 |
| H | 4.18452300  | 4.65423100  | -1.76685100 |

## TSK

|                                              |                             |
|----------------------------------------------|-----------------------------|
| Zero-point correction=                       | 1.221439 (Hartree/Particle) |
| Thermal correction to Energy=                | 1.281498                    |
| Thermal correction to Enthalpy=              | 1.282363                    |
| Thermal correction to Gibbs Free Energy=     | 1.131027                    |
| Sum of electronic and zero-point Energies=   | -3437.986868                |
| Sum of electronic and thermal Energies=      | -3437.926810                |
| Sum of electronic and thermal Enthalpies=    | -3437.925945                |
| Sum of electronic and thermal Free Energies= | -3438.077281                |

|   |             |             |             |
|---|-------------|-------------|-------------|
| C | -2.70793600 | -2.52521700 | -0.27986700 |
| C | -3.09754200 | -3.72616700 | -0.96257600 |
| C | -0.78144000 | -4.53885000 | -0.76271200 |
| C | -0.37134900 | -3.34266900 | -0.21256200 |
| C | -3.69396100 | -1.48454600 | 0.12184000  |
| C | -4.84545500 | -1.79415900 | 0.92490100  |
| C | -5.77837200 | -0.74920100 | 1.22775500  |
| C | -5.50606200 | 0.57953400  | 0.81237800  |
| C | -4.34722200 | 0.90637100  | 0.14382500  |
| H | -0.05482900 | -5.33098800 | -0.91468500 |
| H | -6.20963100 | 1.36351100  | 1.07377000  |
| C | 1.05809900  | -3.09867300 | 0.14843100  |
| C | 2.04574500  | -3.05788700 | -0.86542900 |
| C | 1.43819400  | -2.94778700 | 1.50045800  |
| C | 3.38745000  | -2.92010000 | -0.49579400 |
| C | 2.79556400  | -2.82028100 | 1.81759100  |
| C | 3.78981200  | -2.82686500 | 0.83868700  |
| H | 4.14861500  | -2.87662700 | -1.26744800 |
| H | 3.07702400  | -2.74090200 | 2.86288600  |
| C | -3.93799300 | 2.31360300  | -0.14297300 |
| C | -3.51919400 | 3.14599400  | 0.92234000  |
| C | -3.89215300 | 2.78595700  | -1.46917900 |
| C | -3.07134900 | 4.43532700  | 0.62912100  |
| C | -3.43642400 | 4.08575100  | -1.70938200 |
| C | -3.01366000 | 4.92252700  | -0.67852400 |
| H | -2.73864100 | 5.07084100  | 1.44322900  |
| H | -3.40011700 | 4.45411900  | -2.73130700 |
| C | -2.11993600 | -4.75059600 | -1.17811900 |
| C | -4.74719900 | -5.10248900 | -2.10792300 |
| C | -3.79150000 | -6.13123800 | -2.28094000 |
| C | -2.50517500 | -5.95293100 | -1.82863200 |
| C | -4.41011700 | -3.93232000 | -1.46610800 |
| H | -5.75463700 | -5.23458600 | -2.49070800 |
| H | -4.07264900 | -7.05176300 | -2.78326100 |
| H | -1.75450000 | -6.72478200 | -1.97509100 |
| H | -5.14712300 | -3.14791700 | -1.34656300 |
| C | -7.15799200 | -2.32075700 | 2.47147300  |
| C | -6.21207600 | -3.34107700 | 2.21864500  |
| C | -5.08656500 | -3.08495300 | 1.46797000  |
| C | -6.93753400 | -1.05144500 | 1.99035100  |
| H | -8.04513600 | -2.53789100 | 3.05851600  |
| H | -6.37119000 | -4.33516900 | 2.62545000  |
| H | -4.36705600 | -3.87394800 | 1.29069000  |

|   |             |             |             |
|---|-------------|-------------|-------------|
| H | -7.64024000 | -0.24977000 | 2.20061700  |
| C | -1.36169200 | -2.34764200 | 0.00549900  |
| C | -3.47886200 | -0.15959900 | -0.21625300 |
| O | -2.36867400 | 0.16537200  | -0.98232100 |
| O | -0.93930700 | -1.17456000 | 0.60345400  |
| P | -0.90947700 | 0.22194500  | -0.25777600 |
| O | -0.78959900 | 1.28738600  | 0.80078600  |
| C | -4.34530700 | 1.93375600  | -2.64637500 |
| C | -3.23159500 | 1.75975900  | -3.69198300 |
| C | -5.62282600 | 2.51387200  | -3.27795100 |
| H | -4.59700100 | 0.93934200  | -2.26885200 |
| H | -2.33445400 | 1.33770100  | -3.23390500 |
| H | -3.56201000 | 1.08633900  | -4.49042600 |
| H | -2.96661400 | 2.71617800  | -4.15559100 |
| H | -6.42537900 | 2.59422800  | -2.53785900 |
| H | -5.44317700 | 3.51484400  | -3.68489300 |
| H | -5.97340000 | 1.87643700  | -4.09705400 |
| C | -2.47532700 | 6.31104100  | -0.97647800 |
| C | -0.96709300 | 6.39043200  | -0.68085100 |
| C | -3.24610200 | 7.40483500  | -0.22020100 |
| H | -2.61458800 | 6.48870300  | -2.05089400 |
| H | -0.42120200 | 5.62875900  | -1.24411300 |
| H | -0.57179400 | 7.37895000  | -0.94213100 |
| H | -0.76712400 | 6.20752100  | 0.37939200  |
| H | -4.31658900 | 7.35772000  | -0.44196400 |
| H | -3.12478400 | 7.29708600  | 0.86284400  |
| H | -2.88046900 | 8.39964100  | -0.49725200 |
| C | -3.55844100 | 2.68921700  | 2.37700200  |
| C | -4.79069200 | 3.27816400  | 3.08807500  |
| C | -2.27892300 | 3.02973800  | 3.15713000  |
| H | -3.65380800 | 1.60093600  | 2.38518300  |
| H | -5.71928000 | 3.00556000  | 2.57839700  |
| H | -4.85137500 | 2.92096100  | 4.12206100  |
| H | -4.73616000 | 4.37234400  | 3.10978200  |
| H | -1.40518500 | 2.60823600  | 2.66046700  |
| H | -2.13605000 | 4.11039800  | 3.26206700  |
| H | -2.34040400 | 2.61072900  | 4.16754000  |
| C | 0.43254800  | -2.97541000 | 2.64463900  |
| C | 0.44379500  | -1.65638000 | 3.43632600  |
| C | 0.67360900  | -4.18490600 | 3.56475600  |
| H | -0.56752300 | -3.09189900 | 2.22341000  |
| H | 0.21041500  | -0.81429700 | 2.78096500  |
| H | -0.30578100 | -1.68359100 | 4.23450800  |
| H | 1.41984800  | -1.48328600 | 3.90432600  |



|    |             |             |             |
|----|-------------|-------------|-------------|
| H  | 0.63700200  | -5.12096000 | 2.99875300  |
| H  | 1.65185600  | -4.12903500 | 4.05409600  |
| H  | -0.08971300 | -4.22859700 | 4.34898300  |
| C  | 1.71013300  | -3.19717800 | -2.34747700 |
| C  | 2.22790800  | -4.54083600 | -2.89218100 |
| C  | 2.24756400  | -2.02891500 | -3.19096700 |
| H  | 0.62336400  | -3.19196700 | -2.45281600 |
| H  | 1.83528900  | -5.38433800 | -2.31594800 |
| H  | 1.93075800  | -4.67394600 | -3.93781100 |
| H  | 3.32119100  | -4.58808700 | -2.84341100 |
| H  | 1.75238400  | -1.09450200 | -2.91105200 |
| H  | 3.32774400  | -1.89847900 | -3.07485100 |
| H  | 2.03998600  | -2.20450300 | -4.25224900 |
| C  | 5.27345600  | -2.82464900 | 1.17293000  |
| C  | 5.76883900  | -4.27511500 | 1.32904800  |
| C  | 5.64473400  | -2.00158900 | 2.41374100  |
| H  | 5.78516000  | -2.37844000 | 0.31466900  |
| H  | 5.55461600  | -4.85973000 | 0.42969200  |
| H  | 6.84936500  | -4.30431500 | 1.50911100  |
| H  | 5.26888900  | -4.76480200 | 2.17231400  |
| H  | 5.30106100  | -0.96546000 | 2.33182000  |
| H  | 5.21706800  | -2.42534400 | 3.32864100  |
| H  | 6.73195700  | -1.98301000 | 2.54126300  |
| O  | 0.06850100  | 0.16586000  | -1.42114900 |
| Ag | 2.12149800  | 0.35669300  | -0.81326500 |
| C  | 3.85405700  | 0.61302200  | 0.35877900  |
| C  | 5.21771400  | 0.56704800  | -0.24474100 |
| C  | 7.54838900  | 1.38243700  | -0.49301300 |
| O  | 5.44884600  | -0.40117400 | -0.97952800 |
| N  | 6.16012700  | 1.53561900  | -0.00176000 |
| C  | 5.91005600  | 2.49432700  | 1.07041500  |
| H  | 6.54125300  | 3.37047800  | 0.91034600  |
| H  | 6.16454100  | 2.07894700  | 2.05663600  |
| C  | 4.45718900  | 2.86174100  | 1.00773300  |
| C  | 3.53758600  | 1.94888000  | 1.61507200  |
| C  | 3.98397000  | 3.89514900  | 0.19368100  |
| C  | 2.12686600  | 2.20792200  | 1.54887600  |
| C  | 2.60355400  | 4.07529100  | 0.10152800  |
| C  | 1.65394600  | 3.24588300  | 0.74761600  |
| H  | 1.42788300  | 1.55085500  | 2.05355000  |
| H  | 2.20431300  | 4.86539800  | -0.52817500 |
| H  | 8.06314400  | 2.28388700  | -0.14087600 |
| C  | 8.23914100  | 0.16459300  | 0.13292700  |
| H  | 9.29469000  | 0.14177400  | -0.15530200 |

|   |             |             |             |
|---|-------------|-------------|-------------|
| H | 8.18549800  | 0.20309000  | 1.22577800  |
| H | 7.76180200  | -0.75515100 | -0.20799900 |
| C | 7.60954200  | 1.37689300  | -2.02280300 |
| H | 7.11371200  | 0.49226600  | -2.42217800 |
| H | 7.11991400  | 2.26651000  | -2.43111100 |
| H | 8.65414300  | 1.37949700  | -2.34966000 |
| O | 0.37024300  | 3.51451500  | 0.53098800  |
| H | -0.18771200 | 2.67374300  | 0.65043900  |
| H | 3.75566800  | -0.23033800 | 1.04488100  |
| H | 3.88698500  | 1.43194500  | 2.50663100  |
| C | 4.92404700  | 4.77108600  | -0.59702500 |
| H | 5.59477100  | 5.34105900  | 0.05524900  |
| H | 5.54659700  | 4.16465900  | -1.26310900 |
| H | 4.36896200  | 5.48466900  | -1.20892300 |

### CPK

|                                              |                             |
|----------------------------------------------|-----------------------------|
| Zero-point correction=                       | 1.339761 (Hartree/Particle) |
| Thermal correction to Energy=                | 1.406425                    |
| Thermal correction to Enthalpy=              | 1.407290                    |
| Thermal correction to Gibbs Free Energy=     | 1.245069                    |
| Sum of electronic and zero-point Energies=   | -3858.734578                |
| Sum of electronic and thermal Energies=      | -3858.667914                |
| Sum of electronic and thermal Enthalpies=    | -3858.667049                |
| Sum of electronic and thermal Free Energies= | -3858.829270                |

|   |             |             |             |
|---|-------------|-------------|-------------|
| C | -2.45297700 | 2.91037100  | -0.92212700 |
| C | -3.31620100 | 3.49400600  | -1.90588000 |
| C | -4.82581200 | 1.58322500  | -1.63301800 |
| C | -3.92719300 | 0.93863000  | -0.80509700 |
| C | -1.32780100 | 3.66344500  | -0.31989000 |
| C | -1.54728200 | 4.94449300  | 0.29913000  |
| C | -0.43517800 | 5.61992500  | 0.89442000  |
| C | 0.79894800  | 4.93755000  | 1.01250600  |
| C | 0.97223500  | 3.65084400  | 0.55073000  |
| H | -5.76350400 | 1.09089600  | -1.87202800 |
| H | 1.60860600  | 5.40930400  | 1.56092500  |
| C | -4.22445100 | -0.43957400 | -0.32284500 |
| C | -4.38438500 | -1.48047000 | -1.26302500 |
| C | -4.40875100 | -0.70149300 | 1.05486800  |
| C | -4.73192900 | -2.75855300 | -0.80705100 |
| C | -4.75704900 | -1.99053200 | 1.45474200  |
| C | -4.93154100 | -3.03638000 | 0.54301500  |
| H | -4.84683700 | -3.55152900 | -1.53678300 |

|   |             |             |             |
|---|-------------|-------------|-------------|
| H | -4.90321300 | -2.19332000 | 2.51237600  |
| C | 2.14341900  | 2.85785000  | 1.02592600  |
| C | 2.05576800  | 2.27061200  | 2.31182500  |
| C | 3.31306200  | 2.73116400  | 0.26114900  |
| C | 3.16961500  | 1.59296200  | 2.80410600  |
| C | 4.39952300  | 2.01438300  | 0.78657800  |
| C | 4.34909300  | 1.45192200  | 2.06422800  |
| H | 3.12592400  | 1.15345200  | 3.79646800  |
| H | 5.28420300  | 1.88071300  | 0.17925100  |
| C | -4.53721700 | 2.82934800  | -2.23704700 |
| C | -3.86194900 | 5.23928200  | -3.51046800 |
| C | -5.09125900 | 4.60196400  | -3.80521400 |
| C | -5.41756000 | 3.42020800  | -3.18264800 |
| C | -2.99837500 | 4.70184200  | -2.58346800 |
| H | -3.59642500 | 6.15815200  | -4.02429900 |
| H | -5.76630400 | 5.04155800  | -4.53315900 |
| H | -6.34701200 | 2.90803400  | -3.41597800 |
| H | -2.05773000 | 5.19314800  | -2.36517600 |
| C | -1.85447600 | 7.50479300  | 1.47873400  |
| C | -2.97045100 | 6.81127400  | 0.95577500  |
| C | -2.82335500 | 5.56633400  | 0.38635200  |
| C | -0.61462800 | 6.91149500  | 1.45661900  |
| H | -1.98431000 | 8.48986400  | 1.91640400  |
| H | -3.95708700 | 7.26140300  | 1.01016600  |
| H | -3.69326700 | 5.04978400  | 0.00451900  |
| H | 0.24780000  | 7.41029200  | 1.89028600  |
| C | -2.72919500 | 1.62633700  | -0.46797100 |
| C | -0.07909800 | 3.07318600  | -0.21325100 |
| O | 0.15370800  | 1.86983800  | -0.88125500 |
| O | -1.83673200 | 1.00332900  | 0.40475600  |
| P | -0.41005800 | 0.46809400  | -0.23006100 |
| O | 0.48179000  | 0.04245400  | 0.92027100  |
| O | -0.67336200 | -0.53728600 | -1.33547800 |
| C | 3.43148800  | 3.39562200  | -1.10296300 |
| C | 3.59894300  | 2.36841400  | -2.23279200 |
| C | 4.57376000  | 4.42521700  | -1.11529600 |
| H | 2.49909300  | 3.93835100  | -1.28727200 |
| H | 2.73229200  | 1.70158500  | -2.26736200 |
| H | 3.67974900  | 2.87532100  | -3.20115400 |
| H | 4.49943400  | 1.76507300  | -2.08243700 |
| H | 4.43976300  | 5.17047300  | -0.32478400 |
| H | 5.54306000  | 3.94075900  | -0.95857300 |
| H | 4.61138600  | 4.94826200  | -2.07705100 |
| C | 5.50379900  | 0.67447400  | 2.67863400  |

|   |             |             |             |
|---|-------------|-------------|-------------|
| C | 6.88082500  | 1.09057800  | 2.14890300  |
| C | 5.28411000  | -0.84100900 | 2.50825100  |
| H | 5.48049600  | 0.88515600  | 3.75694500  |
| H | 7.04284900  | 2.16617600  | 2.27173900  |
| H | 7.67077800  | 0.56342600  | 2.69467000  |
| H | 6.98019300  | 0.84575800  | 1.08905300  |
| H | 4.31393500  | -1.14567800 | 2.91382500  |
| H | 5.31226300  | -1.10254600 | 1.44860200  |
| H | 6.06713300  | -1.41054400 | 3.02178000  |
| C | 0.80407800  | 2.39060300  | 3.17600200  |
| C | 0.93910600  | 3.55873700  | 4.16999700  |
| C | 0.46216200  | 1.09381900  | 3.92629700  |
| H | -0.04009600 | 2.60604200  | 2.51553500  |
| H | 1.09834000  | 4.51004900  | 3.65698100  |
| H | 0.03449300  | 3.65097600  | 4.78097900  |
| H | 1.78780100  | 3.39254200  | 4.84308100  |
| H | 0.40391400  | 0.25587700  | 3.23027800  |
| H | 1.20058600  | 0.86459500  | 4.70275000  |
| H | -0.50629400 | 1.20274500  | 4.42557600  |
| C | -4.30324400 | 0.38935600  | 2.11304800  |
| C | -3.20810800 | 0.08113100  | 3.14612700  |
| C | -5.66340700 | 0.62658300  | 2.79188600  |
| H | -4.02762000 | 1.32260200  | 1.61855100  |
| H | -2.24334800 | -0.05805200 | 2.65450700  |
| H | -3.11021600 | 0.90849100  | 3.85723000  |
| H | -3.44708200 | -0.82061600 | 3.72161100  |
| H | -6.43105500 | 0.87938400  | 2.05386900  |
| H | -6.00071200 | -0.26462000 | 3.33188500  |
| H | -5.59567000 | 1.44915300  | 3.51208500  |
| C | -4.20148500 | -1.28510200 | -2.76538600 |
| C | -5.50868300 | -1.56883200 | -3.52462800 |
| C | -3.04059500 | -2.12913500 | -3.30859300 |
| H | -3.93761200 | -0.24313500 | -2.94823200 |
| H | -6.33045600 | -0.94940600 | -3.15043600 |
| H | -5.38365200 | -1.36165600 | -4.59281900 |
| H | -5.81314200 | -2.61584200 | -3.42168000 |
| H | -2.09981700 | -1.79731400 | -2.86871400 |
| H | -3.17444500 | -3.19423700 | -3.09327800 |
| H | -2.96175500 | -2.01560000 | -4.39551400 |
| C | -5.36579200 | -4.40350300 | 1.04939600  |
| C | -5.16262500 | -5.53348100 | 0.03438300  |
| C | -6.83438000 | -4.35734400 | 1.51249400  |
| H | -4.74951000 | -4.62890200 | 1.92871500  |
| H | -4.14679500 | -5.53624600 | -0.36878100 |

|    |             |             |             |
|----|-------------|-------------|-------------|
| H  | -5.34618400 | -6.50307900 | 0.50761500  |
| H  | -5.85899300 | -5.44167200 | -0.80664400 |
| H  | -6.98788200 | -3.58964000 | 2.27633900  |
| H  | -7.49362200 | -4.12452000 | 0.66908000  |
| H  | -7.14228900 | -5.32234300 | 1.93006400  |
| Ag | 2.48683400  | -0.40744500 | -0.00107700 |
| C  | 3.93095200  | -1.13101500 | -1.46568400 |
| C  | 5.38431300  | -1.08243200 | -1.16752400 |
| C  | 7.38221500  | -2.60427100 | -1.19770800 |
| O  | 6.04150900  | -0.07562900 | -0.89753400 |
| N  | 5.93179000  | -2.35636800 | -1.24408000 |
| C  | 5.10751300  | -3.23597400 | -2.04576400 |
| H  | 5.12682900  | -4.26103800 | -1.66241800 |
| H  | 5.46038200  | -3.27609700 | -3.08790200 |
| C  | 3.67430400  | -2.62061000 | -1.98745600 |
| C  | 3.06821300  | -2.47225800 | -3.33055500 |
| C  | 2.79360000  | -3.31453900 | -0.99458000 |
| C  | 1.77284000  | -2.73383900 | -3.60199800 |
| C  | 1.49488800  | -3.59890700 | -1.28855200 |
| C  | 0.94449100  | -3.29155000 | -2.57062900 |
| H  | 1.31804200  | -2.53908000 | -4.56592000 |
| H  | 0.85401900  | -4.06418900 | -0.55164900 |
| H  | 7.48542300  | -3.68971800 | -1.32179900 |
| C  | 8.11292900  | -1.90952600 | -2.35481900 |
| H  | 9.17365200  | -2.17889800 | -2.35292000 |
| H  | 7.69302100  | -2.20539400 | -3.32230900 |
| H  | 8.02235600  | -0.82649900 | -2.25214700 |
| C  | 7.96715300  | -2.23294900 | 0.16672800  |
| H  | 7.90393900  | -1.15769800 | 0.33168000  |
| H  | 7.42277000  | -2.73830800 | 0.96920500  |
| H  | 9.01764600  | -2.53670400 | 0.21425400  |
| O  | -0.28845200 | -3.52793700 | -2.86887300 |
| H  | -0.85712800 | -3.82904800 | -2.04600800 |
| H  | 3.70378000  | -0.40419600 | -2.24629700 |
| C  | -2.37609200 | -4.16286800 | 3.85486600  |
| C  | -2.07799400 | -3.52347300 | 2.65510000  |
| C  | -1.93566800 | -4.27853800 | 1.48321800  |
| C  | -2.06636600 | -5.67174100 | 1.52276200  |
| C  | -2.36259200 | -6.30717700 | 2.72576500  |
| C  | -2.52343700 | -5.55263000 | 3.89059800  |
| H  | -2.49506400 | -3.57827100 | 4.76169700  |
| H  | -1.96908800 | -2.44835000 | 2.60736700  |
| H  | -1.94224600 | -6.23567300 | 0.60573000  |
| H  | -2.47149100 | -7.38667400 | 2.75617700  |

|   |             |             |             |
|---|-------------|-------------|-------------|
| H | -2.76007000 | -6.04796100 | 4.82761400  |
| C | -1.63973800 | -3.61392600 | 0.19196500  |
| O | -1.54126700 | -4.28498100 | -0.85811900 |
| O | -1.45635400 | -2.33216800 | 0.28198300  |
| H | -1.18781100 | -1.77879500 | -0.54172000 |
| C | 3.36979400  | -3.68629200 | 0.33753000  |
| H | 3.95532200  | -4.61015900 | 0.24512400  |
| H | 4.04428700  | -2.91080700 | 0.70411000  |
| H | 2.58208500  | -3.85837900 | 1.07335500  |
| H | 3.71068700  | -2.04716000 | -4.09710300 |

## TSI

|                                              |                             |
|----------------------------------------------|-----------------------------|
| Zero-point correction=                       | 1.333735 (Hartree/Particle) |
| Thermal correction to Energy=                | 1.400010                    |
| Thermal correction to Enthalpy=              | 1.400875                    |
| Thermal correction to Gibbs Free Energy=     | 1.239823                    |
| Sum of electronic and zero-point Energies=   | -3858.734648                |
| Sum of electronic and thermal Energies=      | -3858.668372                |
| Sum of electronic and thermal Enthalpies=    | -3858.667507                |
| Sum of electronic and thermal Free Energies= | -3858.828559                |

|   |             |             |             |
|---|-------------|-------------|-------------|
| C | -2.59463800 | 2.80545000  | -0.93583600 |
| C | -3.48235700 | 3.33263800  | -1.93000900 |
| C | -4.90263800 | 1.35720700  | -1.62820600 |
| C | -3.97776200 | 0.76709700  | -0.78859900 |
| C | -1.49933600 | 3.61595200  | -0.35207100 |
| C | -1.76592200 | 4.89975400  | 0.24246400  |
| C | -0.67835400 | 5.62834800  | 0.82067100  |
| C | 0.58166000  | 4.99666500  | 0.94971300  |
| C | 0.80385900  | 3.70874500  | 0.51281200  |
| H | -5.81486500 | 0.81773100  | -1.86273000 |
| H | 1.37262100  | 5.50901200  | 1.48870600  |
| C | -4.19995300 | -0.61927000 | -0.29041400 |
| C | -4.30318100 | -1.67889700 | -1.21786800 |
| C | -4.36089700 | -0.87456900 | 1.09152200  |
| C | -4.56877200 | -2.96973500 | -0.74407300 |
| C | -4.62213000 | -2.17814000 | 1.50886100  |
| C | -4.73565100 | -3.24370700 | 0.61079600  |
| H | -4.64033000 | -3.77738400 | -1.46292300 |
| H | -4.74503500 | -2.37808100 | 2.56981900  |
| C | 1.99803500  | 2.96090300  | 1.00459400  |
| C | 1.92251600  | 2.39072900  | 2.29893300  |
| C | 3.17198300  | 2.85264300  | 0.24361300  |

|   |             |             |             |
|---|-------------|-------------|-------------|
| C | 3.05180700  | 1.74779800  | 2.80247500  |
| C | 4.27416600  | 2.16925900  | 0.78039300  |
| C | 4.23515100  | 1.62360600  | 2.06609600  |
| H | 3.01713000  | 1.32117500  | 3.80067300  |
| H | 5.16314200  | 2.04760300  | 0.17672900  |
| C | -4.67101400 | 2.60653300  | -2.25013500 |
| C | -4.10507800 | 5.02273500  | -3.56476000 |
| C | -5.30377400 | 4.32504400  | -3.84833700 |
| C | -5.57650400 | 3.14042400  | -3.20587900 |
| C | -3.21867300 | 4.54147200  | -2.62848900 |
| H | -3.88116600 | 5.94352200  | -4.09461200 |
| H | -5.99743500 | 4.72078700  | -4.58382400 |
| H | -6.48105400 | 2.58224300  | -3.43096800 |
| H | -2.30161700 | 5.07903100  | -2.41922800 |
| C | -2.16799000 | 7.46788400  | 1.37310300  |
| C | -3.25798500 | 6.72228500  | 0.86732300  |
| C | -3.06475500 | 5.47315400  | 0.32146500  |
| C | -0.90616600 | 6.92275000  | 1.35843600  |
| H | -2.33455300 | 8.45545500  | 1.79216900  |
| H | -4.26089800 | 7.13536600  | 0.91632700  |
| H | -3.91485600 | 4.91624100  | -0.04802600 |
| H | -0.06274400 | 7.46281700  | 1.77966300  |
| C | -2.81818300 | 1.51989100  | -0.45998200 |
| C | -0.22758000 | 3.08148800  | -0.23710700 |
| O | 0.05052700  | 1.86758500  | -0.88052200 |
| O | -1.89856200 | 0.95007600  | 0.43000200  |
| P | -0.45344300 | 0.48090700  | -0.18207400 |
| O | 0.45756000  | 0.06783500  | 0.94691600  |
| O | -0.67875500 | -0.54398200 | -1.30928900 |
| C | 3.27899600  | 3.50540300  | -1.12697500 |
| C | 3.50156700  | 2.47454300  | -2.24356200 |
| C | 4.37974900  | 4.57951200  | -1.13620500 |
| H | 2.32813900  | 4.00899900  | -1.32819300 |
| H | 2.66310300  | 1.77287500  | -2.28271100 |
| H | 3.57554000  | 2.97451400  | -3.21598700 |
| H | 4.42238700  | 1.90778000  | -2.07557000 |
| H | 4.20564900  | 5.32755700  | -0.35621000 |
| H | 5.36469600  | 4.13488600  | -0.96033800 |
| H | 4.41029400  | 5.09287200  | -2.10338500 |
| C | 5.40680500  | 0.88165800  | 2.69219300  |
| C | 6.77582700  | 1.33752900  | 2.17395500  |
| C | 5.23430100  | -0.63999700 | 2.52197800  |
| H | 5.36706000  | 1.09356100  | 3.76973500  |
| H | 6.90294700  | 2.41849700  | 2.29101700  |

|   |             |             |             |
|---|-------------|-------------|-------------|
| H | 7.57547600  | 0.83917000  | 2.73249200  |
| H | 6.89467300  | 1.08760000  | 1.11737200  |
| H | 4.27022700  | -0.97369700 | 2.91950900  |
| H | 5.28117800  | -0.90099000 | 1.46290900  |
| H | 6.02942900  | -1.18478100 | 3.04354900  |
| C | 0.66696200  | 2.49163000  | 3.16023700  |
| C | 0.76693000  | 3.68309500  | 4.13050700  |
| C | 0.36254500  | 1.20166500  | 3.93812100  |
| H | -0.18341800 | 2.66990000  | 2.49616800  |
| H | 0.89883300  | 4.62828900  | 3.59884600  |
| H | -0.14022300 | 3.76092600  | 4.73963600  |
| H | 1.61984700  | 3.55491100  | 4.80640000  |
| H | 0.33599000  | 0.34470700  | 3.26360800  |
| H | 1.10401300  | 1.01432600  | 4.72261000  |
| H | -0.61124800 | 1.29050300  | 4.43059700  |
| C | -4.33588000 | 0.23537700  | 2.13524800  |
| C | -3.24262500 | 0.01176500  | 3.19148200  |
| C | -5.71990100 | 0.39577300  | 2.78862400  |
| H | -4.11179600 | 1.17785700  | 1.63169300  |
| H | -2.25962300 | -0.05511200 | 2.72173600  |
| H | -3.22273100 | 0.84532800  | 3.90191700  |
| H | -3.42207800 | -0.90527200 | 3.76363300  |
| H | -6.48929200 | 0.58801200  | 2.03434500  |
| H | -6.00833300 | -0.50786300 | 3.33601400  |
| H | -5.71714000 | 1.23117400  | 3.49719500  |
| C | -4.15392300 | -1.49081600 | -2.72501900 |
| C | -5.47158300 | -1.81371500 | -3.45098800 |
| C | -2.98969100 | -2.31274900 | -3.29445700 |
| H | -3.92001600 | -0.44387500 | -2.92179900 |
| H | -6.30057100 | -1.21279900 | -3.06298200 |
| H | -5.37771600 | -1.61449600 | -4.52391200 |
| H | -5.74526900 | -2.86713200 | -3.32927200 |
| H | -2.04231600 | -1.96653300 | -2.88221700 |
| H | -3.09250700 | -3.37959000 | -3.07348600 |
| H | -2.94154300 | -2.20054400 | -4.38322600 |
| C | -5.06883900 | -4.63057500 | 1.13870300  |
| C | -4.80373500 | -5.75649000 | 0.13354600  |
| C | -6.52990000 | -4.67834500 | 1.62492100  |
| H | -4.42447000 | -4.80152600 | 2.00998300  |
| H | -3.79618900 | -5.69517100 | -0.28506200 |
| H | -4.91448800 | -6.73008200 | 0.62110500  |
| H | -5.51774900 | -5.72313200 | -0.69718400 |
| H | -6.72423600 | -3.91346000 | 2.38238600  |
| H | -7.21669900 | -4.50223400 | 0.78969800  |



|    |             |             |             |
|----|-------------|-------------|-------------|
| H  | -6.76438600 | -5.65670600 | 2.05866800  |
| Ag | 2.48576300  | -0.34263900 | -0.00099200 |
| C  | 3.94381700  | -1.01077000 | -1.47447900 |
| C  | 5.39238900  | -0.91118300 | -1.15960500 |
| C  | 7.44710000  | -2.35389600 | -1.20586100 |
| O  | 6.00737300  | 0.11130500  | -0.84946700 |
| N  | 5.99057500  | -2.15786700 | -1.27679300 |
| C  | 5.20927600  | -3.03291600 | -2.12580600 |
| H  | 5.28754500  | -4.07665800 | -1.80573300 |
| H  | 5.55348600  | -2.98985600 | -3.17079800 |
| C  | 3.74744200  | -2.49605400 | -2.01878700 |
| C  | 3.10590300  | -2.36078100 | -3.34963100 |
| C  | 2.93435000  | -3.28023600 | -1.02990400 |
| C  | 1.82843800  | -2.70327400 | -3.60654100 |
| C  | 1.65833600  | -3.65017800 | -1.31171200 |
| C  | 1.04850100  | -3.33683500 | -2.57449500 |
| H  | 1.34584800  | -2.51837200 | -4.55911200 |
| H  | 1.06750400  | -4.18611900 | -0.58068300 |
| H  | 7.59397500  | -3.42997000 | -1.36323200 |
| C  | 8.17757400  | -1.59381000 | -2.32128400 |
| H  | 9.24769600  | -1.82239500 | -2.30155800 |
| H  | 7.79233000  | -1.87337300 | -3.30777000 |
| H  | 8.04230300  | -0.51906200 | -2.18593900 |
| C  | 7.98540500  | -2.00713500 | 0.18439500  |
| H  | 7.87843100  | -0.94077900 | 0.38210600  |
| H  | 7.44033800  | -2.55823100 | 0.95590900  |
| H  | 9.04487400  | -2.27430400 | 0.24924200  |
| O  | -0.17167800 | -3.62137300 | -2.83573900 |
| H  | -0.74950200 | -3.98178000 | -1.95007200 |
| H  | 3.70401300  | -0.28253500 | -2.25055400 |
| C  | -2.00486200 | -3.97081700 | 3.84489700  |
| C  | -1.76888300 | -3.41381600 | 2.59145200  |
| C  | -1.63111900 | -4.24668800 | 1.47382500  |
| C  | -1.70229900 | -5.63661400 | 1.62146700  |
| C  | -1.93479500 | -6.19124800 | 2.87820900  |
| C  | -2.09275600 | -5.35878400 | 3.98892900  |
| H  | -2.12062500 | -3.32404400 | 4.70915100  |
| H  | -1.70305300 | -2.34256500 | 2.45602200  |
| H  | -1.58232600 | -6.26346400 | 0.74576200  |
| H  | -1.99634800 | -7.26909000 | 2.99200500  |
| H  | -2.27986000 | -5.79129800 | 4.96744300  |
| C  | -1.39581400 | -3.64975800 | 0.13143400  |
| O  | -1.33211100 | -4.42807700 | -0.86910300 |
| O  | -1.23023900 | -2.38903200 | 0.10574800  |

|   |             |             |             |
|---|-------------|-------------|-------------|
| H | -0.96803500 | -1.60882400 | -0.74378600 |
| C | 3.55041800  | -3.62294600 | 0.29208100  |
| H | 4.33044400  | -4.38363900 | 0.16939200  |
| H | 4.02891100  | -2.74472700 | 0.73188100  |
| H | 2.80115300  | -4.00742400 | 0.98649100  |
| H | 3.70548200  | -1.87742500 | -4.11670600 |

## CPL

|                                              |                             |
|----------------------------------------------|-----------------------------|
| Zero-point correction=                       | 1.340776 (Hartree/Particle) |
| Thermal correction to Energy=                | 1.407437                    |
| Thermal correction to Enthalpy=              | 1.408302                    |
| Thermal correction to Gibbs Free Energy=     | 1.246122                    |
| Sum of electronic and zero-point Energies=   | -3858.742627                |
| Sum of electronic and thermal Energies=      | -3858.675965                |
| Sum of electronic and thermal Enthalpies=    | -3858.675100                |
| Sum of electronic and thermal Free Energies= | -3858.837280                |

|   |             |             |             |
|---|-------------|-------------|-------------|
| C | -3.06281900 | 2.29178400  | -1.13482800 |
| C | -3.97965000 | 2.58864600  | -2.19643300 |
| C | -4.91678100 | 0.32923900  | -1.94992700 |
| C | -3.95874400 | -0.01376400 | -1.01795200 |
| C | -2.18740100 | 3.32500200  | -0.52455300 |
| C | -2.72278200 | 4.53603200  | 0.03814700  |
| C | -1.82186900 | 5.46350600  | 0.65585800  |
| C | -0.46411100 | 5.10064400  | 0.83968300  |
| C | 0.02815700  | 3.88558400  | 0.41575800  |
| H | -5.66555400 | -0.40407200 | -2.22830700 |
| H | 0.18419000  | 5.76240300  | 1.40524500  |
| C | -3.91405100 | -1.37652300 | -0.41122800 |
| C | -3.62491300 | -2.50272600 | -1.21184100 |
| C | -4.20720400 | -1.54040500 | 0.96313600  |
| C | -3.66582200 | -3.77466400 | -0.62645300 |
| C | -4.21040300 | -2.82638000 | 1.50028600  |
| C | -3.96260900 | -3.96148600 | 0.72229000  |
| H | -3.45313200 | -4.63628300 | -1.24764700 |
| H | -4.42939200 | -2.95699200 | 2.55681200  |
| C | 1.32095600  | 3.34549100  | 0.92968700  |
| C | 1.34104700  | 2.85808800  | 2.25821600  |
| C | 2.47288000  | 3.27837800  | 0.12854300  |
| C | 2.54875500  | 2.38558900  | 2.77160000  |
| C | 3.65248100  | 2.75084800  | 0.67249800  |
| C | 3.71559500  | 2.32872300  | 2.00462300  |
| H | 2.58694700  | 2.03712700  | 3.80007800  |

|   |             |             |             |
|---|-------------|-------------|-------------|
| H | 4.52918900  | 2.65987700  | 0.04448000  |
| C | -4.93135900 | 1.59445400  | -2.58634600 |
| C | -4.86266600 | 4.07215200  | -3.90917500 |
| C | -5.83200800 | 3.10440800  | -4.26518900 |
| C | -5.86089200 | 1.89124600  | -3.61854100 |
| C | -3.96069700 | 3.82245100  | -2.90004300 |
| H | -4.82696400 | 5.01791300  | -4.44093700 |
| H | -6.54157200 | 3.31804400  | -5.05850900 |
| H | -6.58538500 | 1.13129000  | -3.89729900 |
| H | -3.21794500 | 4.56591300  | -2.63713800 |
| C | -3.66922100 | 6.97376900  | 1.12421300  |
| C | -4.56851400 | 6.03210500  | 0.57273600  |
| C | -4.10994400 | 4.84466400  | 0.04791900  |
| C | -2.32553200 | 6.68681200  | 1.17212600  |
| H | -4.04451900 | 7.90942200  | 1.52691100  |
| H | -5.63334100 | 6.24376900  | 0.56880800  |
| H | -4.81464700 | 4.13274900  | -0.36041000 |
| H | -1.62559400 | 7.38282900  | 1.62581200  |
| C | -3.03528400 | 0.99573600  | -0.64189600 |
| C | -0.84035400 | 3.07066300  | -0.35312500 |
| O | -0.29454000 | 1.92131300  | -0.94920700 |
| O | -2.06166400 | 0.64340400  | 0.31470900  |
| P | -0.54462900 | 0.50201600  | -0.23367000 |
| O | 0.38956200  | 0.17765700  | 0.89099200  |
| O | -0.53348100 | -0.48237600 | -1.46365900 |
| C | 2.47497600  | 3.81228300  | -1.29629600 |
| C | 2.85686600  | 2.73296900  | -2.32080600 |
| C | 3.39985800  | 5.03654400  | -1.41148500 |
| H | 1.45899000  | 4.14734100  | -1.52929400 |
| H | 2.14610900  | 1.90256100  | -2.28414400 |
| H | 2.84312600  | 3.14979600  | -3.33422000 |
| H | 3.85736700  | 2.33686700  | -2.12404800 |
| H | 3.11099100  | 5.81656700  | -0.69977200 |
| H | 4.43903000  | 4.76099900  | -1.20446900 |
| H | 3.35747000  | 5.45963300  | -2.42096800 |
| C | 4.99092400  | 1.79233600  | 2.63712900  |
| C | 6.26436200  | 2.45498800  | 2.09537400  |
| C | 5.07226900  | 0.26225100  | 2.48786500  |
| H | 4.92281800  | 2.01524400  | 3.71077000  |
| H | 6.21246400  | 3.54486900  | 2.18308300  |
| H | 7.13811600  | 2.10923500  | 2.65812800  |
| H | 6.41798300  | 2.19823500  | 1.04453300  |
| H | 4.17480700  | -0.22266000 | 2.88625700  |
| H | 5.16985900  | 0.00317700  | 1.43193900  |

|    |             |             |             |
|----|-------------|-------------|-------------|
| H  | 5.94380900  | -0.13715100 | 3.01881500  |
| C  | 0.09474700  | 2.83103300  | 3.13873900  |
| C  | 0.09549300  | 4.00309500  | 4.13539700  |
| C  | -0.07596600 | 1.49358500  | 3.87973600  |
| H  | -0.77926200 | 2.94655100  | 2.49190800  |
| H  | 0.13583700  | 4.96691000  | 3.62098200  |
| H  | -0.80749000 | 3.98598800  | 4.75533400  |
| H  | 0.96454400  | 3.94258000  | 4.79971500  |
| H  | -0.01825600 | 0.65886100  | 3.17943600  |
| H  | 0.69103600  | 1.35304100  | 4.64875700  |
| H  | -1.04951600 | 1.46923300  | 4.38142000  |
| C  | -4.60853100 | -0.37000800 | 1.85441300  |
| C  | -3.67134400 | -0.19870400 | 3.05885100  |
| C  | -6.07361100 | -0.51526100 | 2.30324800  |
| H  | -4.54966100 | 0.54829700  | 1.26582800  |
| H  | -2.64460800 | -0.03291600 | 2.72868200  |
| H  | -3.98172300 | 0.66207400  | 3.66142900  |
| H  | -3.68215100 | -1.08195700 | 3.70485500  |
| H  | -6.74082000 | -0.60402400 | 1.44024100  |
| H  | -6.21162300 | -1.40642800 | 2.92440100  |
| H  | -6.38495500 | 0.35536600  | 2.89059000  |
| C  | -3.30846300 | -2.39315900 | -2.70054700 |
| C  | -4.51844800 | -2.83157100 | -3.54685500 |
| C  | -2.06927300 | -3.20300200 | -3.11219700 |
| H  | -3.09973700 | -1.34382100 | -2.92461600 |
| H  | -5.41474900 | -2.24993200 | -3.31459300 |
| H  | -4.30459300 | -2.71594800 | -4.61486600 |
| H  | -4.75380900 | -3.88533400 | -3.36216900 |
| H  | -1.19845700 | -2.95884000 | -2.50678500 |
| H  | -2.23378500 | -4.28095500 | -3.01871800 |
| H  | -1.82401500 | -3.00346400 | -4.16050000 |
| C  | -4.09133000 | -5.33683000 | 1.35960200  |
| C  | -3.43791700 | -6.46622200 | 0.55606900  |
| C  | -5.57639900 | -5.65485300 | 1.62124900  |
| H  | -3.58706600 | -5.28162900 | 2.33268000  |
| H  | -2.39736300 | -6.24088600 | 0.31112900  |
| H  | -3.46570000 | -7.39861900 | 1.12916100  |
| H  | -3.97496800 | -6.64781400 | -0.38177200 |
| H  | -6.04790700 | -4.88506900 | 2.23908100  |
| H  | -6.12715400 | -5.70675900 | 0.67557500  |
| H  | -5.68443000 | -6.61819900 | 2.13159900  |
| Ag | 2.47702300  | -0.12917000 | -0.03838100 |
| C  | 3.98910800  | -0.66550000 | -1.48488600 |
| C  | 5.37677700  | -0.21020100 | -1.19441500 |

|   |             |             |             |
|---|-------------|-------------|-------------|
| C | 7.70695700  | -1.14501000 | -1.22031100 |
| O | 5.74207500  | 0.93814400  | -0.92144500 |
| N | 6.24569400  | -1.28293500 | -1.29050800 |
| C | 5.66326400  | -2.36514400 | -2.06004800 |
| H | 6.01168800  | -3.34077700 | -1.70611500 |
| H | 5.93338700  | -2.28931600 | -3.12471300 |
| C | 4.12044500  | -2.18914200 | -1.87446300 |
| C | 3.40333600  | -2.40381500 | -3.16612400 |
| C | 3.62415400  | -3.08560500 | -0.76286700 |
| C | 2.32542600  | -3.18980400 | -3.31764800 |
| C | 2.54881800  | -3.88434300 | -0.93538300 |
| C | 1.80595700  | -3.95226100 | -2.18673300 |
| H | 1.79269900  | -3.27873900 | -4.25842700 |
| H | 2.18928600  | -4.50333300 | -0.12039300 |
| H | 8.09371700  | -2.16423300 | -1.34508400 |
| C | 8.24995900  | -0.27455300 | -2.36160900 |
| H | 9.34406200  | -0.25067400 | -2.33786300 |
| H | 7.94185900  | -0.66772800 | -3.33621500 |
| H | 7.87066900  | 0.74420800  | -2.26075900 |
| C | 8.14747300  | -0.64144600 | 0.15709800  |
| H | 7.79869600  | 0.37820900  | 0.32007100  |
| H | 7.73784000  | -1.27756000 | 0.94716600  |
| H | 9.23966500  | -0.65825000 | 0.22858000  |
| O | 0.76384400  | -4.63416500 | -2.30845500 |
| H | 0.03057100  | -4.86311000 | -0.97322700 |
| H | 3.60906500  | -0.08482000 | -2.32975900 |
| C | -1.03478100 | -2.38915900 | 3.97127700  |
| C | -0.79294700 | -2.44535900 | 2.60142800  |
| C | -0.73082700 | -3.68642100 | 1.95570800  |
| C | -0.90034000 | -4.86914000 | 2.68796000  |
| C | -1.15586700 | -4.80644100 | 4.05569700  |
| C | -1.22495900 | -3.56701400 | 4.69762200  |
| H | -1.07829800 | -1.42600800 | 4.46869300  |
| H | -0.63665700 | -1.54284000 | 2.02499300  |
| H | -0.83480900 | -5.82311700 | 2.17926700  |
| H | -1.29582800 | -5.72201600 | 4.62209100  |
| H | -1.41971300 | -3.52063000 | 5.76514000  |
| C | -0.45378700 | -3.71769700 | 0.49892900  |
| O | -0.32585600 | -4.92697500 | -0.01499000 |
| O | -0.30942200 | -2.68827700 | -0.16467500 |
| H | -0.42976300 | -1.41730300 | -1.12242500 |
| C | 4.34527800  | -3.05632100 | 0.55296500  |
| H | 5.38577900  | -3.38111600 | 0.44718000  |
| H | 4.37429300  | -2.03836200 | 0.94985100  |

|   |            |             |             |
|---|------------|-------------|-------------|
| H | 3.85124400 | -3.70234100 | 1.28187000  |
| H | 3.77771100 | -1.82465100 | -4.00769500 |

### TSJ

|                                              |  |          |                             |
|----------------------------------------------|--|----------|-----------------------------|
| Zero-point correction=                       |  |          | 1.336869 (Hartree/Particle) |
| Thermal correction to Energy=                |  |          | 1.403145                    |
| Thermal correction to Enthalpy=              |  |          | 1.404010                    |
| Thermal correction to Gibbs Free Energy=     |  | 1.242286 |                             |
| Sum of electronic and zero-point Energies=   |  |          | -3858.702534                |
| Sum of electronic and thermal Energies=      |  |          | -3858.636258                |
| Sum of electronic and thermal Enthalpies=    |  |          | -3858.635393                |
| Sum of electronic and thermal Free Energies= |  |          | -3858.797118                |

|   |             |             |             |
|---|-------------|-------------|-------------|
| C | -1.94761500 | 2.67281700  | -1.35724600 |
| C | -2.68127000 | 3.23052400  | -2.45846400 |
| C | -4.22703700 | 1.33514400  | -2.31770500 |
| C | -3.46799100 | 0.73265800  | -1.33555100 |
| C | -0.93295200 | 3.48279000  | -0.63657100 |
| C | -1.26425200 | 4.76715300  | -0.08031800 |
| C | -0.22994600 | 5.52812500  | 0.55430000  |
| C | 1.05601200  | 4.95573000  | 0.72211800  |
| C | 1.34116700  | 3.67314100  | 0.30666300  |
| H | -5.16252700 | 0.86995300  | -2.61217400 |
| H | 1.81489100  | 5.52128900  | 1.25411000  |
| C | -3.98023700 | -0.48947600 | -0.64838000 |
| C | -4.12681000 | -1.70450900 | -1.35285900 |
| C | -4.41110100 | -0.38104600 | 0.69524600  |
| C | -4.69841600 | -2.79595900 | -0.68854400 |
| C | -4.97109200 | -1.50229400 | 1.30715300  |
| C | -5.13134500 | -2.71447000 | 0.63358100  |
| H | -4.79510600 | -3.73577900 | -1.21263800 |
| H | -5.29542100 | -1.43926800 | 2.33999600  |
| C | 2.59290600  | 2.97271300  | 0.71000400  |
| C | 2.77326500  | 2.63058000  | 2.07344600  |
| C | 3.54416200  | 2.57400500  | -0.25057500 |
| C | 3.90725600  | 1.90193300  | 2.43916100  |
| C | 4.65672300  | 1.81715900  | 0.15993600  |
| C | 4.85495500  | 1.46241500  | 1.50416100  |
| H | 4.04924400  | 1.63998500  | 3.48348200  |
| H | 5.37505600  | 1.50257600  | -0.58563200 |
| C | -3.83309600 | 2.54019300  | -2.94707400 |
| C | -3.01654200 | 4.93790500  | -4.15901900 |
| C | -4.17476100 | 4.26928900  | -4.62090400 |

|   |             |             |             |
|---|-------------|-------------|-------------|
| C | -4.57102400 | 3.09419100  | -4.02616400 |
| C | -2.29090100 | 4.43481700  | -3.10280600 |
| H | -2.69440300 | 5.85358900  | -4.64535400 |
| H | -4.74156200 | 4.68109200  | -5.45024900 |
| H | -5.45074500 | 2.56297900  | -4.37862800 |
| H | -1.40123500 | 4.94993400  | -2.76104300 |
| C | -1.80531300 | 7.32420100  | 1.00554600  |
| C | -2.84012500 | 6.55110700  | 0.42968200  |
| C | -2.57854600 | 5.30688200  | -0.09867800 |
| C | -0.52932500 | 6.81619500  | 1.07189900  |
| H | -2.02531600 | 8.30715600  | 1.41043900  |
| H | -3.85370000 | 6.93955800  | 0.40941600  |
| H | -3.38378800 | 4.72422100  | -0.52646100 |
| H | 0.27002600  | 7.38428700  | 1.53967700  |
| C | -2.26835000 | 1.38860500  | -0.93773800 |
| C | 0.33178500  | 2.97882000  | -0.41474700 |
| O | 0.64096300  | 1.73809800  | -0.95855800 |
| O | -1.47382200 | 0.73349300  | 0.01322300  |
| P | 0.08924500  | 0.38294600  | -0.22104500 |
| O | 0.78037900  | 0.15639700  | 1.09513200  |
| O | 0.30947600  | -0.68865800 | -1.31929900 |
| C | 3.42805700  | 2.96511700  | -1.71747100 |
| C | 3.41931000  | 1.74420500  | -2.65262900 |
| C | 4.55156200  | 3.94812800  | -2.09417700 |
| H | 2.47894600  | 3.49072700  | -1.85054600 |
| H | 2.56294800  | 1.10229900  | -2.43658000 |
| H | 3.34480500  | 2.07102800  | -3.69539400 |
| H | 4.32733400  | 1.14339400  | -2.54760600 |
| H | 4.53933400  | 4.82930400  | -1.44503900 |
| H | 5.53594800  | 3.47662000  | -2.00262500 |
| H | 4.43568900  | 4.28340200  | -3.13002000 |
| C | 6.02649100  | 0.60760200  | 1.97258900  |
| C | 7.13362800  | 0.44314800  | 0.92594300  |
| C | 5.52690100  | -0.77339300 | 2.44415400  |
| H | 6.45490300  | 1.11534900  | 2.84808000  |
| H | 7.51756400  | 1.41185800  | 0.59087900  |
| H | 7.96967100  | -0.11996000 | 1.35223800  |
| H | 6.76659400  | -0.10572300 | 0.05380900  |
| H | 4.75744800  | -0.68365000 | 3.21618000  |
| H | 5.10420300  | -1.32760100 | 1.59705800  |
| H | 6.35083000  | -1.36966200 | 2.85050500  |
| C | 1.76104600  | 2.98689500  | 3.15551500  |
| C | 2.30045000  | 4.10688100  | 4.06166000  |
| C | 1.33888400  | 1.75960100  | 3.98000800  |

|    |             |             |             |
|----|-------------|-------------|-------------|
| H  | 0.86075100  | 3.36159500  | 2.66550100  |
| H  | 2.54925900  | 5.00369900  | 3.48590500  |
| H  | 1.55773000  | 4.38217200  | 4.81775500  |
| H  | 3.20886500  | 3.78539100  | 4.58315700  |
| H  | 0.97448700  | 0.96914000  | 3.32148700  |
| H  | 2.16552100  | 1.36238100  | 4.57902100  |
| H  | 0.53988400  | 2.04036100  | 4.67481800  |
| C  | -4.36096400 | 0.94829800  | 1.44726500  |
| C  | -4.38120500 | 0.80240900  | 2.97433000  |
| C  | -5.51436400 | 1.86694500  | 0.99806200  |
| H  | -3.42140800 | 1.44694600  | 1.19747200  |
| H  | -3.61831300 | 0.10582500  | 3.32433600  |
| H  | -4.19280100 | 1.77631600  | 3.43795600  |
| H  | -5.35561300 | 0.45675000  | 3.33640900  |
| H  | -5.48862300 | 2.05625100  | -0.07737600 |
| H  | -6.47938700 | 1.40651500  | 1.23702800  |
| H  | -5.46030000 | 2.83134800  | 1.51566100  |
| C  | -3.67221000 | -1.84346900 | -2.80858400 |
| C  | -4.03207100 | -3.19483500 | -3.44101200 |
| C  | -2.16118400 | -1.59713500 | -2.94552600 |
| H  | -4.18859700 | -1.07013300 | -3.39187400 |
| H  | -5.10517000 | -3.40455400 | -3.38696700 |
| H  | -3.74820700 | -3.18666600 | -4.49850400 |
| H  | -3.49136300 | -4.01202500 | -2.95326200 |
| H  | -1.89731700 | -0.55274500 | -2.78690800 |
| H  | -1.61211900 | -2.17825300 | -2.20796500 |
| H  | -1.81635200 | -1.87401500 | -3.94798000 |
| C  | -5.81912300 | -3.86650600 | 1.35015900  |
| C  | -5.52270900 | -5.24954600 | 0.76169400  |
| C  | -7.33904700 | -3.61625900 | 1.39760100  |
| H  | -5.45135400 | -3.85804200 | 2.38505800  |
| H  | -4.44880300 | -5.43955100 | 0.71487600  |
| H  | -5.98329600 | -6.02669700 | 1.38046800  |
| H  | -5.93605300 | -5.35252000 | -0.24756900 |
| H  | -7.56949400 | -2.65304200 | 1.86235000  |
| H  | -7.75330400 | -3.60416500 | 0.38327300  |
| H  | -7.84901200 | -4.40323900 | 1.96445100  |
| Ag | 2.98812800  | -0.32719100 | 0.31300300  |
| C  | 2.62583700  | -2.06534600 | -1.70289800 |
| C  | 4.09739500  | -2.14946800 | -1.45781100 |
| C  | 5.95293200  | -3.84341100 | -1.53155500 |
| O  | 4.84949900  | -1.19890900 | -1.13649000 |
| N  | 4.54421200  | -3.42733500 | -1.60567800 |
| C  | 3.51166700  | -4.32066600 | -2.10248500 |



|   |             |             |             |
|---|-------------|-------------|-------------|
| H | 3.56410900  | -5.29605800 | -1.60723300 |
| H | 3.62126500  | -4.48832800 | -3.18329100 |
| C | 2.17280900  | -3.57103100 | -1.78455100 |
| C | 1.20445000  | -3.78593000 | -2.90279100 |
| C | 1.63928400  | -4.02901600 | -0.44079800 |
| C | -0.04668300 | -4.24267000 | -2.74893200 |
| C | 0.38260700  | -4.49202300 | -0.30690700 |
| C | -0.56491300 | -4.55433500 | -1.41522400 |
| H | -0.73331600 | -4.34636000 | -3.58150300 |
| H | 0.00688700  | -4.79372200 | 0.66430700  |
| H | 5.93807900  | -4.92414000 | -1.71327000 |
| C | 6.78418900  | -3.17618800 | -2.63345600 |
| H | 7.81317000  | -3.54835700 | -2.61293800 |
| H | 6.36278900  | -3.38858400 | -3.62093100 |
| H | 6.79659400  | -2.09434200 | -2.48557000 |
| C | 6.53689600  | -3.60324100 | -0.13548900 |
| H | 6.57753700  | -2.53572300 | 0.08062600  |
| H | 5.92816100  | -4.09096700 | 0.63168600  |
| H | 7.55056500  | -4.01214400 | -0.08025500 |
| O | -1.76334600 | -4.84467200 | -1.24079100 |
| H | -2.23606600 | -4.40142300 | 0.31599900  |
| H | 2.50013000  | -1.57076800 | -2.67605300 |
| C | -1.41173000 | -0.83664200 | 4.57125900  |
| C | -1.31655500 | -1.29676700 | 3.25906200  |
| C | -2.02576800 | -2.44007900 | 2.87145200  |
| C | -2.82934300 | -3.11591500 | 3.79776900  |
| C | -2.93761100 | -2.63878800 | 5.10242000  |
| C | -2.22626200 | -1.50096000 | 5.49143600  |
| H | -0.85885200 | 0.04724400  | 4.87184600  |
| H | -0.70047000 | -0.78805800 | 2.52653400  |
| H | -3.36271600 | -4.00544800 | 3.48447500  |
| H | -3.57149600 | -3.15537700 | 5.81702900  |
| H | -2.30741500 | -1.13297000 | 6.51026700  |
| C | -1.89279400 | -2.90984500 | 1.46487900  |
| O | -2.36352800 | -4.15036400 | 1.27500400  |
| O | -1.36786600 | -2.24982500 | 0.58298400  |
| H | 1.26841600  | -1.20734200 | -1.26855600 |
| C | 2.52614300  | -3.91332400 | 0.76514200  |
| H | 2.02358100  | -4.29738500 | 1.65485300  |
| H | 3.47484700  | -4.44349700 | 0.63731200  |
| H | 2.77361100  | -2.85963700 | 0.94946100  |
| H | 1.56802400  | -3.51661200 | -3.89257700 |

(S)-2a

|                                              |                             |
|----------------------------------------------|-----------------------------|
| Zero-point correction=                       | 0.280073 (Hartree/Particle) |
| Thermal correction to Energy=                | 0.292790                    |
| Thermal correction to Enthalpy=              | 0.293655                    |
| Thermal correction to Gibbs Free Energy=     | 0.243529                    |
| Sum of electronic and zero-point Energies=   | -710.536580                 |
| Sum of electronic and thermal Energies=      | -710.523863                 |
| Sum of electronic and thermal Enthalpies=    | -710.522998                 |
| Sum of electronic and thermal Free Energies= | -710.573124                 |

|   |             |             |             |
|---|-------------|-------------|-------------|
| C | -0.06561700 | -0.61353600 | 1.44513900  |
| C | -1.50237900 | -0.23330700 | 1.09890200  |
| C | -2.87906300 | -0.02474300 | -0.98249600 |
| O | -2.40097500 | -0.02050000 | 1.90069600  |
| N | -1.60686800 | -0.20108900 | -0.26388400 |
| C | -0.38515000 | -0.57396800 | -0.95330700 |
| H | -0.19756500 | 0.07960800  | -1.81134400 |
| H | -0.43584300 | -1.60578600 | -1.32848800 |
| C | 0.74381100  | -0.43428800 | 0.12557300  |
| C | 1.74933300  | -1.53727100 | -0.03610000 |
| C | 1.35935200  | 0.95482400  | 0.06748900  |
| C | 3.06298100  | -1.34771500 | -0.20102100 |
| C | 2.68416500  | 1.12237300  | -0.09901200 |
| C | 3.63933800  | 0.01127600  | -0.24786200 |
| H | 3.75810200  | -2.17463100 | -0.30555800 |
| H | 3.11882400  | 2.11734300  | -0.13300900 |
| H | -2.61525200 | -0.05902400 | -2.04570500 |
| C | -3.84268800 | -1.17767600 | -0.68009200 |
| H | -4.75826800 | -1.07083700 | -1.26945900 |
| H | -3.38691300 | -2.14140400 | -0.92782500 |
| H | -4.10492000 | -1.17668100 | 0.37979000  |
| C | -3.49432000 | 1.34528100  | -0.67983100 |
| H | -3.73388100 | 1.42282200  | 0.38170400  |
| H | -2.80067700 | 2.14978700  | -0.94176100 |
| H | -4.41085800 | 1.48033800  | -1.26196300 |
| O | 4.84254700  | 0.20178100  | -0.40324300 |
| H | 0.31634200  | -0.01628300 | 2.27416700  |
| H | -0.06260800 | -1.66032500 | 1.76825700  |
| H | 1.34087700  | -2.54610800 | -0.00346200 |
| C | 0.44501800  | 2.14207800  | 0.20471000  |
| H | -0.30180300 | 2.16746500  | -0.59580600 |
| H | -0.11540400 | 2.11962700  | 1.14564400  |
| H | 1.01666200  | 3.07149400  | 0.16983700  |
